# Supplementary material for: Trust and truth in the post-truth era: cognitive and attitudinal predictors of confidence in AI-generated content
Source: Research Square preprint supplement (doi:10.21203/rs.3.rs-7973176/v1), 2025-11-24
Supplement: Supplementary file 1 [file beb3f31f9e99bdba633f77b4.xlsx]

## Sheet: Form Yanıtları 1
Zaman damgası	Cinsiyetiniz	Yaşınız	Eğitim düzeyiniz	Eğitim aldığınız bölüm ve sınıfınız	Yaşadığınız Şehir	Üretken yapay zekâ araçlarını kullanıyor musunuz?	Metin tabanlı yapay zekâ aracı kullanıyor musunuz?	Hangi metin tabanlı yapay zekâ aracını sıklıkla tercih ediyorsunuz?	Görüntü tabanlı yapay zekâ aracı kullanıyor musunuz?	Hangi görüntü tabanlı yapay zekâ aracını tercih ediyorsunuz?	Ses tabanlı yapay zekâ aracı kullanıyor musunuz?	Hangi ses tabanlı yapay zekâ aracını tercih ediyorsunuz?	Üretken yapay zekâ araçlarını (örneğin ChatGPT, Midjourney gibi) kullanma sıklığınız nedir?	Üretken yapay zekâ araçlarına yönelik kullanım sıklığınızı belirtiniz. [ChatGPT]	Üretken yapay zekâ araçlarına yönelik kullanım sıklığınızı belirtiniz. [Gemini]	Üretken yapay zekâ araçlarına yönelik kullanım sıklığınızı belirtiniz. [DeepSeek]	Üretken yapay zekâ araçlarına yönelik kullanım sıklığınızı belirtiniz. [Grok]	Üretken yapay zekâ araçlarına yönelik kullanım sıklığınızı belirtiniz. [Copilot]	Üretken yapay zekâ araçlarına yönelik kullanım sıklığınızı belirtiniz. [Perplexity]	Üretken yapay zekâ araçlarına yönelik kullanım sıklığınızı belirtiniz. [Midjourney]	Üretken yapay zekâ araçlarına yönelik kullanım sıklığınızı belirtiniz. [Dall-E]	Üretken yapay zekâ araçlarına yönelik kullanım sıklığınızı belirtiniz. [Flux]	Üretken yapay zekâ araçlarına yönelik kullanım sıklığınızı belirtiniz. [Kling]	Üretken yapay zekâ araçlarına yönelik kullanım sıklığınızı belirtiniz. [Sora]	Üretken yapay zekâ araçlarına yönelik kullanım sıklığınızı belirtiniz. [Runway ML]	Bir üretken yapay zekâ aracını en son ne zaman kullandınız?	Üretken yapay zekâ araçlarına ücret ödüyor musunuz?	Üretken yapay zekâ araçlarına ne kadar ücret ödüyorsunuz?	Hangi alanlarda üretken yapay zekâ araçlarını kullanıyorsunuz?	Üretken yapay zekâ araçlarını kullanırken kendinizi ne derece yetkin hissediyorsunuz?	Üretken yapay zekâ araçları sizin için ne derece vazgeçilmez hâle geldi?	Aşağıda yer alan ifadeler üretken yapay zekâ okuryazarlığını ölçmektedir. Söz konusu ifadeleri en sık kullandığınız üretken yapay zekâ aracını göz önünde bulundurarak yanıtlayınız. [Akıllı (yapay zekâyı kullanan) ve akıllı olmayan araçlar arasındaki farkları ayırt edebilirim.]	Aşağıda yer alan ifadeler üretken yapay zekâ okuryazarlığını ölçmektedir. Söz konusu ifadeleri en sık kullandığınız üretken yapay zekâ aracını göz önünde bulundurarak yanıtlayınız. [Üretken yapay zekâ uygulama ve ürünlerinde kullanılan teknolojiyi tespit edebilirim.]	Aşağıda yer alan ifadeler üretken yapay zekâ okuryazarlığını ölçmektedir. Söz konusu ifadeleri en sık kullandığınız üretken yapay zekâ aracını göz önünde bulundurarak yanıtlayınız. [Günlük işlerime yardımcı olması için üretken yapay zekâ uygulamalarını veya ürünlerini ustalıkla kullanabilirim.]	Aşağıda yer alan ifadeler üretken yapay zekâ okuryazarlığını ölçmektedir. Söz konusu ifadeleri en sık kullandığınız üretken yapay zekâ aracını göz önünde bulundurarak yanıtlayınız. [İş verimliliğini artırmak için üretken yapay zekâ uygulamalarını veya ürünlerini kullanabilirim.]	Aşağıda yer alan ifadeler üretken yapay zekâ okuryazarlığını ölçmektedir. Söz konusu ifadeleri en sık kullandığınız üretken yapay zekâ aracını göz önünde bulundurarak yanıtlayınız. [Bir süre kullandıktan sonra bir üretken yapay zekâ uygulamasının veya ürününün yeteneklerini ve sınırlamalarını değerlendirebilirim.]	Aşağıda yer alan ifadeler üretken yapay zekâ okuryazarlığını ölçmektedir. Söz konusu ifadeleri en sık kullandığınız üretken yapay zekâ aracını göz önünde bulundurarak yanıtlayınız. [Üretken yapay zekâ tarafından sağlanan çeşitli çözümler arasından uygun bir çözüm seçebilirim.]	Aşağıda yer alan ifadeler üretken yapay zekâ okuryazarlığını ölçmektedir. Söz konusu ifadeleri en sık kullandığınız üretken yapay zekâ aracını göz önünde bulundurarak yanıtlayınız. [Farklı görevler için çeşitli üretken yapay zekâ uygulamaları arasından en uygun ürünü seçebilirim.]	Aşağıda yer alan ifadeler üretken yapay zekâ okuryazarlığını ölçmektedir. Söz konusu ifadeleri en sık kullandığınız üretken yapay zekâ aracını göz önünde bulundurarak yanıtlayınız. [Üretken yapay zekâ uygulamalarını kullanırken her zaman etik ilkelere uyarım.]	Aşağıda yer alan ifadeler üretken yapay zekâ okuryazarlığını ölçmektedir. Söz konusu ifadeleri en sık kullandığınız üretken yapay zekâ aracını göz önünde bulundurarak yanıtlayınız. [Üretken yapay zekâ uygulamalarını veya ürünlerini kullanırken gizlilik ve bilgi güvenliği konularına hiç dikkat etmem.]	Aşağıda yer alan ifadeler üretken yapay zekâ okuryazarlığını ölçmektedir. Söz konusu ifadeleri en sık kullandığınız üretken yapay zekâ aracını göz önünde bulundurarak yanıtlayınız. [Üretken yapay zekâ teknolojisinin kötüye kullanımına karşı her zaman dikkatliyim.]	Aşağıda yer alan ifadeler üretken yapay zekâ kabulünü ölçmektedir. Söz konusu ifadeleri en sık kullandığınız üretken yapay zekâ aracını göz önünde bulundurarak yanıtlayınız. [Günlük hayatımda yapay zekâ sistemlerini kullanmak ilgimi çekiyor.]	Aşağıda yer alan ifadeler üretken yapay zekâ kabulünü ölçmektedir. Söz konusu ifadeleri en sık kullandığınız üretken yapay zekâ aracını göz önünde bulundurarak yanıtlayınız. [Yapay zekânın birçok faydalı uygulaması vardır.]	Aşağıda yer alan ifadeler üretken yapay zekâ kabulünü ölçmektedir. Söz konusu ifadeleri en sık kullandığınız üretken yapay zekâ aracını göz önünde bulundurarak yanıtlayınız. [Yapay zekâ heyecan vericidir.]	Aşağıda yer alan ifadeler üretken yapay zekâ kabulünü ölçmektedir. Söz konusu ifadeleri en sık kullandığınız üretken yapay zekâ aracını göz önünde bulundurarak yanıtlayınız. [Yapay zekâ bu ülke için yeni ekonomik fırsatlar sağlayabilir.]	Aşağıda yer alan ifadeler üretken yapay zekâ kabulünü ölçmektedir. Söz konusu ifadeleri en sık kullandığınız üretken yapay zekâ aracını göz önünde bulundurarak yanıtlayınız. [Yapay zekâyı kendi işimde kullanmak isterim.]	Aşağıda yer alan ifadeler üretken yapay zekâ kabulünü ölçmektedir. Söz konusu ifadeleri en sık kullandığınız üretken yapay zekâ aracını göz önünde bulundurarak yanıtlayınız. [Yapay zekâya sahip bir yazılım/robot, birçok rutin işi bir insandan daha iyi yapabilir.]	Aşağıda yer alan ifadeler üretken yapay zekâ kabulünü ölçmektedir. Söz konusu ifadeleri en sık kullandığınız üretken yapay zekâ aracını göz önünde bulundurarak yanıtlayınız. [Yapay zekânın yapabileceklerinden etkilendim.]	Aşağıda yer alan ifadeler üretken yapay zekâ kabulünü ölçmektedir. Söz konusu ifadeleri en sık kullandığınız üretken yapay zekâ aracını göz önünde bulundurarak yanıtlayınız. [Yapay zekânın insanların iyi oluşları üzerinde olumlu etkileri olabilir.]
2025-05-03 22:03:51	Erkek		Lisans		Konya	Evet, kullanıyorum.	Evet, kullanıyorum.	ChatGPT, DeepSeek, Grok	Evet, kullanıyorum.	Midjourney, Flux, Runway ML, Kling	Evet, kullanıyorum.	Elevenlabs	4	Çok sık kullanırım	Nadiren kullanırım	Ara sıra kullanırım	Ara sıra kullanırım	Nadiren kullanırım	Ara sıra kullanırım	Sık kullanırım	Ara sıra kullanırım	Çok sık kullanırım	Çok sık kullanırım	Nadiren kullanırım		Bugün	5	20 USD	İçerik Üretimi (metin, görsel, ses), İş / Mesleki Amaçlar, Günlük İşler (takvim, e-posta, öneriler vs.), Eğlence	Çok yetkinim	Önemli	Katılıyorum	Katılıyorum	Kesinlikle Katılıyorum	Kesinlikle Katılıyorum	Katılıyorum	Kesinlikle Katılıyorum	Katılıyorum	Kararsızım	Kararsızım	Katılıyorum	Kesinlikle katılıyorum	Kesinlikle katılıyorum	Kesinlikle katılıyorum	Kesinlikle katılıyorum	Kesinlikle katılıyorum	Katılıyorum	Katılıyorum	Katılıyorum
2025-05-03 22:26:14	Kadın		Yüksek Lisans	Tıbbi Genetik ABD - Mezun	Konya	Evet, kullanıyorum.	Evet, kullanıyorum.	ChatGPT, Gemini	Hayır, kullanmıyorum.		Hayır, kullanmıyorum.		3	Ara sıra kullanırım	Nadiren kullanırım											Son 1 hafta içinde	4	24 USD	Eğitim / Öğrenme, İçerik Üretimi (metin, görsel, ses), İş / Mesleki Amaçlar	Yetkinim	Orta düzeyde önemli	Katılıyorum	Kararsızım	Katılıyorum	Kesinlikle Katılıyorum	Kesinlikle Katılıyorum	Katılıyorum	Katılıyorum	Kesinlikle Katılıyorum	Hiç katılmıyorum	Kesinlikle Katılıyorum	Katılıyorum	Katılıyorum	Katılıyorum	Kesinlikle katılıyorum	Kesinlikle katılıyorum	Kararsızım	Katılıyorum	Katılıyorum
2025-05-03 22:34:32	Erkek		Yüksek Lisans	genetik	konya	Evet, kullanıyorum.	Evet, kullanıyorum.	ChatGPT	Hayır, kullanmıyorum.		Hayır, kullanmıyorum.		3	Sık kullanırım	Hiç kullanmam	Hiç kullanmam	Hiç kullanmam	Hiç kullanmam	Hiç kullanmam	Hiç kullanmam	Hiç kullanmam	Hiç kullanmam	Hiç kullanmam	Hiç kullanmam		Son 1 hafta içinde	3	10 usd	Eğitim / Öğrenme, İçerik Üretimi (metin, görsel, ses), İş / Mesleki Amaçlar, Günlük İşler (takvim, e-posta, öneriler vs.)	Yetkinim	Orta düzeyde önemli	Kesinlikle Katılıyorum	Katılıyorum	Katılıyorum	Katılıyorum	Katılıyorum	Katılıyorum	Katılıyorum	Kararsızım	Kararsızım	Katılıyorum	Katılıyorum	Katılıyorum	Katılıyorum	Katılıyorum	Katılıyorum	Katılıyorum	Katılıyorum	Katılıyorum
2025-05-03 22:42:04	Kadın		Lisans	Biyoteknoloji- 2. Sınıf	Konya	Evet, kullanıyorum.	Evet, kullanıyorum.	ChatGPT	Hayır, kullanmıyorum.		Hayır, kullanmıyorum.		5	Çok sık kullanırım	Ara sıra kullanırım	Ara sıra kullanırım	Hiç kullanmam	Hiç kullanmam	Hiç kullanmam	Hiç kullanmam	Hiç kullanmam	Hiç kullanmam	Hiç kullanmam	Hiç kullanmam		Bugün	1	0	Eğitim / Öğrenme, İçerik Üretimi (metin, görsel, ses)	Orta düzeyde yetkinim	Önemli	Katılıyorum	Katılıyorum	Katılıyorum	Kesinlikle Katılıyorum	Katılıyorum	Kesinlikle Katılıyorum	Kesinlikle Katılıyorum	Katılıyorum	Katılmıyorum	Kesinlikle Katılıyorum	Kesinlikle katılıyorum	Kesinlikle katılıyorum	Kesinlikle katılıyorum	Katılıyorum	Kesinlikle katılıyorum	Kesinlikle katılıyorum	Kesinlikle katılıyorum	Kesinlikle katılıyorum
2025-05-04 20:25:04	Kadın		Lisans	İlk ve acil yardım 1. Sınıf	Adana	Evet, kullanıyorum.	Evet, kullanıyorum.	ChatGPT	Hayır, kullanmıyorum.		Hayır, kullanmıyorum.		2	Nadiren kullanırım	Nadiren kullanırım	Hiç kullanmam	Hiç kullanmam	Hiç kullanmam	Hiç kullanmam	Hiç kullanmam	Hiç kullanmam	Hiç kullanmam	Hiç kullanmam	Hiç kullanmam		Son 1 ay içinde	1	0	Eğitim / Öğrenme	Orta düzeyde yetkinim	Pek önemli değil	Katılıyorum	Kararsızım	Kararsızım	Katılıyorum	Kararsızım	Katılıyorum	Katılıyorum	Katılıyorum	Hiç katılmıyorum	Katılıyorum	Katılmıyorum	Kararsızım	Katılıyorum	Katılıyorum	Katılıyorum	Katılmıyorum	Kararsızım	Katılıyorum
2025-05-04 20:34:16	Kadın		Lisans	Okul Öncesi Öğretmenliği- 4.Sınıf	Adana	Evet, kullanıyorum.	Evet, kullanıyorum.	ChatGPT	Hayır, kullanmıyorum.		Hayır, kullanmıyorum.		3	Ara sıra kullanırım	Hiç kullanmam	Hiç kullanmam	Hiç kullanmam	Hiç kullanmam	Hiç kullanmam	Hiç kullanmam	Hiç kullanmam	Hiç kullanmam	Hiç kullanmam	Hiç kullanmam		Son 1 ay içinde	1	0 TL	Eğitim / Öğrenme, İş / Mesleki Amaçlar, Eğlence	Orta düzeyde yetkinim	Pek önemli değil	Katılıyorum	Katılıyorum	Katılıyorum	Katılıyorum	Katılıyorum	Katılıyorum	Katılıyorum	Katılıyorum	Hiç katılmıyorum	Kesinlikle Katılıyorum	Katılıyorum	Katılıyorum	Katılıyorum	Katılıyorum	Katılıyorum	Kararsızım	Katılıyorum	Kararsızım
2025-05-04 20:59:02	Kadın		Lisans	Çocuk Gelişimi 3.sınıf	Adana	Evet, kullanıyorum.	Evet, kullanıyorum.	ChatGPT	Hayır, kullanmıyorum.		Hayır, kullanmıyorum.		5	Çok sık kullanırım												Bugün	1		Günlük İşler (takvim, e-posta, öneriler vs.), Eğlence,	Çok yetkinim	Pek önemli değil	Kesinlikle Katılıyorum	Hiç katılmıyorum	Kesinlikle Katılıyorum	Kararsızım	Katılıyorum	Kesinlikle Katılıyorum	Katılmıyorum	Kesinlikle Katılıyorum	Hiç katılmıyorum	Kesinlikle Katılıyorum	Katılıyorum	Katılıyorum	Katılıyorum	Kararsızım	Katılmıyorum	Kesinlikle katılıyorum	Katılıyorum	Katılıyorum
2025-05-04 23:07:05	Erkek		Yüksek Lisans	Grafik-2	Konya	Evet, kullanıyorum.	Evet, kullanıyorum.	ChatGPT, Gemini, DeepSeek, Grok, Copilot	Evet, kullanıyorum.	Midjourney, Dall-E, Flux, Leonardo.ai, Kling	Evet, kullanıyorum.	Elevenlabs, Suno	5	Çok sık kullanırım	Ara sıra kullanırım	Ara sıra kullanırım	Sık kullanırım			Ara sıra kullanırım	Ara sıra kullanırım	Ara sıra kullanırım	Ara sıra kullanırım	Ara sıra kullanırım		Bugün	1		Eğitim / Öğrenme, İçerik Üretimi (metin, görsel, ses), İş / Mesleki Amaçlar,	Çok yetkinim	Önemli	Kesinlikle Katılıyorum	Kesinlikle Katılıyorum	Kesinlikle Katılıyorum	Kesinlikle Katılıyorum	Katılıyorum	Kesinlikle Katılıyorum	Kesinlikle Katılıyorum	Kesinlikle Katılıyorum	Hiç katılmıyorum	Kesinlikle Katılıyorum	Kesinlikle katılıyorum	Kesinlikle katılıyorum	Kesinlikle katılıyorum	Kesinlikle katılıyorum	Kesinlikle katılıyorum	Kesinlikle katılıyorum	Kesinlikle katılıyorum	Kesinlikle katılıyorum
2025-05-04 23:17:31	Kadın		Yüksek Lisans	Biyoteknoloji - Mezun	Konya	Evet, kullanıyorum.	Evet, kullanıyorum.	ChatGPT, Gemini	Hayır, kullanmıyorum.		Hayır, kullanmıyorum.		3	Sık kullanırım	Sık kullanırım	Hiç kullanmam	Hiç kullanmam	Hiç kullanmam	Hiç kullanmam	Hiç kullanmam	Hiç kullanmam	Hiç kullanmam	Hiç kullanmam	Hiç kullanmam		Son 1 hafta içinde	1		Eğitim / Öğrenme, İş / Mesleki Amaçlar, Günlük İşler (takvim, e-posta, öneriler vs.)	Yetkinim	Orta düzeyde önemli	Katılıyorum	Katılmıyorum	Katılıyorum	Kesinlikle Katılıyorum	Kesinlikle Katılıyorum	Kararsızım	Katılıyorum	Kesinlikle Katılıyorum	Hiç katılmıyorum	Katılıyorum	Katılıyorum	Katılıyorum	Kesinlikle katılıyorum	Kesinlikle katılıyorum	Kesinlikle katılıyorum	Katılmıyorum	Kararsızım	Katılıyorum
2025-05-04 23:18:39	Kadın		Lisans	Gastronomi-mezun	Konya	Evet, kullanıyorum.	Evet, kullanıyorum.	ChatGPT	Evet, kullanıyorum.	Midjourney, Dall-E, Flux, Runway ML, Kling	Evet, kullanıyorum.	Elevenlabs	4	Çok sık kullanırım			Sık kullanırım				Ara sıra kullanırım		Ara sıra kullanırım			Bugün	4	500	İçerik Üretimi (metin, görsel, ses), İş / Mesleki Amaçlar, Günlük İşler (takvim, e-posta, öneriler vs.)	Biraz yetkinim	Önemli	Kesinlikle Katılıyorum	Katılıyorum	Katılıyorum	Kesinlikle Katılıyorum	Kararsızım	Kesinlikle Katılıyorum	Katılıyorum	Hiç katılmıyorum	Katılmıyorum	Katılmıyorum	Kesinlikle katılıyorum	Kesinlikle katılıyorum	Kesinlikle katılıyorum	Kesinlikle katılıyorum	Kesinlikle katılıyorum	Kararsızım	Kesinlikle katılıyorum	Katılıyorum
2025-05-04 23:27:12	Erkek		Lisans	Uzay Bilimleri ve Teknolojileri	Antalya	Evet, kullanıyorum.	Evet, kullanıyorum.	ChatGPT	Evet, kullanıyorum.	Midjourney, Leonardo.ai	Hayır, kullanmıyorum.		5	Çok sık kullanırım	Ara sıra kullanırım	Ara sıra kullanırım	Hiç kullanmam	Hiç kullanmam	Hiç kullanmam	Ara sıra kullanırım	Hiç kullanmam	Hiç kullanmam	Hiç kullanmam	Hiç kullanmam		Son 1 hafta içinde	1		Eğitim / Öğrenme, İçerik Üretimi (metin, görsel, ses)	Orta düzeyde yetkinim	Pek önemli değil	Katılıyorum	Hiç katılmıyorum	Katılıyorum	Kesinlikle Katılıyorum	Kesinlikle Katılıyorum	Kesinlikle Katılıyorum	Kesinlikle Katılıyorum	Kesinlikle Katılıyorum	Hiç katılmıyorum	Kesinlikle Katılıyorum	Katılıyorum	Katılıyorum	Katılıyorum	Katılıyorum	Katılıyorum	Katılıyorum	Katılıyorum	Katılıyorum
2025-05-04 23:28:29	Kadın		Yüksek Lisans		Konya	Evet, kullanıyorum.	Evet, kullanıyorum.	ChatGPT, Gemini	Hayır, kullanmıyorum.		Hayır, kullanmıyorum.		4	Sık kullanırım	Ara sıra kullanırım	Hiç kullanmam	Hiç kullanmam	Hiç kullanmam	Hiç kullanmam	Hiç kullanmam	Hiç kullanmam	Hiç kullanmam	Hiç kullanmam	Hiç kullanmam		Bugün	3		Eğitim / Öğrenme, İş / Mesleki Amaçlar	Orta düzeyde yetkinim	Orta düzeyde önemli	Katılmıyorum	Katılmıyorum	Katılıyorum	Katılıyorum	Katılıyorum	Katılıyorum	Kesinlikle Katılıyorum	Kesinlikle Katılıyorum	Hiç katılmıyorum	Kesinlikle Katılıyorum	Katılıyorum	Katılıyorum	Katılıyorum	Katılıyorum	Katılıyorum	Hiç katılmıyorum	Katılıyorum	Kesinlikle katılıyorum
2025-05-04 23:49:15	Erkek		Lisans	Uluslararası İlişkiler 2	Konya	Hayır, kullanmıyorum.
2025-05-04 23:50:10	Kadın		Lisans	Okul öncesi öğretmenliği	Adana	Evet, kullanıyorum.	Evet, kullanıyorum.	ChatGPT	Hayır, kullanmıyorum.		Hayır, kullanmıyorum.		2	Ara sıra kullanırım	Nadiren kullanırım	Hiç kullanmam	Ara sıra kullanırım	Hiç kullanmam	Hiç kullanmam	Hiç kullanmam	Hiç kullanmam	Hiç kullanmam	Hiç kullanmam	Hiç kullanmam		Son 1 ay içinde	1		Eğitim / Öğrenme, Eğlence	Hiç yetkin hissetmiyorum	Pek önemli değil	Kararsızım	Kararsızım	Kararsızım	Katılıyorum	Katılıyorum	Katılıyorum	Katılıyorum	Katılıyorum	Katılmıyorum	Katılıyorum	Kararsızım	Katılıyorum	Katılıyorum	Katılıyorum	Katılıyorum	Kararsızım	Katılıyorum	Kararsızım
2025-05-05 00:12:05	Kadın		Yüksek Lisans	Radyo televizyon ve sinema - yüksek lisans	Konya	Evet, kullanıyorum.	Evet, kullanıyorum.	ChatGPT	Hayır, kullanmıyorum.		Hayır, kullanmıyorum.		3	Çok sık kullanırım												Bugün	1		Eğitim / Öğrenme, İçerik Üretimi (metin, görsel, ses), İş / Mesleki Amaçlar	Yetkinim	Orta düzeyde önemli	Kesinlikle Katılıyorum	Kesinlikle Katılıyorum	Kesinlikle Katılıyorum	Kesinlikle Katılıyorum	Kesinlikle Katılıyorum	Kesinlikle Katılıyorum	Kesinlikle Katılıyorum	Kesinlikle Katılıyorum	Kesinlikle Katılıyorum	Kesinlikle Katılıyorum	Kesinlikle katılıyorum	Katılıyorum	Katılıyorum	Katılıyorum	Katılıyorum	Katılıyorum	Katılıyorum	Katılıyorum
2025-05-05 00:17:21	Kadın		Yüksek Lisans	radyo televizyon ana bilim dalı yüksek lisans	konya	Evet, kullanıyorum.	Evet, kullanıyorum.	ChatGPT, Bearly Ai	Hayır, kullanmıyorum.		Hayır, kullanmıyorum.		4	Sık kullanırım	Hiç kullanmam	Hiç kullanmam	Nadiren kullanırım	Hiç kullanmam	Hiç kullanmam	Hiç kullanmam	Nadiren kullanırım	Hiç kullanmam	Hiç kullanmam	Hiç kullanmam		Son 1 hafta içinde	1		Eğitim / Öğrenme, İçerik Üretimi (metin, görsel, ses), İş / Mesleki Amaçlar, Günlük İşler (takvim, e-posta, öneriler vs.), Eğlence	Biraz yetkinim	Orta düzeyde önemli	Kesinlikle Katılıyorum	Kesinlikle Katılıyorum	Katılıyorum	Kesinlikle Katılıyorum	Kesinlikle Katılıyorum	Kararsızım	Kararsızım	Katılmıyorum	Kararsızım	Kararsızım	Katılıyorum	Kesinlikle katılıyorum	Kesinlikle katılıyorum	Kesinlikle katılıyorum	Kesinlikle katılıyorum	Kararsızım	Katılıyorum	Kesinlikle katılıyorum
2025-05-05 00:18:43	Kadın		Yüksek Lisans	Radyo, Televizyon ve Sinema Yüksek Lisans	Konya	Evet, kullanıyorum.	Evet, kullanıyorum.	ChatGPT, DeepSeek, Copilot	Hayır, kullanmıyorum.		Evet, kullanıyorum.	Suno	5	Çok sık kullanırım	Ara sıra kullanırım	Ara sıra kullanırım	Sık kullanırım	Sık kullanırım	Ara sıra kullanırım	Ara sıra kullanırım	Ara sıra kullanırım	Ara sıra kullanırım	Ara sıra kullanırım	Ara sıra kullanırım		Bugün	1		Eğitim / Öğrenme	Biraz yetkinim	Orta düzeyde önemli	Kesinlikle Katılıyorum	Katılıyorum	Kesinlikle Katılıyorum	Kesinlikle Katılıyorum	Katılıyorum	Kesinlikle Katılıyorum	Katılıyorum	Kesinlikle Katılıyorum	Kararsızım	Kesinlikle Katılıyorum	Kesinlikle katılıyorum	Katılıyorum	Katılıyorum	Katılıyorum	Katılıyorum	Katılıyorum	Katılıyorum	Katılıyorum
2025-05-05 00:19:08	Kadın		Lisans	okul öncesi öğretmenliği-mezun	adana	Evet, kullanıyorum.	Evet, kullanıyorum.	ChatGPT	Hayır, kullanmıyorum.		Hayır, kullanmıyorum.		2	Ara sıra kullanırım	Hiç kullanmam	Hiç kullanmam	Hiç kullanmam	Hiç kullanmam	Hiç kullanmam	Hiç kullanmam	Hiç kullanmam	Hiç kullanmam	Hiç kullanmam	Hiç kullanmam		Daha uzun süre önce	1		Eğitim / Öğrenme	Biraz yetkinim	Orta düzeyde önemli	Katılmıyorum	Katılmıyorum	Katılıyorum	Katılıyorum	Katılıyorum	Katılıyorum	Katılıyorum	Katılıyorum	Kararsızım	Kararsızım	Katılmıyorum	Katılıyorum	Kararsızım	Katılıyorum	Katılıyorum	Kararsızım	Katılıyorum	Katılıyorum
2025-05-05 01:29:11	Kadın		Lisans	Hemşirelik-1.sınıf	Çankırı	Evet, kullanıyorum.	Evet, kullanıyorum.	ChatGPT	Hayır, kullanmıyorum.		Hayır, kullanmıyorum.		3	Ara sıra kullanırım	Hiç kullanmam	Hiç kullanmam	Hiç kullanmam	Hiç kullanmam	Hiç kullanmam	Hiç kullanmam	Hiç kullanmam	Hiç kullanmam	Hiç kullanmam	Hiç kullanmam		Son 1 hafta içinde	1	0 tl	Eğitim / Öğrenme, İçerik Üretimi (metin, görsel, ses), Eğlence	Biraz yetkinim	Orta düzeyde önemli	Katılıyorum	Katılıyorum	Katılıyorum	Katılıyorum	Katılıyorum	Katılıyorum	Katılıyorum	Katılıyorum	Kararsızım	Kararsızım	Katılıyorum	Katılıyorum	Katılıyorum	Katılıyorum	Katılıyorum	Katılıyorum	Katılıyorum	Katılıyorum
2025-05-05 08:09:03	Kadın		Lisans	Gazetecilik - 4.Sınıf	Ankara	Evet, kullanıyorum.	Evet, kullanıyorum.	ChatGPT	Hayır, kullanmıyorum.		Hayır, kullanmıyorum.		3	Ara sıra kullanırım	Hiç kullanmam	Hiç kullanmam	Hiç kullanmam	Hiç kullanmam	Hiç kullanmam	Hiç kullanmam	Hiç kullanmam	Hiç kullanmam	Hiç kullanmam	Hiç kullanmam	Hiç kullanmam	Son 1 hafta içinde	1	Henüz hiç ücret ödemedim.	İçerik Üretimi (metin, görsel, ses), Eğlence	Biraz yetkinim	Pek önemli değil	Kesinlikle Katılıyorum	Kararsızım	Katılıyorum	Kararsızım	Katılıyorum	Katılıyorum	Katılmıyorum	Katılmıyorum	Katılıyorum	Kararsızım	Katılıyorum	Katılıyorum	Katılıyorum	Hiç katılmıyorum	Katılmıyorum	Kararsızım	Katılıyorum	Katılıyorum
2025-05-05 10:30:26	Erkek		Yüksek Lisans	Gazetecilik 1.Sınıf	Konya	Hayır, kullanmıyorum.
2025-05-05 10:31:12	Erkek		Lisans	Halkla İlişkiler 4.Sınıf	Konya	Hayır, kullanmıyorum.
2025-05-05 11:22:32	Kadın		Yüksek Lisans		Konya	Evet, kullanıyorum.	Evet, kullanıyorum.	ChatGPT, Gemini	Hayır, kullanmıyorum.		Hayır, kullanmıyorum.		4	Sık kullanırım	Ara sıra kullanırım											Son 1 hafta içinde	1		Eğitim / Öğrenme, İçerik Üretimi (metin, görsel, ses), İş / Mesleki Amaçlar	Orta düzeyde yetkinim	Önemli	Katılıyorum	Katılıyorum	Kararsızım	Katılıyorum	Katılıyorum	Katılıyorum	Katılıyorum	Katılıyorum	Katılıyorum	Katılıyorum	Katılıyorum	Katılıyorum	Katılıyorum	Katılıyorum	Katılıyorum	Katılıyorum	Katılıyorum	Katılıyorum
2025-05-05 14:33:07	Kadın		Yüksek Lisans	Radyp Tv Sinema yüksek lisans	Antalya	Evet, kullanıyorum.	Evet, kullanıyorum.	ChatGPT, DeepSeek, Copilot	Evet, kullanıyorum.	Dall-E	Hayır, kullanmıyorum.		5	Ara sıra kullanırım		Nadiren kullanırım		Nadiren kullanırım								Bugün	5	500 tl	Eğitim / Öğrenme, İçerik Üretimi (metin, görsel, ses), Günlük İşler (takvim, e-posta, öneriler vs.)	Orta düzeyde yetkinim	Vazgeçilmez	Kesinlikle Katılıyorum	Kesinlikle Katılıyorum	Kesinlikle Katılıyorum	Kesinlikle Katılıyorum	Kesinlikle Katılıyorum	Kesinlikle Katılıyorum	Kesinlikle Katılıyorum	Kararsızım	Kararsızım	Katılıyorum	Kesinlikle katılıyorum	Kesinlikle katılıyorum	Kesinlikle katılıyorum	Kararsızım	Kesinlikle katılıyorum	Katılıyorum	Kesinlikle katılıyorum	Kararsızım
2025-05-05 21:35:36	Kadın		Lisans	Spor yöneticiliği mezun	uşak	Evet, kullanıyorum.	Evet, kullanıyorum.	ChatGPT	Hayır, kullanmıyorum.		Hayır, kullanmıyorum.		5	Çok sık kullanırım												Bugün	1		Eğitim / Öğrenme, İçerik Üretimi (metin, görsel, ses), Günlük İşler (takvim, e-posta, öneriler vs.), Eğlence	Yetkinim	Orta düzeyde önemli	Kararsızım	Kararsızım	Kararsızım	Kararsızım	Kararsızım	Kararsızım	Kararsızım	Kararsızım	Kararsızım	Kararsızım	Katılıyorum	Katılıyorum	Katılıyorum	Katılıyorum	Katılıyorum	Katılıyorum	Katılıyorum	Katılıyorum
2025-05-05 21:56:12	Kadın		Lisans	Sosyal Hizmet -3. sınıf	Konya	Evet, kullanıyorum.	Evet, kullanıyorum.	ChatGPT, Gemini	Hayır, kullanmıyorum.		Hayır, kullanmıyorum.		3	Sık kullanırım	Çok sık kullanırım	Hiç kullanmam	Hiç kullanmam	Hiç kullanmam	Hiç kullanmam	Hiç kullanmam	Hiç kullanmam	Hiç kullanmam	Hiç kullanmam	Hiç kullanmam	Hiç kullanmam	Bugün	1		Eğitim / Öğrenme, İş / Mesleki Amaçlar, Günlük İşler (takvim, e-posta, öneriler vs.)	Biraz yetkinim	Orta düzeyde önemli	Kesinlikle Katılıyorum	Kesinlikle Katılıyorum	Kesinlikle Katılıyorum	Kesinlikle Katılıyorum	Kesinlikle Katılıyorum	Kesinlikle Katılıyorum	Kesinlikle Katılıyorum	Kesinlikle Katılıyorum	Hiç katılmıyorum	Kesinlikle Katılıyorum	Katılıyorum	Katılıyorum	Kararsızım	Kararsızım	Katılmıyorum	Katılmıyorum	Kesinlikle katılıyorum	Kesinlikle katılıyorum
2025-05-05 22:09:16	Kadın		Lisans	Sosyal Hizmet - 3.sınıf	Konya	Evet, kullanıyorum.	Evet, kullanıyorum.	ChatGPT, Gemini	Hayır, kullanmıyorum.		Hayır, kullanmıyorum.		2	Nadiren kullanırım	Nadiren kullanırım											Son 1 hafta içinde	1	0 TL	Eğitim / Öğrenme, İçerik Üretimi (metin, görsel, ses), Eğlence	Biraz yetkinim	Pek önemli değil	Katılıyorum	Kararsızım	Kararsızım	Katılıyorum	Kararsızım	Katılıyorum	Kararsızım	Katılıyorum	Hiç katılmıyorum	Kesinlikle Katılıyorum	Katılıyorum	Katılıyorum	Katılıyorum	Katılıyorum	Katılıyorum	Katılmıyorum	Katılıyorum	Kararsızım
2025-05-05 22:46:27	Kadın		Lisans			Evet, kullanıyorum.	Evet, kullanıyorum.	ChatGPT	Hayır, kullanmıyorum.		Hayır, kullanmıyorum.		5	Çok sık kullanırım												Bugün	1		Eğitim / Öğrenme	Yetkinim	Vazgeçilmez	Katılıyorum	Kararsızım	Kesinlikle Katılıyorum	Kesinlikle Katılıyorum	Kararsızım	Kararsızım	Kararsızım	Kararsızım	Kararsızım	Kararsızım	Kesinlikle katılıyorum	Kesinlikle katılıyorum	Kesinlikle katılıyorum	Kesinlikle katılıyorum	Kesinlikle katılıyorum	Kararsızım	Katılıyorum	Katılıyorum
2025-05-05 22:51:52	Kadın		Lisans	Resim bölümü-3.sınıf	Konya	Evet, kullanıyorum.	Evet, kullanıyorum.	ChatGPT	Hayır, kullanmıyorum.		Hayır, kullanmıyorum.		4	Çok sık kullanırım	Ara sıra kullanırım											Bugün	1	0	Eğitim / Öğrenme, İş / Mesleki Amaçlar	Biraz yetkinim	Önemli	Kararsızım	Kararsızım	Katılıyorum	Katılıyorum	Kararsızım	Katılıyorum	Katılıyorum	Kararsızım	Katılmıyorum	Kararsızım	Katılıyorum	Katılıyorum	Katılmıyorum	Kararsızım	Katılıyorum	Katılıyorum	Katılıyorum	Katılıyorum
2025-05-05 23:56:00	Erkek	21	Lisans	Hemşirelik 4.sınıf	Konya	Evet, kullanıyorum.	Evet, kullanıyorum.	ChatGPT	Hayır, kullanmıyorum.		Hayır, kullanmıyorum.		3	Ara sıra kullanırım												Son 1 ay içinde	1	0tl	Eğitim / Öğrenme, İçerik Üretimi (metin, görsel, ses)	Biraz yetkinim	Pek önemli değil	Katılıyorum	Katılıyorum	Katılıyorum	Katılıyorum	Katılıyorum	Katılıyorum	Katılıyorum	Kararsızım	Katılmıyorum	Katılıyorum	Kararsızım	Kararsızım	Kararsızım	Katılıyorum	Katılıyorum	Kararsızım	Katılıyorum	Katılıyorum
2025-05-06 00:40:10	Kadın	24	Lisans	Radyo, TV ve sinema	Konya	Evet, kullanıyorum.	Evet, kullanıyorum.	ChatGPT	Evet, kullanıyorum.	Midjourney, Dall-E, Leonardo.ai	Hayır, kullanmıyorum.		3	Ara sıra kullanırım	Hiç kullanmam	Hiç kullanmam	Hiç kullanmam	Hiç kullanmam	Hiç kullanmam	Nadiren kullanırım	Nadiren kullanırım	Hiç kullanmam	Hiç kullanmam	Hiç kullanmam	Hiç kullanmam	Son 1 hafta içinde	1	0	Eğitim / Öğrenme, İçerik Üretimi (metin, görsel, ses), İş / Mesleki Amaçlar, Günlük İşler (takvim, e-posta, öneriler vs.), Eğlence	Orta düzeyde yetkinim	Pek önemli değil	Katılıyorum	Kararsızım	Katılıyorum	Katılıyorum	Katılıyorum	Katılıyorum	Katılıyorum	Katılıyorum	Katılmıyorum	Katılıyorum	Katılıyorum	Katılıyorum	Kararsızım	Kararsızım	Katılıyorum	Katılıyorum	Katılıyorum	Katılıyorum
2025-05-06 07:01:43	Kadın	22	Lisans	Hemşirelik 3. Sınıf	Ankara	Evet, kullanıyorum.	Evet, kullanıyorum.	ChatGPT, Gemini	Hayır, kullanmıyorum.		Hayır, kullanmıyorum.		3	Çok sık kullanırım	Ara sıra kullanırım	Hiç kullanmam	Hiç kullanmam	Hiç kullanmam	Hiç kullanmam	Hiç kullanmam	Hiç kullanmam	Hiç kullanmam	Hiç kullanmam	Hiç kullanmam	Hiç kullanmam	Son 1 hafta içinde	1		Eğitim / Öğrenme, İçerik Üretimi (metin, görsel, ses), Günlük İşler (takvim, e-posta, öneriler vs.)	Biraz yetkinim	Pek önemli değil	Katılıyorum	Hiç katılmıyorum	Kararsızım	Kararsızım	Katılıyorum	Katılıyorum	Kararsızım	Kararsızım	Kararsızım	Kesinlikle Katılıyorum	Kararsızım	Kesinlikle katılıyorum	Katılıyorum	Katılıyorum	Kararsızım	Kararsızım	Katılıyorum	Kararsızım
2025-05-06 09:46:45	Kadın	25	Lisans	Radyo televizyon ve sinema - mezun	konya	Evet, kullanıyorum.	Evet, kullanıyorum.	ChatGPT	Hayır, kullanmıyorum.		Hayır, kullanmıyorum.		4	Çok sık kullanırım	Hiç kullanmam	Hiç kullanmam	Hiç kullanmam	Hiç kullanmam	Hiç kullanmam	Hiç kullanmam	Hiç kullanmam	Hiç kullanmam	Hiç kullanmam	Hiç kullanmam	Hiç kullanmam	Bugün	1		Günlük İşler (takvim, e-posta, öneriler vs.)	Hiç yetkin hissetmiyorum	Önemli	Katılıyorum	Katılıyorum	Katılmıyorum	Katılıyorum	Katılıyorum	Katılıyorum	Katılıyorum	Kararsızım	Katılmıyorum	Katılmıyorum	Katılıyorum	Katılıyorum	Katılıyorum	Katılıyorum	Katılıyorum	Kararsızım	Katılıyorum	Katılıyorum
2025-05-06 09:47:20	Kadın	33	Lisans	resim öğretmenliği - mezun	konya	Evet, kullanıyorum.	Evet, kullanıyorum.	ChatGPT	Evet, kullanıyorum.	Midjourney	Hayır, kullanmıyorum.		3	Sık kullanırım	Ara sıra kullanırım	Hiç kullanmam	Hiç kullanmam	Hiç kullanmam	Hiç kullanmam	Sık kullanırım	Hiç kullanmam	Hiç kullanmam	Hiç kullanmam	Hiç kullanmam	Hiç kullanmam	Son 1 hafta içinde	3		İçerik Üretimi (metin, görsel, ses), İş / Mesleki Amaçlar	Biraz yetkinim	Pek önemli değil	Katılıyorum	Kararsızım	Katılmıyorum	Katılıyorum	Kararsızım	Kararsızım	Kararsızım	Kararsızım	Kararsızım	Kararsızım	Katılıyorum	Katılıyorum	Katılıyorum	Kararsızım	Kararsızım	Katılıyorum	Katılıyorum	Kararsızım
2025-05-06 09:50:51	Kadın	23	Lisans	Bilgisayar Mühendisliği 3. Sınıf	Konya	Evet, kullanıyorum.	Evet, kullanıyorum.	ChatGPT, DeepSeek	Evet, kullanıyorum.	ChatGbtden yapıyorum	Hayır, kullanmıyorum.		4	Çok sık kullanırım	Hiç kullanmam	Sık kullanırım	Hiç kullanmam	Hiç kullanmam	Hiç kullanmam	Hiç kullanmam	Hiç kullanmam	Hiç kullanmam	Hiç kullanmam	Hiç kullanmam	Hiç kullanmam	Bugün	1	20 USD	Eğitim / Öğrenme, İçerik Üretimi (metin, görsel, ses), İş / Mesleki Amaçlar, Günlük İşler (takvim, e-posta, öneriler vs.), Eğlence, Terapi	Çok yetkinim	Vazgeçilmez	Kesinlikle Katılıyorum	Kesinlikle Katılıyorum	Kesinlikle Katılıyorum	Kesinlikle Katılıyorum	Kesinlikle Katılıyorum	Kesinlikle Katılıyorum	Kesinlikle Katılıyorum	Kesinlikle Katılıyorum	Katılmıyorum	Kesinlikle Katılıyorum	Kesinlikle katılıyorum	Kesinlikle katılıyorum	Kesinlikle katılıyorum	Katılmıyorum	Kesinlikle katılıyorum	Kesinlikle katılıyorum	Kesinlikle katılıyorum	Katılmıyorum
2025-05-06 09:52:34	Kadın	21	Lisans	Moleküler Biyoloji ve Genetik 2.sınıf	konya	Evet, kullanıyorum.	Evet, kullanıyorum.	ChatGPT, Gemini	Hayır, kullanmıyorum.		Hayır, kullanmıyorum.		5	Çok sık kullanırım	Ara sıra kullanırım	Hiç kullanmam	Hiç kullanmam	Hiç kullanmam	Hiç kullanmam	Hiç kullanmam	Hiç kullanmam	Hiç kullanmam	Hiç kullanmam	Hiç kullanmam	Hiç kullanmam	Bugün	1		Eğitim / Öğrenme, İçerik Üretimi (metin, görsel, ses), İş / Mesleki Amaçlar	Orta düzeyde yetkinim	Önemli	Katılıyorum	Katılmıyorum	Katılıyorum	Katılıyorum	Katılıyorum	Katılıyorum	Katılıyorum	Katılıyorum	Katılmıyorum	Katılıyorum	Kararsızım	Katılıyorum	Katılıyorum	Katılıyorum	Katılıyorum	Katılmıyorum	Katılıyorum	Katılıyorum
2025-05-06 09:54:39	Kadın	29	Yüksek Lisans	Gıda Mühendisliği- Mezun	Konya	Evet, kullanıyorum.	Evet, kullanıyorum.	ChatGPT, Gemini, DeepSeek	Evet, kullanıyorum.	Leonardo.ai	Hayır, kullanmıyorum.		3	Sık kullanırım	Ara sıra kullanırım	Ara sıra kullanırım										Son 1 hafta içinde	1		Eğitim / Öğrenme, İçerik Üretimi (metin, görsel, ses), Eğlence	Biraz yetkinim	Orta düzeyde önemli	Kararsızım	Katılmıyorum	Katılıyorum	Katılıyorum	Katılıyorum	Katılıyorum	Kararsızım	Kesinlikle Katılıyorum	Kararsızım	Katılıyorum	Katılıyorum	Katılıyorum	Katılıyorum	Kararsızım	Kararsızım	Katılıyorum	Katılıyorum	Katılıyorum
2025-05-06 09:59:04	Erkek	27	Yüksek Lisans	halkla ilişkiler ve reklamcılık - YL	Konya	Evet, kullanıyorum.	Evet, kullanıyorum.	ChatGPT, Gemini, Perplexity, freepik, piri ai	Evet, kullanıyorum.	Dall-E, Leonardo.ai, Sora, freepik	Evet, kullanıyorum.	Elevenlabs, Suno	5	Çok sık kullanırım	Çok sık kullanırım				Çok sık kullanırım		Ara sıra kullanırım			Nadiren kullanırım		Son 1 hafta içinde	5	20 usd	Eğitim / Öğrenme, İçerik Üretimi (metin, görsel, ses), İş / Mesleki Amaçlar, Günlük İşler (takvim, e-posta, öneriler vs.)	Orta düzeyde yetkinim	Önemli	Katılıyorum	Katılıyorum	Katılıyorum	Kesinlikle Katılıyorum	Kararsızım	Katılıyorum	Katılıyorum	Katılıyorum	Hiç katılmıyorum	Kesinlikle Katılıyorum	Kesinlikle katılıyorum	Kesinlikle katılıyorum	Kesinlikle katılıyorum	Kesinlikle katılıyorum	Kesinlikle katılıyorum	Katılıyorum	Kesinlikle katılıyorum	Kesinlikle katılıyorum
2025-05-06 10:21:10	Kadın	25	Lisans	Mimarlık-Mezun	KONYA	Evet, kullanıyorum.	Evet, kullanıyorum.	ChatGPT	Evet, kullanıyorum.	Midjourney	Hayır, kullanmıyorum.		5	Çok sık kullanırım	Sık kullanırım	Nadiren kullanırım	Sık kullanırım	Hiç kullanmam	Nadiren kullanırım	Sık kullanırım	Hiç kullanmam	Hiç kullanmam	Sık kullanırım	Nadiren kullanırım	Hiç kullanmam	Bugün	4	1000	Eğitim / Öğrenme, İçerik Üretimi (metin, görsel, ses), İş / Mesleki Amaçlar, Günlük İşler (takvim, e-posta, öneriler vs.), Eğlence	Orta düzeyde yetkinim	Vazgeçilmez	Katılıyorum	Kararsızım	Kesinlikle Katılıyorum	Kesinlikle Katılıyorum	Kesinlikle Katılıyorum	Kesinlikle Katılıyorum	Katılıyorum	Katılmıyorum	Kesinlikle Katılıyorum	Kararsızım	Kesinlikle katılıyorum	Kesinlikle katılıyorum	Kesinlikle katılıyorum	Kesinlikle katılıyorum	Kesinlikle katılıyorum	Kararsızım	Kesinlikle katılıyorum	Katılmıyorum
2025-05-06 10:29:48	Kadın	31	Yüksek Lisans	Bilgisayar ve Öğretim Teknolojileri Öğretmenliği - Mezun	KONYA	Evet, kullanıyorum.	Evet, kullanıyorum.	ChatGPT, Gemini, Grok, Copilot	Evet, kullanıyorum.	Dall-E, Flux	Evet, kullanıyorum.	Suno	4	Çok sık kullanırım	Çok sık kullanırım	Hiç kullanmam	Sık kullanırım	Ara sıra kullanırım	Hiç kullanmam	Nadiren kullanırım	Sık kullanırım	Sık kullanırım	Hiç kullanmam	Ara sıra kullanırım	Hiç kullanmam	Bugün	2		Eğitim / Öğrenme, İçerik Üretimi (metin, görsel, ses), İş / Mesleki Amaçlar, Günlük İşler (takvim, e-posta, öneriler vs.)	Yetkinim	Orta düzeyde önemli	Katılıyorum	Kararsızım	Kesinlikle Katılıyorum	Kesinlikle Katılıyorum	Katılıyorum	Kesinlikle Katılıyorum	Katılıyorum	Kesinlikle Katılıyorum	Hiç katılmıyorum	Katılıyorum	Kesinlikle katılıyorum	Kesinlikle katılıyorum	Kesinlikle katılıyorum	Kesinlikle katılıyorum	Kesinlikle katılıyorum	Kararsızım	Katılıyorum	Kesinlikle katılıyorum
2025-05-06 11:25:10	Erkek	25	Lisans	Mimarlık - Mezun	Konya	Evet, kullanıyorum.	Evet, kullanıyorum.	ChatGPT, Perplexity, Claude	Evet, kullanıyorum.	Midjourney, Dall-E	Hayır, kullanmıyorum.		4	Çok sık kullanırım	Nadiren kullanırım	Hiç kullanmam	Hiç kullanmam	Hiç kullanmam	Ara sıra kullanırım	Sık kullanırım	Sık kullanırım	Hiç kullanmam	Hiç kullanmam	Hiç kullanmam	Hiç kullanmam	Bugün	1		İş / Mesleki Amaçlar, Günlük İşler (takvim, e-posta, öneriler vs.)	Biraz yetkinim	Önemli	Katılıyorum	Katılıyorum	Katılıyorum	Katılıyorum	Kararsızım	Katılıyorum	Kesinlikle Katılıyorum	Katılmıyorum	Kararsızım	Kararsızım	Kesinlikle katılıyorum	Kesinlikle katılıyorum	Kesinlikle katılıyorum	Katılıyorum	Kesinlikle katılıyorum	Kesinlikle katılıyorum	Kesinlikle katılıyorum	Kesinlikle katılıyorum
2025-05-06 11:35:06	Kadın	25	Lisans	İlköğretim matematik öğretmenliği-3.sınıf	Konya	Evet, kullanıyorum.	Evet, kullanıyorum.	ChatGPT, Gemini, DeepSeek	Evet, kullanıyorum.	Midjourney, Dall-E, Leonardo.ai	Evet, kullanıyorum.	Suno	4	Sık kullanırım	Ara sıra kullanırım	Ara sıra kullanırım	Hiç kullanmam	Nadiren kullanırım	Hiç kullanmam	Ara sıra kullanırım	Ara sıra kullanırım	Hiç kullanmam	Hiç kullanmam	Nadiren kullanırım	Hiç kullanmam	Son 1 hafta içinde	1		Eğitim / Öğrenme, İçerik Üretimi (metin, görsel, ses), Günlük İşler (takvim, e-posta, öneriler vs.), Eğlence	Orta düzeyde yetkinim	Orta düzeyde önemli	Kesinlikle Katılıyorum	Kararsızım	Kararsızım	Katılıyorum	Kararsızım	Katılıyorum	Katılıyorum	Katılmıyorum	Kararsızım	Katılıyorum	Kesinlikle katılıyorum	Kesinlikle katılıyorum	Katılıyorum	Katılıyorum	Kesinlikle katılıyorum	Katılıyorum	Katılıyorum	Katılıyorum
2025-05-06 11:37:30	Erkek	24	Lisans	Bilgisayar Mühendisliği - 3. Sınıf	Konya	Evet, kullanıyorum.	Evet, kullanıyorum.	ChatGPT, Claud.ai	Evet, kullanıyorum.	Midjourney	Hayır, kullanmıyorum.		5	Çok sık kullanırım	Ara sıra kullanırım	Nadiren kullanırım	Hiç kullanmam	Hiç kullanmam	Hiç kullanmam	Ara sıra kullanırım	Hiç kullanmam	Hiç kullanmam	Hiç kullanmam	Hiç kullanmam	Hiç kullanmam	Son 1 hafta içinde	2	20 Usd	Eğitim / Öğrenme, İçerik Üretimi (metin, görsel, ses), İş / Mesleki Amaçlar, Eğlence	Orta düzeyde yetkinim	Orta düzeyde önemli	Kesinlikle Katılıyorum	Katılıyorum	Katılıyorum	Katılıyorum	Kararsızım	Katılıyorum	Katılıyorum	Katılmıyorum	Katılmıyorum	Kararsızım	Katılıyorum	Kesinlikle katılıyorum	Katılıyorum	Kararsızım	Kesinlikle katılıyorum	Kararsızım	Kararsızım	Katılıyorum
2025-05-06 12:07:13	Kadın	24	Lisans	Felsefe PR. - 4. Sınıf	Konya	Evet, kullanıyorum.	Evet, kullanıyorum.	ChatGPT	Hayır, kullanmıyorum.		Hayır, kullanmıyorum.		1	Ara sıra kullanırım	Hiç kullanmam	Hiç kullanmam	Hiç kullanmam	Hiç kullanmam	Hiç kullanmam	Hiç kullanmam	Hiç kullanmam	Hiç kullanmam	Hiç kullanmam	Hiç kullanmam	Hiç kullanmam	Bugün	1		Eğitim / Öğrenme	Hiç yetkin hissetmiyorum	Hiç önemli değil	Kesinlikle Katılıyorum	Katılıyorum	Kararsızım	Kararsızım	Katılıyorum	Hiç katılmıyorum	Kararsızım	Kesinlikle Katılıyorum	Hiç katılmıyorum	Kesinlikle Katılıyorum	Katılmıyorum	Kararsızım	Hiç katılmıyorum	Hiç katılmıyorum	Katılmıyorum	Hiç katılmıyorum	Hiç katılmıyorum	Hiç katılmıyorum
2025-05-06 16:52:10	Erkek	28	Doktora	İslam Bilim Tarihi Doktora Öğrencisi	Konya	Evet, kullanıyorum.	Evet, kullanıyorum.	ChatGPT	Evet, kullanıyorum.	Midjourney, Dall-E	Evet, kullanıyorum.	Elevenlabs, Suno	4	Sık kullanırım	Nadiren kullanırım	Nadiren kullanırım	Nadiren kullanırım	Nadiren kullanırım	Nadiren kullanırım	Sık kullanırım	Sık kullanırım	Nadiren kullanırım	Hiç kullanmam	Hiç kullanmam	Hiç kullanmam	Bugün	1	200	Eğitim / Öğrenme, İş / Mesleki Amaçlar, Günlük İşler (takvim, e-posta, öneriler vs.)	Yetkinim	Önemli	Katılıyorum	Katılıyorum	Katılıyorum	Kararsızım	Katılıyorum	Katılıyorum	Katılıyorum	Katılıyorum	Katılmıyorum	Kararsızım	Katılıyorum	Katılıyorum	Katılıyorum	Katılıyorum	Kesinlikle katılıyorum	Kesinlikle katılıyorum	Kesinlikle katılıyorum	Kesinlikle katılıyorum
2025-05-06 21:36:06	Erkek	25	Lisans	İşletme	Konya	Evet, kullanıyorum.	Evet, kullanıyorum.	ChatGPT, Gamma	Evet, kullanıyorum.	Midjourney, Leonardo.ai, Sora	Hayır, kullanmıyorum.		5	Çok sık kullanırım	Nadiren kullanırım	Hiç kullanmam	Hiç kullanmam	Nadiren kullanırım	Hiç kullanmam	Ara sıra kullanırım	Hiç kullanmam	Hiç kullanmam	Hiç kullanmam	Ara sıra kullanırım	Hiç kullanmam	Bugün	1	0	Eğitim / Öğrenme, İçerik Üretimi (metin, görsel, ses), İş / Mesleki Amaçlar, Günlük İşler (takvim, e-posta, öneriler vs.), Eğlence	Orta düzeyde yetkinim	Önemli	Katılıyorum	Katılıyorum	Kararsızım	Kesinlikle Katılıyorum	Kesinlikle Katılıyorum	Katılıyorum	Katılıyorum	Kesinlikle Katılıyorum	Kararsızım	Katılıyorum	Kesinlikle katılıyorum	Katılıyorum	Katılıyorum	Kesinlikle katılıyorum	Kesinlikle katılıyorum	Kararsızım	Kesinlikle katılıyorum	Kesinlikle katılıyorum
2025-05-06 23:06:47	Kadın	21	Lisans	Sanat Tarihi 2.Sınıf	Konya	Evet, kullanıyorum.	Evet, kullanıyorum.	ChatGPT	Hayır, kullanmıyorum.		Hayır, kullanmıyorum.		5	Çok sık kullanırım	Ara sıra kullanırım	Hiç kullanmam	Hiç kullanmam	Hiç kullanmam	Hiç kullanmam	Hiç kullanmam	Hiç kullanmam	Hiç kullanmam	Hiç kullanmam	Hiç kullanmam	Hiç kullanmam	Bugün	3	500 tl	Eğitim / Öğrenme, İçerik Üretimi (metin, görsel, ses), İş / Mesleki Amaçlar, Günlük İşler (takvim, e-posta, öneriler vs.), Eğlence	Yetkinim	Vazgeçilmez	Kesinlikle Katılıyorum	Katılıyorum	Kesinlikle Katılıyorum	Kesinlikle Katılıyorum	Kesinlikle Katılıyorum	Kesinlikle Katılıyorum	Katılıyorum	Kesinlikle Katılıyorum	Hiç katılmıyorum	Kesinlikle Katılıyorum	Kesinlikle katılıyorum	Kesinlikle katılıyorum	Kesinlikle katılıyorum	Kararsızım	Kesinlikle katılıyorum	Kesinlikle katılıyorum	Kesinlikle katılıyorum	Katılıyorum
2025-05-06 23:22:21	Kadın	21	Lisans	fizyoterapi 1	konya	Evet, kullanıyorum.	Evet, kullanıyorum.	ChatGPT, Gemini	Hayır, kullanmıyorum.		Hayır, kullanmıyorum.		3	Sık kullanırım	Ara sıra kullanırım	Hiç kullanmam	Hiç kullanmam	Hiç kullanmam	Hiç kullanmam	Hiç kullanmam	Hiç kullanmam	Hiç kullanmam	Hiç kullanmam	Hiç kullanmam	Hiç kullanmam	Son 1 hafta içinde	1	0	İçerik Üretimi (metin, görsel, ses), Günlük İşler (takvim, e-posta, öneriler vs.)	Biraz yetkinim	Pek önemli değil	Kararsızım	Kararsızım	Katılıyorum	Katılıyorum	Kesinlikle Katılıyorum	Kesinlikle Katılıyorum	Katılıyorum	Katılıyorum	Katılıyorum	Kararsızım	Katılıyorum	Katılıyorum	Katılıyorum	Katılıyorum	Katılıyorum	Katılıyorum	Katılıyorum	Katılıyorum
2025-05-06 23:49:27	Kadın	23	Lisans	Edebiyat	Ağrı	Evet, kullanıyorum.	Evet, kullanıyorum.	ChatGPT, Gemini, Grok	Hayır, kullanmıyorum.		Hayır, kullanmıyorum.		2	Sık kullanırım	Hiç kullanmam	Hiç kullanmam	Sık kullanırım	Hiç kullanmam	Hiç kullanmam	Hiç kullanmam	Hiç kullanmam	Hiç kullanmam	Hiç kullanmam	Hiç kullanmam	Hiç kullanmam	Son 1 hafta içinde	1		Eğitim / Öğrenme, Eğlence	Hiç yetkin hissetmiyorum	Orta düzeyde önemli	Katılıyorum	Katılıyorum	Katılıyorum	Katılıyorum	Katılıyorum	Katılıyorum	Katılıyorum	Katılıyorum	Katılıyorum	Katılıyorum	Katılıyorum	Katılıyorum	Katılıyorum	Katılıyorum	Katılıyorum	Katılıyorum	Katılıyorum	Katılıyorum
2025-05-06 23:50:48	Kadın	23	Lisans	Moleküler biyoloji be genetik 3. Sınıf	Konya	Evet, kullanıyorum.	Evet, kullanıyorum.	ChatGPT, Gemini, DeepSeek	Hayır, kullanmıyorum.		Hayır, kullanmıyorum.		5	Çok sık kullanırım	Sık kullanırım	Sık kullanırım	Hiç kullanmam	Hiç kullanmam	Hiç kullanmam	Hiç kullanmam	Hiç kullanmam	Hiç kullanmam	Hiç kullanmam	Hiç kullanmam	Hiç kullanmam	Bugün	1		Eğitim / Öğrenme, İş / Mesleki Amaçlar	Orta düzeyde yetkinim	Önemli	Katılıyorum	Katılıyorum	Katılıyorum	Kesinlikle Katılıyorum	Kesinlikle Katılıyorum	Kesinlikle Katılıyorum	Katılıyorum	Kararsızım	Kararsızım	Kararsızım	Kesinlikle katılıyorum	Kesinlikle katılıyorum	Kesinlikle katılıyorum	Katılıyorum	Kesinlikle katılıyorum	Kesinlikle katılıyorum	Kesinlikle katılıyorum	Kesinlikle katılıyorum
2025-05-06 23:56:08	Kadın	20	Lisans	Sosyoloji 1.sinif	Konya	Evet, kullanıyorum.	Evet, kullanıyorum.	ChatGPT	Hayır, kullanmıyorum.		Hayır, kullanmıyorum.		4	Çok sık kullanırım	Hiç kullanmam	Hiç kullanmam	Hiç kullanmam	Hiç kullanmam	Hiç kullanmam	Hiç kullanmam	Hiç kullanmam	Hiç kullanmam	Hiç kullanmam	Hiç kullanmam	Hiç kullanmam	Bugün	1		Eğitim / Öğrenme	Biraz yetkinim	Orta düzeyde önemli	Katılıyorum	Kararsızım	Katılıyorum	Kesinlikle Katılıyorum	Katılıyorum	Kesinlikle Katılıyorum	Kesinlikle Katılıyorum	Kesinlikle Katılıyorum	Kesinlikle Katılıyorum	Kesinlikle Katılıyorum	Kesinlikle katılıyorum	Kesinlikle katılıyorum	Kesinlikle katılıyorum	Kararsızım	Hiç katılmıyorum	Kararsızım	Kesinlikle katılıyorum	Kesinlikle katılıyorum
2025-05-07 00:16:21	Kadın	22	Lisans	Çocuk Gelişimi - 3. sınıf	Konya	Evet, kullanıyorum.	Evet, kullanıyorum.	ChatGPT	Hayır, kullanmıyorum.		Hayır, kullanmıyorum.		4	Sık kullanırım	Hiç kullanmam	Hiç kullanmam	Hiç kullanmam	Hiç kullanmam	Hiç kullanmam	Hiç kullanmam	Hiç kullanmam	Hiç kullanmam	Hiç kullanmam	Hiç kullanmam	Hiç kullanmam	Bugün	1		Eğitim / Öğrenme, İçerik Üretimi (metin, görsel, ses), İş / Mesleki Amaçlar, Günlük İşler (takvim, e-posta, öneriler vs.), Eğlence	Yetkinim	Orta düzeyde önemli	Kesinlikle Katılıyorum	Kararsızım	Katılıyorum	Kesinlikle Katılıyorum	Kesinlikle Katılıyorum	Kesinlikle Katılıyorum	Katılıyorum	Kararsızım	Hiç katılmıyorum	Kesinlikle Katılıyorum	Katılıyorum	Kesinlikle katılıyorum	Kesinlikle katılıyorum	Kesinlikle katılıyorum	Kesinlikle katılıyorum	Kararsızım	Katılıyorum	Katılıyorum
2025-05-07 08:18:40	Kadın	21	Lisans	Kuyumculuk ve takı tasarımı 1.sınıf	Konya	Evet, kullanıyorum.	Evet, kullanıyorum.	ChatGPT	Evet, kullanıyorum.	Flux	Evet, kullanıyorum.	Elevenlabs	4	Sık kullanırım	Hiç kullanmam	Nadiren kullanırım	Nadiren kullanırım	Hiç kullanmam	Ara sıra kullanırım	Hiç kullanmam	Hiç kullanmam	Ara sıra kullanırım	Hiç kullanmam	Hiç kullanmam	Nadiren kullanırım	Son 1 hafta içinde	1		Eğitim / Öğrenme, İçerik Üretimi (metin, görsel, ses), İş / Mesleki Amaçlar	Biraz yetkinim	Orta düzeyde önemli	Hiç katılmıyorum	Katılıyorum	Katılıyorum	Katılıyorum	Kesinlikle Katılıyorum	Kesinlikle Katılıyorum	Kesinlikle Katılıyorum	Kesinlikle Katılıyorum	Katılıyorum	Katılmıyorum	Katılıyorum	Katılıyorum	Katılıyorum	Katılıyorum	Katılıyorum	Katılıyorum	Katılıyorum	Katılıyorum
2025-05-07 08:45:30	Kadın	25	Lisans	Felsefe 4. Sınıf	Konya	Evet, kullanıyorum.	Evet, kullanıyorum.	ChatGPT, Gemini	Hayır, kullanmıyorum.		Hayır, kullanmıyorum.		4	Çok sık kullanırım	Nadiren kullanırım	Hiç kullanmam	Hiç kullanmam	Hiç kullanmam	Hiç kullanmam	Hiç kullanmam	Hiç kullanmam	Hiç kullanmam	Hiç kullanmam	Hiç kullanmam	Hiç kullanmam	Bugün	1		Eğitim / Öğrenme, İçerik Üretimi (metin, görsel, ses), İş / Mesleki Amaçlar, Günlük İşler (takvim, e-posta, öneriler vs.), Eğlence	Orta düzeyde yetkinim	Orta düzeyde önemli	Kesinlikle Katılıyorum	Katılıyorum	Kesinlikle Katılıyorum	Katılıyorum	Katılıyorum	Katılıyorum	Katılıyorum	Katılıyorum	Katılıyorum	Katılıyorum	Kesinlikle katılıyorum	Kesinlikle katılıyorum	Kesinlikle katılıyorum	Kesinlikle katılıyorum	Kesinlikle katılıyorum	Kesinlikle katılıyorum	Kesinlikle katılıyorum	Kesinlikle katılıyorum
2025-05-07 10:46:56	Kadın	24	Lisans	Finans ve bankacılık 4.sınıf mezun	Konya	Hayır, kullanmıyorum.
2025-05-07 11:28:22	Kadın	26	Lisans	Grafik Tasarım Mezunu	İzmir	Evet, kullanıyorum.	Evet, kullanıyorum.	ChatGPT, Gemini, DeepSeek	Evet, kullanıyorum.	Midjourney, Dall-E, Kling	Evet, kullanıyorum.	Elevenlabs	4	Çok sık kullanırım	Çok sık kullanırım	Çok sık kullanırım	Nadiren kullanırım	Ara sıra kullanırım	Nadiren kullanırım	Çok sık kullanırım	Çok sık kullanırım		Ara sıra kullanırım	Sık kullanırım	Hiç kullanmam	Bugün	4	50 USD	İçerik Üretimi (metin, görsel, ses), İş / Mesleki Amaçlar	Orta düzeyde yetkinim	Pek önemli değil	Kesinlikle Katılıyorum	Katılıyorum	Katılıyorum	Katılıyorum	Katılıyorum	Katılıyorum	Katılıyorum	Katılıyorum	Hiç katılmıyorum	Kesinlikle Katılıyorum	Kararsızım	Katılıyorum	Katılmıyorum	Hiç katılmıyorum	Katılmıyorum	Hiç katılmıyorum	Hiç katılmıyorum	Hiç katılmıyorum
2025-05-07 16:03:27	Kadın	23	Yüksek Lisans	sosyoloji yüksek lisans-1.sınıf	Isparta	Evet, kullanıyorum.	Evet, kullanıyorum.	ChatGPT	Hayır, kullanmıyorum.		Hayır, kullanmıyorum.		5	Çok sık kullanırım	Hiç kullanmam		Hiç kullanmam	Hiç kullanmam	Hiç kullanmam	Hiç kullanmam	Hiç kullanmam	Hiç kullanmam	Hiç kullanmam	Hiç kullanmam	Hiç kullanmam	Bugün	1	0 tl	Eğitim / Öğrenme, İçerik Üretimi (metin, görsel, ses), İş / Mesleki Amaçlar, Günlük İşler (takvim, e-posta, öneriler vs.), Eğlence	Yetkinim	Vazgeçilmez	Katılmıyorum	Kesinlikle Katılıyorum	Kesinlikle Katılıyorum	Kesinlikle Katılıyorum	Kesinlikle Katılıyorum	Kesinlikle Katılıyorum	Kesinlikle Katılıyorum	Kesinlikle Katılıyorum	Kararsızım	Kararsızım	Kesinlikle katılıyorum	Kesinlikle katılıyorum	Kesinlikle katılıyorum	Kesinlikle katılıyorum	Kesinlikle katılıyorum	Kesinlikle katılıyorum	Kesinlikle katılıyorum	Kesinlikle katılıyorum
2025-05-07 21:55:22	Kadın	23	Lisans	Maliye bölümü 4.sınıf	Isparta	Evet, kullanıyorum.	Evet, kullanıyorum.	ChatGPT	Hayır, kullanmıyorum.		Hayır, kullanmıyorum.		2	Ara sıra kullanırım	Hiç kullanmam	Hiç kullanmam	Hiç kullanmam	Hiç kullanmam	Hiç kullanmam	Hiç kullanmam	Hiç kullanmam	Hiç kullanmam	Hiç kullanmam	Hiç kullanmam	Hiç kullanmam	Bugün	1	500	Eğitim / Öğrenme	Biraz yetkinim	Pek önemli değil	Katılıyorum	Katılıyorum	Kararsızım	Katılıyorum	Katılıyorum	Katılıyorum	Katılıyorum	Katılıyorum	Katılmıyorum	Katılıyorum	Katılıyorum	Katılıyorum	Katılıyorum	Katılıyorum	Katılıyorum	Katılıyorum	Katılıyorum	Katılıyorum
2025-05-07 23:44:13	Kadın	22	Lisans	Radyo, Televizyon ve Sinema - 4. Sınıf	Ankara	Evet, kullanıyorum.	Evet, kullanıyorum.	ChatGPT	Evet, kullanıyorum.	Runway ML	Evet, kullanıyorum.	Suno	3	Sık kullanırım	Nadiren kullanırım	Nadiren kullanırım	Hiç kullanmam	Hiç kullanmam	Hiç kullanmam	Nadiren kullanırım	Ara sıra kullanırım	Hiç kullanmam	Ara sıra kullanırım	Nadiren kullanırım	Sık kullanırım	Son 1 hafta içinde	1	0 TL	Eğitim / Öğrenme, İçerik Üretimi (metin, görsel, ses), İş / Mesleki Amaçlar, Eğlence	Orta düzeyde yetkinim	Orta düzeyde önemli	Katılıyorum	Kararsızım	Katılıyorum	Katılıyorum	Kararsızım	Katılıyorum	Katılıyorum	Kararsızım	Kararsızım	Katılıyorum	Katılıyorum	Katılıyorum	Katılıyorum	Kararsızım	Katılıyorum	Kararsızım	Katılıyorum	Kararsızım
2025-05-08 13:46:49	Kadın	33	Yüksek Lisans	Fizik Öğretmenliği - Mezun	Konya	Evet, kullanıyorum.	Evet, kullanıyorum.	ChatGPT, Gemini, Copilot	Hayır, kullanmıyorum.		Hayır, kullanmıyorum.		5	Çok sık kullanırım	Çok sık kullanırım			Çok sık kullanırım								Bugün	1		Eğitim / Öğrenme, İçerik Üretimi (metin, görsel, ses), İş / Mesleki Amaçlar, Günlük İşler (takvim, e-posta, öneriler vs.), Eğlence	Orta düzeyde yetkinim	Vazgeçilmez	Katılıyorum	Katılıyorum	Katılıyorum	Kesinlikle Katılıyorum	Katılıyorum	Katılıyorum	Katılıyorum	Katılıyorum	Hiç katılmıyorum	Katılıyorum	Kesinlikle katılıyorum	Kesinlikle katılıyorum	Kesinlikle katılıyorum	Katılıyorum	Kesinlikle katılıyorum	Katılıyorum	Kesinlikle katılıyorum	Kararsızım
2025-05-08 16:48:24	Erkek	23	Lisans	Radyo Sinema ve Televizyon 4. sınıf	Konya	Evet, kullanıyorum.	Evet, kullanıyorum.	ChatGPT, Gemini, Grok	Hayır, kullanmıyorum.		Hayır, kullanmıyorum.		5	Çok sık kullanırım	Ara sıra kullanırım	Hiç kullanmam	Çok sık kullanırım	Hiç kullanmam	Hiç kullanmam	Hiç kullanmam	Hiç kullanmam	Hiç kullanmam	Hiç kullanmam	Hiç kullanmam	Hiç kullanmam	Bugün	3	600	Eğitim / Öğrenme, İş / Mesleki Amaçlar	Çok yetkinim	Vazgeçilmez	Kesinlikle Katılıyorum	Katılıyorum	Kesinlikle Katılıyorum	Katılıyorum	Kararsızım	Kararsızım	Kesinlikle Katılıyorum	Kesinlikle Katılıyorum	Kesinlikle Katılıyorum	Kesinlikle Katılıyorum	Kesinlikle katılıyorum	Kesinlikle katılıyorum	Kesinlikle katılıyorum	Kesinlikle katılıyorum	Kesinlikle katılıyorum	Hiç katılmıyorum	Kesinlikle katılıyorum	Kararsızım
2025-05-08 16:50:27	Erkek	23	Lisans	Radyo Televizyon ve Sinema Bölümü - 4.Sınıf	İstanbul	Evet, kullanıyorum.	Evet, kullanıyorum.	ChatGPT	Evet, kullanıyorum.	Runway ML	Evet, kullanıyorum.	Elevenlabs	5	Çok sık kullanırım	Hiç kullanmam	Nadiren kullanırım	Nadiren kullanırım	Nadiren kullanırım	Nadiren kullanırım	Nadiren kullanırım	Nadiren kullanırım	Nadiren kullanırım	Çok sık kullanırım	Çok sık kullanırım	Çok sık kullanırım	Bugün	1	0	İçerik Üretimi (metin, görsel, ses)	Çok yetkinim	Vazgeçilmez	Kesinlikle Katılıyorum	Kesinlikle Katılıyorum	Kesinlikle Katılıyorum	Kesinlikle Katılıyorum	Kesinlikle Katılıyorum	Kesinlikle Katılıyorum	Kesinlikle Katılıyorum	Kesinlikle Katılıyorum	Katılmıyorum	Kesinlikle Katılıyorum	Kesinlikle katılıyorum	Kesinlikle katılıyorum	Kesinlikle katılıyorum	Kesinlikle katılıyorum	Kesinlikle katılıyorum	Kesinlikle katılıyorum	Kesinlikle katılıyorum	Kesinlikle katılıyorum
2025-05-08 17:28:02	Kadın	22	Lisans	Radyo Televizyon ve Sinema-4. Sınıf	Konya	Evet, kullanıyorum.	Evet, kullanıyorum.	ChatGPT, Gemini	Hayır, kullanmıyorum.		Evet, kullanıyorum.	Suno	3	Sık kullanırım	Sık kullanırım	Hiç kullanmam	Hiç kullanmam	Hiç kullanmam	Hiç kullanmam	Hiç kullanmam	Hiç kullanmam	Hiç kullanmam	Hiç kullanmam	Hiç kullanmam	Hiç kullanmam	Son 1 hafta içinde	1	100	Eğitim / Öğrenme, İçerik Üretimi (metin, görsel, ses)	Orta düzeyde yetkinim	Orta düzeyde önemli	Kararsızım	Katılmıyorum	Kararsızım	Katılıyorum	Katılıyorum	Katılıyorum	Katılıyorum	Katılmıyorum	Katılmıyorum	Kesinlikle Katılıyorum	Kesinlikle katılıyorum	Katılıyorum	Kararsızım	Kararsızım	Kesinlikle katılıyorum	Katılıyorum	Katılıyorum	Kararsızım
2025-05-08 17:34:14	Erkek	21	Lisans	Radyo Televizyon ve Sinema 4. sınıf	Konya	Evet, kullanıyorum.	Evet, kullanıyorum.	ChatGPT	Evet, kullanıyorum.	Sora,	Evet, kullanıyorum.	Elevenlabs	4	Çok sık kullanırım	Nadiren kullanırım	Nadiren kullanırım	Çok sık kullanırım	Hiç kullanmam	Hiç kullanmam	Hiç kullanmam	Hiç kullanmam	Ara sıra kullanırım	Hiç kullanmam	Ara sıra kullanırım	Hiç kullanmam	Son 1 hafta içinde	1	0tl	Eğitim / Öğrenme, İçerik Üretimi (metin, görsel, ses), Günlük İşler (takvim, e-posta, öneriler vs.)	Yetkinim	Önemli	Katılıyorum	Katılmıyorum	Katılıyorum	Katılıyorum	Katılıyorum	Kararsızım	Kararsızım	Katılmıyorum	Katılıyorum	Katılmıyorum	Katılıyorum	Katılıyorum	Katılıyorum	Katılıyorum	Katılıyorum	Katılıyorum	Katılıyorum	Katılıyorum
2025-05-08 17:35:20	Erkek	23	Lisans	Radyo Televizyon Sinema -4. Sınıf	Konya	Evet, kullanıyorum.	Evet, kullanıyorum.	ChatGPT, Copilot	Hayır, kullanmıyorum.		Evet, kullanıyorum.	Suno	3	Sık kullanırım	Hiç kullanmam	Nadiren kullanırım	Nadiren kullanırım	Ara sıra kullanırım	Hiç kullanmam	Hiç kullanmam	Hiç kullanmam	Hiç kullanmam	Hiç kullanmam	Hiç kullanmam	Hiç kullanmam	Son 1 hafta içinde	2	650 tl	Eğitim / Öğrenme, İçerik Üretimi (metin, görsel, ses), İş / Mesleki Amaçlar, Günlük İşler (takvim, e-posta, öneriler vs.), Eğlence	Orta düzeyde yetkinim	Orta düzeyde önemli	Katılıyorum	Hiç katılmıyorum	Kararsızım	Kesinlikle Katılıyorum	Katılıyorum	Katılıyorum	Katılmıyorum	Hiç katılmıyorum	Katılıyorum	Kesinlikle Katılıyorum	Katılıyorum	Kesinlikle katılıyorum	Kesinlikle katılıyorum	Kesinlikle katılıyorum	Kesinlikle katılıyorum	Kararsızım	Katılıyorum	Kararsızım
2025-05-08 21:58:08	Kadın	23	Lisans	Radyo Tv ve sinema 4. sinif	Ankara	Evet, kullanıyorum.	Evet, kullanıyorum.	ChatGPT, Gemini	Hayır, kullanmıyorum.		Hayır, kullanmıyorum.		4	Çok sık kullanırım	Sık kullanırım											Son 1 hafta içinde	1		Günlük İşler (takvim, e-posta, öneriler vs.), Eğlence	Yetkinim	Önemli	Katılıyorum	Katılıyorum	Katılıyorum	Kararsızım	Katılıyorum	Kararsızım	Katılıyorum	Kararsızım	Katılıyorum	Kararsızım	Katılıyorum	Katılıyorum	Katılıyorum	Katılıyorum	Katılıyorum	Kararsızım	Katılıyorum	Kararsızım
2025-05-09 03:13:13	Erkek	22	Lisans	Radyo Televizyon ve Sinema - 4. Sınıf	Konya	Evet, kullanıyorum.	Evet, kullanıyorum.	ChatGPT, Gemini, DeepSeek, Copilot	Hayır, kullanmıyorum.		Hayır, kullanmıyorum.		3	Sık kullanırım	Nadiren kullanırım	Nadiren kullanırım	Nadiren kullanırım	Nadiren kullanırım	Hiç kullanmam	Hiç kullanmam	Hiç kullanmam	Hiç kullanmam	Hiç kullanmam	Nadiren kullanırım	Hiç kullanmam	Son 1 hafta içinde	1		Eğitim / Öğrenme, İçerik Üretimi (metin, görsel, ses), Eğlence	Çok yetkinim	Önemli	Katılıyorum	Kararsızım	Kesinlikle Katılıyorum	Kesinlikle Katılıyorum	Katılıyorum	Katılıyorum	Katılıyorum	Katılıyorum	Hiç katılmıyorum	Kesinlikle Katılıyorum	Kesinlikle katılıyorum	Kesinlikle katılıyorum	Katılıyorum	Kesinlikle katılıyorum	Kesinlikle katılıyorum	Katılmıyorum	Kararsızım	Kararsızım
2025-05-09 12:25:41	Erkek	33	Yüksek Lisans	Astronomi	Konya	Evet, kullanıyorum.	Evet, kullanıyorum.	ChatGPT, Gemini, DeepSeek	Hayır, kullanmıyorum.		Hayır, kullanmıyorum.		4	Nadiren kullanırım	Çok sık kullanırım											Bugün	4	350 TL	Eğitim / Öğrenme, İş / Mesleki Amaçlar, Veri analizi	Orta düzeyde yetkinim	Önemli	Katılıyorum	Katılıyorum	Kesinlikle Katılıyorum	Kesinlikle Katılıyorum	Kesinlikle Katılıyorum	Katılıyorum	Kesinlikle Katılıyorum	Kesinlikle Katılıyorum	Hiç katılmıyorum	Kesinlikle Katılıyorum	Kesinlikle katılıyorum	Kesinlikle katılıyorum	Kesinlikle katılıyorum	Kesinlikle katılıyorum	Kesinlikle katılıyorum	Kesinlikle katılıyorum	Kesinlikle katılıyorum	Kesinlikle katılıyorum
2025-05-09 22:37:02	Kadın	26	Lisans	Halkla İlişkiler ve Tanıtım - Mezun	Konya	Evet, kullanıyorum.	Evet, kullanıyorum.	ChatGPT	Hayır, kullanmıyorum.		Hayır, kullanmıyorum.		3	Çok sık kullanırım	Hiç kullanmam	Hiç kullanmam	Hiç kullanmam	Hiç kullanmam	Hiç kullanmam	Hiç kullanmam	Hiç kullanmam	Hiç kullanmam	Hiç kullanmam	Hiç kullanmam	Hiç kullanmam	Bugün	1	0	İş / Mesleki Amaçlar, Günlük İşler (takvim, e-posta, öneriler vs.)	Biraz yetkinim	Orta düzeyde önemli	Katılıyorum	Kararsızım	Katılıyorum	Kararsızım	Kararsızım	Katılıyorum	Kararsızım	Kesinlikle Katılıyorum	Hiç katılmıyorum	Hiç katılmıyorum	Katılıyorum	Katılıyorum	Kararsızım	Katılıyorum	Kararsızım	Katılıyorum	Katılıyorum	Katılmıyorum
2025-05-10 10:41:02	Kadın	23	Lisans	Grafik - 4. Sınıf	Konya	Evet, kullanıyorum.	Evet, kullanıyorum.	ChatGPT, Grok, Copilot	Evet, kullanıyorum.	Ideogram	Evet, kullanıyorum.	Elevenlabs	4	Sık kullanırım	Hiç kullanmam	Hiç kullanmam	Ara sıra kullanırım	Çok sık kullanırım	Hiç kullanmam	Hiç kullanmam	Hiç kullanmam	Hiç kullanmam	Hiç kullanmam	Hiç kullanmam	Hiç kullanmam	Son 1 hafta içinde	1		Eğitim / Öğrenme, İçerik Üretimi (metin, görsel, ses), İş / Mesleki Amaçlar	Orta düzeyde yetkinim	Önemli	Kararsızım	Katılmıyorum	Kararsızım	Katılıyorum	Kararsızım	Kararsızım	Kararsızım	Katılıyorum	Katılmıyorum	Kesinlikle Katılıyorum	Kesinlikle katılıyorum	Katılıyorum	Katılmıyorum	Katılıyorum	Kesinlikle katılıyorum	Kararsızım	Katılıyorum	Kararsızım
2025-05-10 11:46:54	Erkek	21	Lisans	Dış ticaret -1.sınıf	Konya	Evet, kullanıyorum.	Evet, kullanıyorum.	ChatGPT	Evet, kullanıyorum.	Sora	Hayır, kullanmıyorum.		2	Sık kullanırım	Hiç kullanmam	Nadiren kullanırım	Ara sıra kullanırım	Hiç kullanmam	Hiç kullanmam	Hiç kullanmam	Hiç kullanmam	Hiç kullanmam	Hiç kullanmam	Hiç kullanmam	Hiç kullanmam	Bugün	1	0	Günlük İşler (takvim, e-posta, öneriler vs.)	Biraz yetkinim	Önemli	Katılıyorum	Katılıyorum	Katılıyorum	Kesinlikle Katılıyorum	Kesinlikle Katılıyorum	Kesinlikle Katılıyorum	Kesinlikle Katılıyorum	Katılıyorum	Katılıyorum	Katılıyorum	Kararsızım	Katılıyorum	Katılıyorum	Katılıyorum	Katılıyorum	Katılıyorum	Kararsızım	Katılıyorum
2025-05-10 13:30:26	Kadın	19	Lisans			Evet, kullanıyorum.	Hayır, kullanmıyorum.		Evet, kullanıyorum.	Leonardo.ai	Evet, kullanıyorum.	Elevenlabs	2	Ara sıra kullanırım												Son 1 ay içinde	3		Eğitim / Öğrenme	Biraz yetkinim	Pek önemli değil	Hiç katılmıyorum	Katılmıyorum	Katılmıyorum	Hiç katılmıyorum	Hiç katılmıyorum	Katılmıyorum	Hiç katılmıyorum	Hiç katılmıyorum	Katılmıyorum	Hiç katılmıyorum	Katılmıyorum	Hiç katılmıyorum	Katılmıyorum	Hiç katılmıyorum	Hiç katılmıyorum	Hiç katılmıyorum	Katılmıyorum	Hiç katılmıyorum
2025-05-10 15:28:58	Erkek	21	Lisans	Elektrik Elektronik Mühendisliği- 2.sınıf	Konya	Evet, kullanıyorum.	Evet, kullanıyorum.	ChatGPT, Gemini, DeepSeek, Grok, Perplexity, Copilot	Evet, kullanıyorum.	Midjourney, Dall-E, Flux, Sora	Evet, kullanıyorum.	Elevenlabs	5	Çok sık kullanırım	Çok sık kullanırım	Çok sık kullanırım	Çok sık kullanırım		Çok sık kullanırım	Çok sık kullanırım	Çok sık kullanırım	Ara sıra kullanırım				Bugün	5	1500 TL	Eğitim / Öğrenme, İçerik Üretimi (metin, görsel, ses), İş / Mesleki Amaçlar, Günlük İşler (takvim, e-posta, öneriler vs.)	Orta düzeyde yetkinim	Vazgeçilmez	Kesinlikle Katılıyorum	Katılıyorum	Katılıyorum	Katılıyorum	Katılıyorum	Katılıyorum	Katılıyorum	Katılmıyorum	Katılmıyorum	Kararsızım	Kesinlikle katılıyorum	Kesinlikle katılıyorum	Kesinlikle katılıyorum	Kesinlikle katılıyorum	Kesinlikle katılıyorum	Kesinlikle katılıyorum	Katılıyorum	Katılıyorum
2025-05-10 15:30:07	Erkek	28	Lisans	İlahiyat Fakültesi 1. Sınıf	Konya	Evet, kullanıyorum.	Evet, kullanıyorum.	ChatGPT	Hayır, kullanmıyorum.		Hayır, kullanmıyorum.		3	Ara sıra kullanırım	Hiç kullanmam	Hiç kullanmam	Hiç kullanmam	Hiç kullanmam	Hiç kullanmam	Hiç kullanmam	Hiç kullanmam	Hiç kullanmam	Hiç kullanmam	Hiç kullanmam	Hiç kullanmam	Son 1 hafta içinde	1		İçerik Üretimi (metin, görsel, ses)	Orta düzeyde yetkinim	Pek önemli değil	Katılıyorum	Katılıyorum	Katılıyorum	Katılıyorum	Katılıyorum	Katılıyorum	Katılıyorum	Katılıyorum	Katılıyorum	Katılıyorum	Katılıyorum	Katılıyorum	Katılıyorum	Katılıyorum	Katılıyorum	Katılıyorum	Katılıyorum	Katılıyorum
2025-05-10 15:34:09	Erkek	30	Lisans	Sigortacılık 4.sınıf	Konya	Hayır, kullanmıyorum.
2025-05-10 19:39:09	Erkek	25	Lisans	Halkla İlişkiler ve Reklamcılık	Konya	Evet, kullanıyorum.	Evet, kullanıyorum.	ChatGPT, Gemini	Evet, kullanıyorum.	Midjourney, Dall-E, Leonardo.ai	Evet, kullanıyorum.	Suno	2	Sık kullanırım	Nadiren kullanırım	Hiç kullanmam	Hiç kullanmam	Hiç kullanmam	Hiç kullanmam	Ara sıra kullanırım	Nadiren kullanırım	Hiç kullanmam	Hiç kullanmam	Nadiren kullanırım	Hiç kullanmam	Son 1 hafta içinde	1	0 tl	İçerik Üretimi (metin, görsel, ses), Eğlence	Orta düzeyde yetkinim	Pek önemli değil	Kesinlikle Katılıyorum	Katılmıyorum	Katılıyorum	Katılıyorum	Katılıyorum	Katılıyorum	Katılıyorum	Katılıyorum	Katılıyorum	Katılıyorum	Katılıyorum	Kararsızım	Kararsızım	Kararsızım	Kararsızım	Kararsızım	Katılıyorum	Katılmıyorum
2025-05-10 21:28:56	Kadın	23	Lisans	Psikoloji 2. Sınıf	Konya	Evet, kullanıyorum.	Evet, kullanıyorum.	ChatGPT	Hayır, kullanmıyorum.		Hayır, kullanmıyorum.		5	Çok sık kullanırım	Nadiren kullanırım	Hiç kullanmam	Hiç kullanmam	Hiç kullanmam	Hiç kullanmam	Hiç kullanmam	Hiç kullanmam	Hiç kullanmam	Hiç kullanmam	Hiç kullanmam	Hiç kullanmam	Bugün	1		Eğitim / Öğrenme	Yetkinim	Vazgeçilmez	Kararsızım	Katılmıyorum	Kesinlikle Katılıyorum	Kesinlikle Katılıyorum	Kesinlikle Katılıyorum	Kesinlikle Katılıyorum	Kararsızım	Kesinlikle Katılıyorum	Kesinlikle Katılıyorum	Kesinlikle Katılıyorum	Kesinlikle katılıyorum	Kesinlikle katılıyorum	Kesinlikle katılıyorum	Kesinlikle katılıyorum	Hiç katılmıyorum	Katılmıyorum	Kesinlikle katılıyorum	Hiç katılmıyorum
2025-05-11 00:25:06	Kadın	29	Yüksek Lisans	Radyo, Televizyon ve Sinema	Konya	Evet, kullanıyorum.	Evet, kullanıyorum.	ChatGPT, DeepSeek	Evet, kullanıyorum.	Dall-E, Leonardo.ai, Sora	Evet, kullanıyorum.	Elevenlabs, Suno	4	Sık kullanırım	Ara sıra kullanırım	Sık kullanırım	Hiç kullanmam	Sık kullanırım	Sık kullanırım	Sık kullanırım	Sık kullanırım	Ara sıra kullanırım	Ara sıra kullanırım	Nadiren kullanırım	Nadiren kullanırım	Bugün	3	0	Eğitim / Öğrenme, İçerik Üretimi (metin, görsel, ses)	Orta düzeyde yetkinim	Önemli	Katılıyorum	Katılıyorum	Katılıyorum	Katılıyorum	Kararsızım	Katılıyorum	Katılıyorum	Kararsızım	Katılmıyorum	Katılmıyorum	Katılıyorum	Katılıyorum	Kararsızım	Kararsızım	Katılıyorum	Kararsızım	Katılıyorum	Katılıyorum
2025-05-11 11:23:28	Erkek	21	Lisans	Uluslararası İlişkiler 2	Konya	Evet, kullanıyorum.	Evet, kullanıyorum.	ChatGPT	Hayır, kullanmıyorum.		Hayır, kullanmıyorum.		5	Çok sık kullanırım												Son 1 hafta içinde	5	650Tl/ay	Eğitim / Öğrenme, İçerik Üretimi (metin, görsel, ses), İş / Mesleki Amaçlar, Günlük İşler (takvim, e-posta, öneriler vs.)	Yetkinim	Önemli	Katılıyorum	Kararsızım	Kesinlikle Katılıyorum	Kesinlikle Katılıyorum	Katılıyorum	Katılıyorum	Katılıyorum	Kesinlikle Katılıyorum	Kararsızım	Kararsızım	Katılıyorum	Katılıyorum	Katılıyorum	Katılıyorum	Katılıyorum	Kararsızım	Katılıyorum	Katılıyorum
2025-05-11 13:35:05	Kadın	20	Lisans	uluslararası ilişkiler- 2. sınıf	Konya	Evet, kullanıyorum.	Evet, kullanıyorum.	ChatGPT, Grok	Hayır, kullanmıyorum.		Hayır, kullanmıyorum.		4	Sık kullanırım	Hiç kullanmam	Ara sıra kullanırım	Ara sıra kullanırım	Hiç kullanmam	Hiç kullanmam	Hiç kullanmam	Hiç kullanmam	Hiç kullanmam	Hiç kullanmam	Hiç kullanmam	Hiç kullanmam	Son 1 hafta içinde	1		Eğitim / Öğrenme, Günlük İşler (takvim, e-posta, öneriler vs.)	Biraz yetkinim	Orta düzeyde önemli	Katılıyorum	Kararsızım	Katılıyorum	Kararsızım	Katılmıyorum	Katılıyorum	Kararsızım	Kararsızım	Katılmıyorum	Katılmıyorum	Katılıyorum	Katılıyorum	Katılıyorum	Kararsızım	Kararsızım	Kararsızım	Katılıyorum	Katılıyorum
2025-05-11 15:53:54	Kadın	31	Doktora	Grafik tez dönemi	Balıkesir	Evet, kullanıyorum.	Evet, kullanıyorum.	ChatGPT	Evet, kullanıyorum.	Midjourney, Dall-E, Sora, Imagen	Hayır, kullanmıyorum.		3	Sık kullanırım	Nadiren kullanırım	Nadiren kullanırım	Hiç kullanmam	Hiç kullanmam	Hiç kullanmam	Nadiren kullanırım	Sık kullanırım	Hiç kullanmam	Hiç kullanmam	Sık kullanırım	Hiç kullanmam	Son 1 hafta içinde	2	30 usd	Eğitim / Öğrenme, İçerik Üretimi (metin, görsel, ses), İş / Mesleki Amaçlar	Orta düzeyde yetkinim	Önemli	Kararsızım	Kararsızım	Katılıyorum	Katılıyorum	Katılıyorum	Katılıyorum	Katılıyorum	Katılıyorum	Hiç katılmıyorum	Kesinlikle Katılıyorum	Katılıyorum	Katılıyorum	Katılıyorum	Katılıyorum	Kesinlikle katılıyorum	Kesinlikle katılıyorum	Katılıyorum	Kararsızım
2025-05-11 16:34:16	Kadın	25	Yüksek Lisans	Sosyal Bilgiler Öğretmenliği	Malatya	Evet, kullanıyorum.	Evet, kullanıyorum.	ChatGPT	Evet, kullanıyorum.	Dall-E, Leonardo.ai	Evet, kullanıyorum.	Suno	5	Çok sık kullanırım	Ara sıra kullanırım	Ara sıra kullanırım	Hiç kullanmam	Hiç kullanmam	Hiç kullanmam	Hiç kullanmam	Çok sık kullanırım	Hiç kullanmam	Hiç kullanmam	Hiç kullanmam	Hiç kullanmam	Bugün	1	0	Eğitim / Öğrenme, İçerik Üretimi (metin, görsel, ses), İş / Mesleki Amaçlar, Günlük İşler (takvim, e-posta, öneriler vs.), Eğlence	Çok yetkinim	Orta düzeyde önemli	Kesinlikle Katılıyorum	Kesinlikle Katılıyorum	Kesinlikle Katılıyorum	Kesinlikle Katılıyorum	Kesinlikle Katılıyorum	Kesinlikle Katılıyorum	Kesinlikle Katılıyorum	Kesinlikle Katılıyorum	Kesinlikle Katılıyorum	Kesinlikle Katılıyorum	Kesinlikle katılıyorum	Kesinlikle katılıyorum	Hiç katılmıyorum	Kesinlikle katılıyorum	Kesinlikle katılıyorum	Kararsızım	Kesinlikle katılıyorum	Kesinlikle katılıyorum
2025-05-11 17:41:55	Erkek	28	Yüksek Lisans		konya	Evet, kullanıyorum.	Evet, kullanıyorum.	ChatGPT	Hayır, kullanmıyorum.		Hayır, kullanmıyorum.		3	Çok sık kullanırım	Hiç kullanmam	Hiç kullanmam	Ara sıra kullanırım	Hiç kullanmam	Hiç kullanmam	Hiç kullanmam	Hiç kullanmam	Hiç kullanmam		Hiç kullanmam	Hiç kullanmam	Bugün	3	10 dolar	Eğitim / Öğrenme, İçerik Üretimi (metin, görsel, ses), İş / Mesleki Amaçlar, Günlük İşler (takvim, e-posta, öneriler vs.), Eğlence	Orta düzeyde yetkinim	Önemli	Katılıyorum	Katılıyorum	Katılıyorum	Katılıyorum	Katılıyorum	Katılıyorum	Katılıyorum	Katılıyorum	Katılıyorum	Katılıyorum	Katılıyorum	Katılıyorum	Katılıyorum	Katılıyorum	Katılıyorum	Katılıyorum	Katılıyorum	Katılıyorum
2025-05-11 17:59:46	Kadın	51	Lisans	Nakış öğretmenliği	Konya	Evet, kullanıyorum.	Evet, kullanıyorum.	ChatGPT, Gemini	Hayır, kullanmıyorum.		Hayır, kullanmıyorum.		4	Sık kullanırım	Sık kullanırım	Hiç kullanmam	Hiç kullanmam	Hiç kullanmam	Hiç kullanmam	Hiç kullanmam	Hiç kullanmam	Hiç kullanmam	Hiç kullanmam	Hiç kullanmam	Hiç kullanmam	Bugün	1	000	Eğitim / Öğrenme, İçerik Üretimi (metin, görsel, ses), İş / Mesleki Amaçlar, Günlük İşler (takvim, e-posta, öneriler vs.)	Orta düzeyde yetkinim	Önemli	Katılıyorum	Katılıyorum	Katılıyorum	Katılıyorum	Katılıyorum	Katılıyorum	Katılıyorum	Katılıyorum	Katılıyorum	Katılıyorum	Katılıyorum	Kesinlikle katılıyorum	Kesinlikle katılıyorum	Kesinlikle katılıyorum	Kesinlikle katılıyorum	Kesinlikle katılıyorum	Kesinlikle katılıyorum	Kesinlikle katılıyorum
2025-05-11 19:34:31	Erkek	32	Doktora	Felsefe ve Din Bilimleri doktora	Nevşehir	Evet, kullanıyorum.	Evet, kullanıyorum.	ChatGPT, Gemini	Evet, kullanıyorum.	Midjourney, Dall-E, Sora, Kling	Evet, kullanıyorum.	Elevenlabs, Suno	4	Sık kullanırım	Sık kullanırım	Nadiren kullanırım			Ara sıra kullanırım	Ara sıra kullanırım	Ara sıra kullanırım					Son 1 hafta içinde	4	20 USD	Eğitim / Öğrenme, İş / Mesleki Amaçlar, Günlük İşler (takvim, e-posta, öneriler vs.), Eğlence	Orta düzeyde yetkinim	Pek önemli değil	Kesinlikle Katılıyorum	Kesinlikle Katılıyorum	Katılıyorum	Katılıyorum	Katılıyorum	Katılıyorum	Katılıyorum	Kesinlikle Katılıyorum	Hiç katılmıyorum	Katılıyorum	Katılıyorum	Kararsızım	Kararsızım	Katılıyorum	Katılıyorum	Kararsızım	Katılıyorum	Katılıyorum
2025-05-11 19:41:49	Erkek	38	Doktora	Doktora	Konya	Evet, kullanıyorum.	Evet, kullanıyorum.	ChatGPT, DeepSeek, Copilot	Hayır, kullanmıyorum.		Hayır, kullanmıyorum.		3	Sık kullanırım		Ara sıra kullanırım		Sık kullanırım	Ara sıra kullanırım							Son 1 hafta içinde	3	40 USD	İçerik Üretimi (metin, görsel, ses)	Orta düzeyde yetkinim	Orta düzeyde önemli	Katılıyorum	Katılıyorum	Katılıyorum	Katılıyorum	Katılıyorum	Katılıyorum	Katılıyorum	Katılıyorum	Katılıyorum	Katılıyorum	Katılıyorum	Katılıyorum	Katılıyorum	Katılıyorum	Katılıyorum	Katılıyorum	Katılıyorum	Katılıyorum
2025-05-11 19:47:21	Kadın	25	Yüksek Lisans	İlahiyat fakültesi, Yüksek lisans	Konya	Evet, kullanıyorum.	Evet, kullanıyorum.	ChatGPT	Hayır, kullanmıyorum.		Hayır, kullanmıyorum.		3	Ara sıra kullanırım	Ara sıra kullanırım	Ara sıra kullanırım	Hiç kullanmam	Hiç kullanmam	Hiç kullanmam	Hiç kullanmam	Hiç kullanmam	Hiç kullanmam	Hiç kullanmam	Hiç kullanmam	Hiç kullanmam	Son 1 hafta içinde	1	Ücretsiz kullanıyorum	Eğitim / Öğrenme, İş / Mesleki Amaçlar, Günlük İşler (takvim, e-posta, öneriler vs.), Eğlence	Orta düzeyde yetkinim	Orta düzeyde önemli	Katılıyorum	Kararsızım	Kararsızım	Katılıyorum	Katılıyorum	Katılıyorum	Katılıyorum	Kesinlikle Katılıyorum	Hiç katılmıyorum	Kesinlikle Katılıyorum	Katılıyorum	Katılıyorum	Katılıyorum	Katılıyorum	Katılıyorum	Kararsızım	Katılıyorum	Kararsızım
2025-05-11 20:41:28	Kadın	18	Lisans	Uluslararası ilişkiler 1. Sınıf	Çorum	Evet, kullanıyorum.	Evet, kullanıyorum.	ChatGPT	Hayır, kullanmıyorum.		Hayır, kullanmıyorum.		2	Nadiren kullanırım	Hiç kullanmam	Hiç kullanmam	Hiç kullanmam	Hiç kullanmam	Hiç kullanmam	Hiç kullanmam	Hiç kullanmam	Hiç kullanmam	Hiç kullanmam	Hiç kullanmam	Hiç kullanmam	Son 1 hafta içinde	1	0	Eğitim / Öğrenme	Hiç yetkin hissetmiyorum	Orta düzeyde önemli	Kararsızım	Katılıyorum	Katılıyorum	Katılıyorum	Katılıyorum	Hiç katılmıyorum	Hiç katılmıyorum	Katılıyorum	Hiç katılmıyorum	Hiç katılmıyorum	Katılıyorum	Katılıyorum	Kararsızım	Katılıyorum	Katılıyorum	Kararsızım	Kararsızım	Katılıyorum
2025-05-11 23:16:29	Kadın	24	Lisans	Sosyoloji- Mezun	Konya	Evet, kullanıyorum.	Evet, kullanıyorum.	ChatGPT, Gemini, Perplexity, Notebook LM	Hayır, kullanmıyorum.		Hayır, kullanmıyorum.		3	Sık kullanırım	Ara sıra kullanırım	Hiç kullanmam	Hiç kullanmam	Hiç kullanmam	Nadiren kullanırım	Hiç kullanmam	Hiç kullanmam	Hiç kullanmam	Hiç kullanmam	Hiç kullanmam	Hiç kullanmam	Son 1 hafta içinde	1	0	İçerik Üretimi (metin, görsel, ses), İş / Mesleki Amaçlar, Günlük İşler (takvim, e-posta, öneriler vs.), Eğlence	Orta düzeyde yetkinim	Önemli	Katılıyorum	Kararsızım	Katılmıyorum	Katılıyorum	Katılıyorum	Katılıyorum	Kararsızım	Kararsızım	Katılmıyorum	Katılıyorum	Katılıyorum	Katılıyorum	Katılıyorum	Katılıyorum	Kesinlikle katılıyorum	Katılıyorum	Katılıyorum	Kararsızım
2025-05-11 23:58:00	Kadın	32	Lisans	İlahiyat mezun	Konya	Evet, kullanıyorum.	Evet, kullanıyorum.	ChatGPT, DeepSeek, Grok, Copilot, Suno	Hayır, kullanmıyorum.		Evet, kullanıyorum.	Suno	4	Sık kullanırım	Nadiren kullanırım	Nadiren kullanırım	Sık kullanırım	Ara sıra kullanırım								Bugün	1	Ödemiyorum	Eğitim / Öğrenme, İçerik Üretimi (metin, görsel, ses), İş / Mesleki Amaçlar, Günlük İşler (takvim, e-posta, öneriler vs.)	Biraz yetkinim	Orta düzeyde önemli	Katılmıyorum	Katılmıyorum	Kararsızım	Katılıyorum	Katılıyorum	Katılıyorum	Kararsızım	Kesinlikle Katılıyorum	Kararsızım	Kararsızım	Katılıyorum	Katılıyorum	Kesinlikle katılıyorum	Kesinlikle katılıyorum	Katılıyorum	Kararsızım	Katılıyorum	Kararsızım
2025-05-12 01:00:54	Kadın	26	Lisans	Hukuk	Ankara	Evet, kullanıyorum.	Evet, kullanıyorum.	ChatGPT	Hayır, kullanmıyorum.		Hayır, kullanmıyorum.		5	Çok sık kullanırım	Hiç kullanmam	Hiç kullanmam	Hiç kullanmam	Hiç kullanmam	Hiç kullanmam	Hiç kullanmam	Hiç kullanmam	Hiç kullanmam	Hiç kullanmam	Hiç kullanmam	Hiç kullanmam	Son 1 hafta içinde	1		Eğitim / Öğrenme, İçerik Üretimi (metin, görsel, ses), İş / Mesleki Amaçlar, Günlük İşler (takvim, e-posta, öneriler vs.), Eğlence	Orta düzeyde yetkinim	Önemli	Katılıyorum	Katılıyorum	Kesinlikle Katılıyorum	Kesinlikle Katılıyorum	Kesinlikle Katılıyorum	Kesinlikle Katılıyorum	Katılıyorum	Katılmıyorum	Katılmıyorum	Kesinlikle Katılıyorum	Kesinlikle katılıyorum	Kesinlikle katılıyorum	Kesinlikle katılıyorum	Kesinlikle katılıyorum	Kesinlikle katılıyorum	Kararsızım	Kesinlikle katılıyorum	Kesinlikle katılıyorum
2025-05-12 09:39:26	Erkek	37	Yüksek Lisans	Fizik bölümü yl mezun	Konya	Evet, kullanıyorum.	Evet, kullanıyorum.	ChatGPT	Hayır, kullanmıyorum.		Hayır, kullanmıyorum.		1	Nadiren kullanırım	Hiç kullanmam	Hiç kullanmam	Hiç kullanmam	Hiç kullanmam	Hiç kullanmam	Hiç kullanmam	Hiç kullanmam	Hiç kullanmam	Hiç kullanmam	Hiç kullanmam	Hiç kullanmam	Son 1 ay içinde	1		İş / Mesleki Amaçlar	Hiç yetkin hissetmiyorum	Pek önemli değil	Katılıyorum	Katılmıyorum	Katılmıyorum	Katılıyorum	Katılıyorum	Katılıyorum	Katılmıyorum	Kararsızım	Katılmıyorum	Kesinlikle Katılıyorum	Katılıyorum	Katılıyorum	Katılıyorum	Katılmıyorum	Katılıyorum	Katılıyorum	Katılıyorum	Kararsızım
2025-05-12 11:14:44	Kadın	24	Yüksek Lisans	Radyo Televizyon ve Sinema Yüksek Lisans	Yozgat	Evet, kullanıyorum.	Evet, kullanıyorum.	ChatGPT, DeepSeek, Copilot	Hayır, kullanmıyorum.		Hayır, kullanmıyorum.		3	Sık kullanırım	Hiç kullanmam	Ara sıra kullanırım	Hiç kullanmam	Sık kullanırım	Hiç kullanmam	Hiç kullanmam	Hiç kullanmam	Hiç kullanmam	Hiç kullanmam	Hiç kullanmam	Hiç kullanmam	Son 1 hafta içinde	1	0	Eğitim / Öğrenme, İçerik Üretimi (metin, görsel, ses), Eğlence	Orta düzeyde yetkinim	Önemli	Katılıyorum	Katılıyorum	Katılıyorum	Kesinlikle Katılıyorum	Kesinlikle Katılıyorum	Kesinlikle Katılıyorum	Katılıyorum	Kesinlikle Katılıyorum	Katılmıyorum	Kesinlikle Katılıyorum	Kesinlikle katılıyorum	Kesinlikle katılıyorum	Kesinlikle katılıyorum	Kesinlikle katılıyorum	Kesinlikle katılıyorum	Kesinlikle katılıyorum	Kesinlikle katılıyorum	Kesinlikle katılıyorum
2025-05-12 13:50:15	Kadın	30	Yüksek Lisans	Resim	Erzurum	Hayır, kullanmıyorum.
2025-05-13 17:25:30	Erkek	35	Yüksek Lisans		Konya	Evet, kullanıyorum.	Evet, kullanıyorum.	ChatGPT, Gemini	Hayır, kullanmıyorum.		Hayır, kullanmıyorum.		3	Ara sıra kullanırım	Ara sıra kullanırım											Son 1 hafta içinde	1	0 tl	Eğitim / Öğrenme, İş / Mesleki Amaçlar	Biraz yetkinim	Orta düzeyde önemli	Katılıyorum	Kararsızım	Katılıyorum	Kararsızım	Katılıyorum	Katılıyorum	Katılıyorum	Katılıyorum	Hiç katılmıyorum	Kesinlikle Katılıyorum	Katılıyorum	Katılıyorum	Katılıyorum	Katılıyorum	Katılıyorum	Kararsızım	Kararsızım	Katılıyorum
2025-05-13 17:25:42	Erkek	31	Lisans		Konya	Evet, kullanıyorum.	Evet, kullanıyorum.	ChatGPT	Hayır, kullanmıyorum.		Hayır, kullanmıyorum.		5	Çok sık kullanırım												Bugün	5	500TL	Eğitim / Öğrenme, İş / Mesleki Amaçlar, Günlük İşler (takvim, e-posta, öneriler vs.), Eğlence	Yetkinim	Vazgeçilmez	Kesinlikle Katılıyorum	Katılıyorum	Katılıyorum	Kesinlikle Katılıyorum	Kesinlikle Katılıyorum	Kesinlikle Katılıyorum	Katılıyorum	Kesinlikle Katılıyorum	Hiç katılmıyorum	Kesinlikle Katılıyorum	Kesinlikle katılıyorum	Kesinlikle katılıyorum	Kesinlikle katılıyorum	Kesinlikle katılıyorum	Kesinlikle katılıyorum	Kesinlikle katılıyorum	Kesinlikle katılıyorum	Kesinlikle katılıyorum
2025-05-13 20:21:14	Erkek	22	Lisans	Bilgisayar Mühendisliği - 3. sınıf	Ankara	Evet, kullanıyorum.	Evet, kullanıyorum.	ChatGPT	Evet, kullanıyorum.	Midjourney, Dall-E, Kling	Evet, kullanıyorum.	Elevenlabs	4	Çok sık kullanırım	Ara sıra kullanırım	Nadiren kullanırım	Ara sıra kullanırım	Ara sıra kullanırım	Nadiren kullanırım	Hiç kullanmam	Ara sıra kullanırım	Nadiren kullanırım	Sık kullanırım	Hiç kullanmam	Hiç kullanmam	Bugün	2	79.2 usd	İçerik Üretimi (metin, görsel, ses), Günlük İşler (takvim, e-posta, öneriler vs.), Eğlence	Yetkinim	Önemli	Katılıyorum	Kararsızım	Katılıyorum	Katılıyorum	Katılıyorum	Katılıyorum	Katılıyorum	Kesinlikle Katılıyorum	Kararsızım	Kesinlikle Katılıyorum	Kesinlikle katılıyorum	Kesinlikle katılıyorum	Kesinlikle katılıyorum	Kesinlikle katılıyorum	Kesinlikle katılıyorum	Kesinlikle katılıyorum	Kesinlikle katılıyorum	Kesinlikle katılıyorum
2025-05-13 20:52:07	Kadın	18	Lisans	Sağlık yönetimi 1. Sınıf	Edirne	Hayır, kullanmıyorum.
2025-05-13 20:54:44	Erkek	23	Lisans	Sağlık Yönetimi - 4. Sınıf	Edirne	Evet, kullanıyorum.	Evet, kullanıyorum.	ChatGPT, Gemini	Evet, kullanıyorum.	Midjourney, Sora	Evet, kullanıyorum.	Suno	3	Çok sık kullanırım	Ara sıra kullanırım	Hiç kullanmam	Hiç kullanmam	Hiç kullanmam		Çok sık kullanırım	Hiç kullanmam	Hiç kullanmam	Hiç kullanmam	Sık kullanırım	Hiç kullanmam	Son 1 hafta içinde	1	250 TL	Eğitim / Öğrenme, İçerik Üretimi (metin, görsel, ses), İş / Mesleki Amaçlar, Eğlence	Yetkinim	Önemli	Kesinlikle Katılıyorum	Kararsızım	Kesinlikle Katılıyorum	Kesinlikle Katılıyorum	Katılıyorum	Katılıyorum	Kararsızım	Kararsızım	Katılmıyorum	Kesinlikle Katılıyorum	Kesinlikle katılıyorum	Kesinlikle katılıyorum	Kesinlikle katılıyorum	Kesinlikle katılıyorum	Kesinlikle katılıyorum	Kesinlikle katılıyorum	Kesinlikle katılıyorum	Kesinlikle katılıyorum
2025-05-13 21:18:46	Kadın	37	Lisans	Grafik tasarım	Konya	Evet, kullanıyorum.	Evet, kullanıyorum.	ChatGPT, DeepSeek, Perplexity, Copilot	Evet, kullanıyorum.	Midjourney, Leonardo.ai, Kling	Evet, kullanıyorum.	Elevenlabs	2	Nadiren kullanırım	Ara sıra kullanırım	Sık kullanırım	Çok sık kullanırım	Sık kullanırım	Ara sıra kullanırım	Nadiren kullanırım	Ara sıra kullanırım	Ara sıra kullanırım	Nadiren kullanırım	Nadiren kullanırım	Ara sıra kullanırım	Son 1 hafta içinde	5	500	Eğitim / Öğrenme, İçerik Üretimi (metin, görsel, ses), İş / Mesleki Amaçlar, Yemek tarifleri	Orta düzeyde yetkinim	Vazgeçilmez	Kesinlikle Katılıyorum	Katılıyorum	Kesinlikle Katılıyorum	Kesinlikle Katılıyorum	Katılıyorum	Katılıyorum	Kesinlikle Katılıyorum	Kesinlikle Katılıyorum	Hiç katılmıyorum	Kesinlikle Katılıyorum	Kesinlikle katılıyorum	Kesinlikle katılıyorum	Kesinlikle katılıyorum	Kesinlikle katılıyorum	Kesinlikle katılıyorum	Kesinlikle katılıyorum	Kesinlikle katılıyorum	Katılıyorum
2025-05-13 21:25:49	Erkek	21	Lisans	İlahiyat 2.sinif	Çanakkale	Hayır, kullanmıyorum.
2025-05-13 21:38:26	Kadın	23	Lisans	Psikoloji - 3. sınıf	İstanbul	Evet, kullanıyorum.	Evet, kullanıyorum.	ChatGPT	Hayır, kullanmıyorum.		Hayır, kullanmıyorum.		5	Çok sık kullanırım	Hiç kullanmam	Hiç kullanmam	Hiç kullanmam	Nadiren kullanırım	Hiç kullanmam	Hiç kullanmam	Hiç kullanmam	Hiç kullanmam	Hiç kullanmam	Hiç kullanmam	Hiç kullanmam	Bugün	5	20 USD	Eğitim / Öğrenme, İçerik Üretimi (metin, görsel, ses)	Orta düzeyde yetkinim	Vazgeçilmez	Kesinlikle Katılıyorum	Katılmıyorum	Katılıyorum	Kesinlikle Katılıyorum	Katılıyorum	Kesinlikle Katılıyorum	Kesinlikle Katılıyorum	Kesinlikle Katılıyorum	Katılmıyorum	Kararsızım	Kesinlikle katılıyorum	Kesinlikle katılıyorum	Kesinlikle katılıyorum	Kesinlikle katılıyorum	Kesinlikle katılıyorum	Kararsızım	Kesinlikle katılıyorum	Kesinlikle katılıyorum
2025-05-13 22:46:01	Erkek	21	Lisans	Harita ve kadastro - 2. Sınıf	Edirne	Evet, kullanıyorum.	Evet, kullanıyorum.	ChatGPT	Evet, kullanıyorum.	Midjourney	Evet, kullanıyorum.	MMAudio	3	Sık kullanırım												Son 1 hafta içinde	1	250 tl	Eğitim / Öğrenme	Biraz yetkinim	Pek önemli değil	Katılıyorum	Kararsızım	Katılıyorum	Kararsızım	Katılıyorum	Katılıyorum	Kararsızım	Katılıyorum	Kararsızım	Katılıyorum	Kararsızım	Kararsızım	Kararsızım	Kararsızım	Kararsızım	Kararsızım	Kararsızım	Kararsızım
2025-05-13 23:51:49	Kadın	23	Lisans	Biyomedikal Cihaz Teknolojisi-Mezun	Tekirdağ	Evet, kullanıyorum.	Evet, kullanıyorum.	ChatGPT, DeepSeek	Evet, kullanıyorum.	Midjourney	Hayır, kullanmıyorum.		4	Çok sık kullanırım	Nadiren kullanırım	Ara sıra kullanırım	Hiç kullanmam	Hiç kullanmam	Hiç kullanmam	Ara sıra kullanırım	Hiç kullanmam	Hiç kullanmam	Hiç kullanmam	Hiç kullanmam	Hiç kullanmam	Son 1 hafta içinde	1		Eğitim / Öğrenme, İçerik Üretimi (metin, görsel, ses), İş / Mesleki Amaçlar, Günlük İşler (takvim, e-posta, öneriler vs.), Eğlence	Orta düzeyde yetkinim	Orta düzeyde önemli	Katılıyorum	Katılıyorum	Katılıyorum	Katılıyorum	Katılıyorum	Kesinlikle Katılıyorum	Kesinlikle Katılıyorum	Katılıyorum	Kararsızım	Kesinlikle Katılıyorum	Katılıyorum	Katılıyorum	Katılıyorum	Katılıyorum	Katılıyorum	Kararsızım	Kararsızım	Kararsızım
2025-05-14 09:44:58	Erkek	22	Lisans	Endüstri Mühendisliği 4. Sınıf	Tekirdağ	Evet, kullanıyorum.	Evet, kullanıyorum.	ChatGPT, Gemini	Hayır, kullanmıyorum.		Evet, kullanıyorum.	Suno	5	Çok sık kullanırım	Çok sık kullanırım	Hiç kullanmam	Hiç kullanmam	Ara sıra kullanırım	Hiç kullanmam	Hiç kullanmam	Hiç kullanmam	Hiç kullanmam	Hiç kullanmam	Hiç kullanmam	Hiç kullanmam	Son 1 hafta içinde	1	0	Eğitim / Öğrenme, Günlük İşler (takvim, e-posta, öneriler vs.)	Yetkinim	Orta düzeyde önemli	Katılıyorum	Kararsızım	Kesinlikle Katılıyorum	Kesinlikle Katılıyorum	Kesinlikle Katılıyorum	Katılıyorum	Katılıyorum	Kararsızım	Kararsızım	Kararsızım	Katılıyorum	Kesinlikle katılıyorum	Kesinlikle katılıyorum	Kesinlikle katılıyorum	Katılıyorum	Katılıyorum	Kesinlikle katılıyorum	Kesinlikle katılıyorum
2025-05-14 16:41:10	Kadın	21	Lisans	Halkla ilişkiler ve tanıtım 3. Sınıf	Konya	Evet, kullanıyorum.	Evet, kullanıyorum.	ChatGPT	Evet, kullanıyorum.	Kling	Hayır, kullanmıyorum.		5	Çok sık kullanırım												Bugün	1	0	Eğitim / Öğrenme, İçerik Üretimi (metin, görsel, ses), İş / Mesleki Amaçlar, Günlük İşler (takvim, e-posta, öneriler vs.), Eğlence,	Hiç yetkin hissetmiyorum	Orta düzeyde önemli	Katılıyorum	Katılıyorum	Kararsızım	Kararsızım	Katılmıyorum	Kararsızım	Kararsızım	Kararsızım	Kararsızım	Kararsızım	Kesinlikle katılıyorum	Kesinlikle katılıyorum	Katılıyorum	Kararsızım	Hiç katılmıyorum	Katılmıyorum	Katılmıyorum	Hiç katılmıyorum
2025-05-14 16:41:29	Kadın	19	Lisans	İngilizc Dili ve Edebiyatı - Hazırlık Sınıfı	Gaziantep	Evet, kullanıyorum.	Evet, kullanıyorum.	ChatGPT, Gemini, Copilot	Evet, kullanıyorum.	Runway ML, Sora, Kling	Evet, kullanıyorum.	Elevenlabs	3	Sık kullanırım	Ara sıra kullanırım	Ara sıra kullanırım	Ara sıra kullanırım	Ara sıra kullanırım	Nadiren kullanırım	Nadiren kullanırım	Hiç kullanmam	Nadiren kullanırım	Nadiren kullanırım		Ara sıra kullanırım	Son 1 hafta içinde	1		Eğitim / Öğrenme, İçerik Üretimi (metin, görsel, ses), İş / Mesleki Amaçlar, Günlük İşler (takvim, e-posta, öneriler vs.)	Orta düzeyde yetkinim	Orta düzeyde önemli	Katılıyorum	Katılmıyorum	Kararsızım	Katılıyorum	Katılıyorum	Katılıyorum	Katılıyorum	Kararsızım	Katılmıyorum	Katılıyorum	Katılıyorum	Katılıyorum	Kararsızım	Katılıyorum	Katılıyorum	Katılmıyorum	Katılıyorum	Katılıyorum
2025-05-14 17:51:34	Kadın	18	Lisans	Radyo Televizyon ve Sinema- 1. sınıf	Konya	Evet, kullanıyorum.	Evet, kullanıyorum.	ChatGPT, Gemini	Hayır, kullanmıyorum.		Hayır, kullanmıyorum.		2	Nadiren kullanırım	Nadiren kullanırım	Hiç kullanmam	Hiç kullanmam	Hiç kullanmam	Hiç kullanmam	Hiç kullanmam	Hiç kullanmam	Hiç kullanmam	Hiç kullanmam	Hiç kullanmam	Hiç kullanmam	Daha uzun süre önce	1		Eğitim / Öğrenme, İçerik Üretimi (metin, görsel, ses), İş / Mesleki Amaçlar, Günlük İşler (takvim, e-posta, öneriler vs.),	Orta düzeyde yetkinim	Hiç önemli değil	Katılıyorum	Katılıyorum	Katılıyorum	Katılıyorum	Kararsızım	Katılıyorum	Kararsızım	Kesinlikle Katılıyorum	Hiç katılmıyorum	Kesinlikle Katılıyorum	Kararsızım	Katılıyorum	Katılıyorum	Kararsızım	Katılıyorum	Kararsızım	Katılıyorum	Katılmıyorum
2025-05-14 19:37:17	Erkek	21	Lisans	Radyo televizyon ve sinema 2.sınır	Konya	Evet, kullanıyorum.	Evet, kullanıyorum.	ChatGPT	Hayır, kullanmıyorum.		Hayır, kullanmıyorum.		2	Ara sıra kullanırım	Nadiren kullanırım	Hiç kullanmam	Hiç kullanmam	Hiç kullanmam	Hiç kullanmam	Hiç kullanmam	Hiç kullanmam	Hiç kullanmam	Hiç kullanmam	Hiç kullanmam	Hiç kullanmam	Son 1 hafta içinde	1	00	İçerik Üretimi (metin, görsel, ses)	Yetkinim	Orta düzeyde önemli	Kararsızım	Kararsızım	Kararsızım	Kararsızım	Kesinlikle Katılıyorum	Katılıyorum	Katılıyorum	Katılıyorum	Katılıyorum	Katılıyorum	Katılmıyorum	Katılıyorum	Katılıyorum	Kararsızım	Katılıyorum	Katılmıyorum	Kararsızım	Kararsızım
2025-05-15 10:41:51	Kadın	19	Lisans	İngilizce mütercim ve tercumanlık hazırlık	Konya	Evet, kullanıyorum.	Evet, kullanıyorum.	ChatGPT, DeepSeek	Evet, kullanıyorum.	Midjourney, Flux, Leonardo.ai, Runway ML	Evet, kullanıyorum.	Suno, MMAudio	5	Çok sık kullanırım		Ara sıra kullanırım	Nadiren kullanırım	Nadiren kullanırım			Ara sıra kullanırım	Ara sıra kullanırım		Nadiren kullanırım	Nadiren kullanırım	Son 1 hafta içinde	1	0	Eğitim / Öğrenme, İçerik Üretimi (metin, görsel, ses), Eğlence	Orta düzeyde yetkinim	Önemli	Katılmıyorum	Katılmıyorum	Katılmıyorum	Katılmıyorum	Katılmıyorum	Katılmıyorum	Katılmıyorum	Katılmıyorum	Katılmıyorum	Katılmıyorum	Katılmıyorum	Katılmıyorum	Katılmıyorum	Katılmıyorum	Katılmıyorum	Katılmıyorum	Katılmıyorum	Katılmıyorum
2025-05-15 12:44:52	Erkek	21	Lisans	Gazetecilik - 2.sınıt	Konya	Evet, kullanıyorum.	Evet, kullanıyorum.	ChatGPT	Hayır, kullanmıyorum.		Hayır, kullanmıyorum.		2	Nadiren kullanırım												Son 1 hafta içinde	1		Eğitim / Öğrenme, Eğlence	Hiç yetkin hissetmiyorum	Hiç önemli değil	Katılmıyorum	Hiç katılmıyorum	Hiç katılmıyorum	Hiç katılmıyorum	Hiç katılmıyorum	Hiç katılmıyorum	Hiç katılmıyorum	Hiç katılmıyorum	Hiç katılmıyorum	Hiç katılmıyorum	Katılmıyorum	Katılmıyorum	Katılmıyorum	Katılmıyorum	Katılmıyorum	Katılmıyorum	Katılmıyorum	Katılmıyorum
2025-05-15 12:49:56	Kadın	19	Lisans	Radyo, Televizyon ve Sinema - 1. sınıf	İstanbul	Evet, kullanıyorum.	Evet, kullanıyorum.	ChatGPT, Yazeka	Hayır, kullanmıyorum.		Hayır, kullanmıyorum.		4	Çok sık kullanırım	Hiç kullanmam	Hiç kullanmam	Nadiren kullanırım	Hiç kullanmam	Hiç kullanmam	Hiç kullanmam	Hiç kullanmam	Hiç kullanmam	Hiç kullanmam	Hiç kullanmam	Hiç kullanmam	Bugün	1	Ücret ödemeden kullanıyorum.	Eğitim / Öğrenme, İçerik Üretimi (metin, görsel, ses), İş / Mesleki Amaçlar, Günlük İşler (takvim, e-posta, öneriler vs.), Öğünlerimi düzenlemek ya da günlük kalorimi hesaplamak için.	Yetkinim	Önemli	Katılıyorum	Katılıyorum	Katılıyorum	Kesinlikle Katılıyorum	Kararsızım	Kesinlikle Katılıyorum	Kesinlikle Katılıyorum	Kesinlikle Katılıyorum	Kararsızım	Katılıyorum	Kesinlikle katılıyorum	Kesinlikle katılıyorum	Kesinlikle katılıyorum	Katılıyorum	Katılıyorum	Katılmıyorum	Kesinlikle katılıyorum	Kesinlikle katılıyorum
2025-05-15 12:50:16	Kadın	19	Lisans	Radyo televizyon ve sinema 1. Sınıf	Konya	Evet, kullanıyorum.	Evet, kullanıyorum.	ChatGPT	Hayır, kullanmıyorum.		Hayır, kullanmıyorum.		2	Sık kullanırım	Hiç kullanmam	Hiç kullanmam	Hiç kullanmam	Hiç kullanmam	Hiç kullanmam	Hiç kullanmam	Hiç kullanmam	Hiç kullanmam	Hiç kullanmam	Hiç kullanmam	Hiç kullanmam	Son 1 hafta içinde	1	0	Eğitim / Öğrenme, İçerik Üretimi (metin, görsel, ses)	Orta düzeyde yetkinim	Pek önemli değil	Katılmıyorum	Hiç katılmıyorum	Katılıyorum	Kesinlikle Katılıyorum	Hiç katılmıyorum	Katılmıyorum	Hiç katılmıyorum	Hiç katılmıyorum	Katılmıyorum	Katılmıyorum	Katılıyorum	Katılıyorum	Katılmıyorum	Kararsızım	Katılıyorum	Katılıyorum	Katılıyorum	Kararsızım
2025-05-15 21:58:33	Kadın	33	Yüksek Lisans	Astronomi ve Uzay Bilimleri	Konya	Evet, kullanıyorum.	Evet, kullanıyorum.	ChatGPT, Grok	Evet, kullanıyorum.	Midjourney, Flux	Hayır, kullanmıyorum.		5	Çok sık kullanırım								Ara sıra kullanırım				Bugün	1		Eğitim / Öğrenme, İş / Mesleki Amaçlar, Günlük İşler (takvim, e-posta, öneriler vs.), Eğlence	Orta düzeyde yetkinim	Önemli	Katılıyorum	Katılıyorum	Katılıyorum	Kesinlikle Katılıyorum	Kesinlikle Katılıyorum	Katılıyorum	Katılıyorum	Kararsızım	Katılmıyorum	Kararsızım	Kesinlikle katılıyorum	Kesinlikle katılıyorum	Kesinlikle katılıyorum	Kesinlikle katılıyorum	Kesinlikle katılıyorum	Katılıyorum	Katılıyorum	Kesinlikle katılıyorum
2025-05-16 13:32:14	Erkek	27	Doktora		Konya	Evet, kullanıyorum.	Evet, kullanıyorum.	DeepSeek	Evet, kullanıyorum.	StableDiffusion	Evet, kullanıyorum.	Suno	4	Sık kullanırım	Nadiren kullanırım	Çok sık kullanırım	Hiç kullanmam	Sık kullanırım	Hiç kullanmam	Hiç kullanmam	Hiç kullanmam	Hiç kullanmam	Hiç kullanmam	Sık kullanırım	Ara sıra kullanırım	Bugün	1		Eğitim / Öğrenme, İçerik Üretimi (metin, görsel, ses), İş / Mesleki Amaçlar, Günlük İşler (takvim, e-posta, öneriler vs.)	Orta düzeyde yetkinim	Orta düzeyde önemli	Kararsızım	Katılıyorum	Katılıyorum	Kesinlikle Katılıyorum	Kararsızım	Katılıyorum	Katılıyorum	Kararsızım	Katılıyorum	Kararsızım	Katılıyorum	Katılıyorum	Katılıyorum	Katılmıyorum	Katılıyorum	Kesinlikle katılıyorum	Kesinlikle katılıyorum	Kararsızım
2025-05-16 13:36:56	Erkek	22	Lisans	Rtv 2.sınıf	Konya	Evet, kullanıyorum.	Evet, kullanıyorum.	ChatGPT	Hayır, kullanmıyorum.		Hayır, kullanmıyorum.		2	Ara sıra kullanırım	Hiç kullanmam	Hiç kullanmam	Hiç kullanmam	Hiç kullanmam	Hiç kullanmam	Hiç kullanmam	Hiç kullanmam	Hiç kullanmam	Hiç kullanmam	Hiç kullanmam	Hiç kullanmam	Son 1 hafta içinde	1	0 tl	Eğitim / Öğrenme	Biraz yetkinim	Pek önemli değil	Katılmıyorum	Katılmıyorum	Hiç katılmıyorum	Katılmıyorum	Katılmıyorum	Katılmıyorum	Katılmıyorum	Hiç katılmıyorum	Hiç katılmıyorum	Katılmıyorum	Katılıyorum	Katılıyorum	Katılıyorum	Kesinlikle katılıyorum	Katılıyorum	Kararsızım	Katılıyorum	Kesinlikle katılıyorum
2025-05-16 13:45:52	Erkek	25	Lisans	Radyo televizyon ve sinema	Kırıkkale	Hayır, kullanmıyorum.
2025-05-16 13:49:58	Erkek	21	Lisans	Radyo, televizyon ve sinema 2. Sınıf	Ankara	Evet, kullanıyorum.	Evet, kullanıyorum.	ChatGPT, Gemini, DeepSeek, Grok, Copilot	Evet, kullanıyorum.	Midjourney, Dall-E, Runway ML, Sora	Evet, kullanıyorum.	Elevenlabs, Suno	3	Çok sık kullanırım	Nadiren kullanırım	Ara sıra kullanırım	Ara sıra kullanırım	Sık kullanırım		Nadiren kullanırım	Nadiren kullanırım			Sık kullanırım		Bugün	3	220 TL İtemsatış :)	Eğitim / Öğrenme, İçerik Üretimi (metin, görsel, ses), İş / Mesleki Amaçlar, Günlük İşler (takvim, e-posta, öneriler vs.), Eğlence	Orta düzeyde yetkinim	Önemli	Katılıyorum	Katılıyorum	Katılıyorum	Kesinlikle Katılıyorum	Katılıyorum	Katılıyorum	Katılıyorum	Katılıyorum	Katılıyorum	Katılıyorum	Katılıyorum	Kesinlikle katılıyorum	Kesinlikle katılıyorum	Kesinlikle katılıyorum	Katılıyorum	Kesinlikle katılıyorum	Kesinlikle katılıyorum	Kararsızım
2025-05-16 13:50:51	Erkek	20	Lisans	Radyo televizyon ve sinema 2.sınıf	Konya	Evet, kullanıyorum.	Evet, kullanıyorum.	ChatGPT	Hayır, kullanmıyorum.		Hayır, kullanmıyorum.		3	Sık kullanırım	Nadiren kullanırım	Nadiren kullanırım	Nadiren kullanırım	Ara sıra kullanırım	Hiç kullanmam	Hiç kullanmam	Hiç kullanmam	Hiç kullanmam	Hiç kullanmam	Ara sıra kullanırım	Hiç kullanmam	Son 1 hafta içinde	3	780 TL	İçerik Üretimi (metin, görsel, ses), İş / Mesleki Amaçlar	Orta düzeyde yetkinim	Önemli	Katılıyorum	Kararsızım	Kararsızım	Katılıyorum	Katılıyorum	Katılıyorum	Katılıyorum	Katılıyorum	Katılmıyorum	Katılıyorum	Katılıyorum	Kesinlikle katılıyorum	Katılıyorum	Kararsızım	Kesinlikle katılıyorum	Kararsızım	Katılıyorum	Kararsızım
2025-05-16 13:51:07	Kadın	20	Lisans	Radyo televizyon ve sinema -2.sınıf	Konya	Evet, kullanıyorum.	Evet, kullanıyorum.	ChatGPT, Gemini, Copilot	Evet, kullanıyorum.	Leonardo.ai,	Hayır, kullanmıyorum.		3	Sık kullanırım	Nadiren kullanırım	Hiç kullanmam	Hiç kullanmam	Sık kullanırım	Hiç kullanmam	Hiç kullanmam	Hiç kullanmam	Hiç kullanmam	Hiç kullanmam	Hiç kullanmam	Hiç kullanmam	Son 1 hafta içinde	3		Eğitim / Öğrenme, İçerik Üretimi (metin, görsel, ses), İş / Mesleki Amaçlar, Günlük İşler (takvim, e-posta, öneriler vs.), Eğlence	Orta düzeyde yetkinim	Orta düzeyde önemli	Kesinlikle Katılıyorum	Katılıyorum	Kesinlikle Katılıyorum	Kararsızım	Kesinlikle Katılıyorum	Katılıyorum	Katılıyorum	Katılıyorum	Katılıyorum	Katılıyorum	Katılıyorum	Katılıyorum	Katılıyorum	Katılıyorum	Katılıyorum	Kararsızım	Katılıyorum	Katılıyorum
2025-05-16 13:51:13	Kadın	26	Lisans	Radyo televizyon sinema - 4. sınıf	Ankara	Evet, kullanıyorum.	Evet, kullanıyorum.	ChatGPT, Gemini, DeepSeek	Evet, kullanıyorum.	Dall-E, Kling, Hailuo.ai	Evet, kullanıyorum.	Suno	5	Çok sık kullanırım	Sık kullanırım	Sık kullanırım	Hiç kullanmam	Hiç kullanmam	Nadiren kullanırım	Hiç kullanmam	Ara sıra kullanırım	Hiç kullanmam	Sık kullanırım	Ara sıra kullanırım	Hiç kullanmam	Bugün	2	350 Tl	Eğitim / Öğrenme, İçerik Üretimi (metin, görsel, ses)	Orta düzeyde yetkinim	Orta düzeyde önemli	Katılıyorum	Kararsızım	Katılıyorum	Katılıyorum	Kararsızım	Kararsızım	Katılıyorum	Katılıyorum	Katılıyorum	Katılıyorum	Katılıyorum	Katılıyorum	Katılıyorum	Kararsızım	Kararsızım	Katılıyorum	Kesinlikle katılıyorum	Kesinlikle katılıyorum
2025-05-16 13:52:16	Erkek	30	Lisans	4	Ankara	Evet, kullanıyorum.	Evet, kullanıyorum.	ChatGPT, Gemini, DeepSeek, Copilot,	Evet, kullanıyorum.	Midjourney, Dall-E, Leonardo.ai, Sora, Kling	Evet, kullanıyorum.	Elevenlabs, Suno	5	Çok sık kullanırım	Ara sıra kullanırım	Ara sıra kullanırım	Hiç kullanmam	Ara sıra kullanırım	Hiç kullanmam	Nadiren kullanırım	Ara sıra kullanırım	Ara sıra kullanırım	Sık kullanırım	Ara sıra kullanırım	Hiç kullanmam	Bugün	3	500tl	İçerik Üretimi (metin, görsel, ses), Eğlence	Orta düzeyde yetkinim	Önemli	Katılıyorum	Katılıyorum	Kesinlikle Katılıyorum	Kesinlikle Katılıyorum	Katılıyorum	Kesinlikle Katılıyorum	Kesinlikle Katılıyorum	Kesinlikle Katılıyorum	Kesinlikle Katılıyorum	Kesinlikle Katılıyorum	Kesinlikle katılıyorum	Kesinlikle katılıyorum	Kesinlikle katılıyorum	Kesinlikle katılıyorum	Kesinlikle katılıyorum	Kesinlikle katılıyorum	Kesinlikle katılıyorum	Kesinlikle katılıyorum
2025-05-16 13:52:24	Kadın	20	Lisans	radyo televizyon sinema 2. sinid	konya	Evet, kullanıyorum.	Evet, kullanıyorum.	ChatGPT	Evet, kullanıyorum.	Runway ML, Kling	Evet, kullanıyorum.	Elevenlabs	5	Çok sık kullanırım	Hiç kullanmam	Hiç kullanmam	Hiç kullanmam	Hiç kullanmam	Hiç kullanmam	Hiç kullanmam	Hiç kullanmam	Hiç kullanmam	Ara sıra kullanırım	Ara sıra kullanırım	Ara sıra kullanırım	Son 1 hafta içinde	2	20usd	İçerik Üretimi (metin, görsel, ses), İş / Mesleki Amaçlar, Eğlence	Biraz yetkinim	Önemli	Kesinlikle Katılıyorum	Katılmıyorum	Kesinlikle Katılıyorum	Kesinlikle Katılıyorum	Kesinlikle Katılıyorum	Kesinlikle Katılıyorum	Kesinlikle Katılıyorum	Kesinlikle Katılıyorum	Hiç katılmıyorum	Kesinlikle Katılıyorum	Katılıyorum	Katılıyorum	Katılıyorum	Kararsızım	Kesinlikle katılıyorum	Kesinlikle katılıyorum	Kesinlikle katılıyorum	Kararsızım
2025-05-16 13:52:46	Erkek	22	Lisans	Rts 2	adana	Evet, kullanıyorum.	Evet, kullanıyorum.	ChatGPT	Hayır, kullanmıyorum.		Hayır, kullanmıyorum.		2	Sık kullanırım	Ara sıra kullanırım	Hiç kullanmam	Hiç kullanmam	Hiç kullanmam	Hiç kullanmam	Hiç kullanmam	Hiç kullanmam	Hiç kullanmam	Hiç kullanmam	Hiç kullanmam	Hiç kullanmam	Son 1 ay içinde	1		Eğitim / Öğrenme	Orta düzeyde yetkinim	Orta düzeyde önemli	Katılıyorum	Katılıyorum	Katılıyorum	Katılıyorum	Katılıyorum	Katılıyorum	Katılıyorum	Katılıyorum	Katılıyorum	Katılıyorum	Hiç katılmıyorum	Hiç katılmıyorum	Hiç katılmıyorum	Hiç katılmıyorum	Hiç katılmıyorum	Hiç katılmıyorum	Hiç katılmıyorum	Hiç katılmıyorum
2025-05-16 13:52:52	Kadın	25	Yüksek Lisans	Radyo tv ve sinema 1. sınıf	Ankara	Evet, kullanıyorum.	Evet, kullanıyorum.	ChatGPT, DeepSeek	Hayır, kullanmıyorum.		Hayır, kullanmıyorum.		4	Çok sık kullanırım	Hiç kullanmam	Ara sıra kullanırım	Hiç kullanmam	Hiç kullanmam	Hiç kullanmam	Hiç kullanmam	Hiç kullanmam	Hiç kullanmam	Hiç kullanmam		Hiç kullanmam	Son 1 hafta içinde	3	500 tl	Eğitim / Öğrenme, İçerik Üretimi (metin, görsel, ses), İş / Mesleki Amaçlar	Biraz yetkinim	Orta düzeyde önemli	Katılıyorum	Katılmıyorum	Katılıyorum	Katılıyorum	Kararsızım	Katılıyorum	Katılıyorum	Katılmıyorum	Katılmıyorum	Katılmıyorum	Katılıyorum	Katılıyorum	Katılıyorum	Katılıyorum	Katılıyorum	Katılıyorum	Katılıyorum	Katılmıyorum
2025-05-16 13:53:20	Erkek	20	Lisans	Radyo Televizyon Ve Sinema 2.Sınıf	Ankara	Evet, kullanıyorum.	Evet, kullanıyorum.	ChatGPT, Grok	Hayır, kullanmıyorum.		Hayır, kullanmıyorum.		3	Sık kullanırım	Hiç kullanmam	Hiç kullanmam	Sık kullanırım	Hiç kullanmam	Hiç kullanmam	Hiç kullanmam	Hiç kullanmam	Hiç kullanmam	Hiç kullanmam	Hiç kullanmam	Hiç kullanmam	Son 1 hafta içinde	1	0 Tl	Eğitim / Öğrenme, Günlük İşler (takvim, e-posta, öneriler vs.), Eğlence	Yetkinim	Orta düzeyde önemli	Kesinlikle Katılıyorum	Kesinlikle Katılıyorum	Katılıyorum	Kesinlikle Katılıyorum	Kesinlikle Katılıyorum	Kesinlikle Katılıyorum	Kesinlikle Katılıyorum	Kesinlikle Katılıyorum	Hiç katılmıyorum	Kesinlikle Katılıyorum	Kesinlikle katılıyorum	Kesinlikle katılıyorum	Kesinlikle katılıyorum	Kesinlikle katılıyorum	Kesinlikle katılıyorum	Kesinlikle katılıyorum	Kesinlikle katılıyorum	Kesinlikle katılıyorum
2025-05-16 13:55:32	Erkek	26	Lisans	Radyo televizyon ve sinema 1.sınıf	Konya	Evet, kullanıyorum.	Evet, kullanıyorum.	ChatGPT, Gemini, DeepSeek, Copilot	Hayır, kullanmıyorum.		Hayır, kullanmıyorum.		3	Ara sıra kullanırım	Nadiren kullanırım	Ara sıra kullanırım	Hiç kullanmam	Ara sıra kullanırım	Hiç kullanmam	Hiç kullanmam	Hiç kullanmam	Hiç kullanmam	Hiç kullanmam	Hiç kullanmam	Hiç kullanmam	Son 1 ay içinde	3	200 tl	Eğitim / Öğrenme	Orta düzeyde yetkinim	Orta düzeyde önemli	Kesinlikle Katılıyorum	Katılıyorum	Kararsızım	Kararsızım	Kararsızım	Kararsızım	Kararsızım	Kararsızım	Kararsızım	Katılıyorum	Kararsızım	Katılıyorum	Kararsızım	Kararsızım	Hiç katılmıyorum	Hiç katılmıyorum	Kararsızım	Kararsızım
2025-05-16 14:03:29	Kadın	22	Lisans	Radyo,Sinema Tv 3. Sınıf	Konya	Evet, kullanıyorum.	Evet, kullanıyorum.	ChatGPT	Hayır, kullanmıyorum.		Hayır, kullanmıyorum.		4	Çok sık kullanırım	Ara sıra kullanırım	Hiç kullanmam	Hiç kullanmam	Hiç kullanmam	Hiç kullanmam	Hiç kullanmam	Hiç kullanmam	Hiç kullanmam	Hiç kullanmam	Hiç kullanmam	Hiç kullanmam	Bugün	1	0 tl	Eğitim / Öğrenme	Yetkinim	Önemli	Katılıyorum	Kararsızım	Katılıyorum	Kesinlikle Katılıyorum	Katılıyorum	Katılıyorum	Kararsızım	Kararsızım	Kararsızım	Kararsızım	Katılıyorum	Katılıyorum	Katılıyorum	Katılıyorum	Kesinlikle katılıyorum	Kararsızım	Katılıyorum	Kararsızım
2025-05-16 14:05:03	Kadın	20	Lisans	Radyo televizyon ve sinema - 2. Sınıf	Konya	Evet, kullanıyorum.	Evet, kullanıyorum.	ChatGPT	Hayır, kullanmıyorum.		Hayır, kullanmıyorum.		1	Ara sıra kullanırım	Hiç kullanmam	Hiç kullanmam	Hiç kullanmam	Hiç kullanmam	Hiç kullanmam	Hiç kullanmam	Hiç kullanmam	Hiç kullanmam	Hiç kullanmam	Hiç kullanmam	Hiç kullanmam	Son 1 hafta içinde	1	0 TL	İçerik Üretimi (metin, görsel, ses), Günlük İşler (takvim, e-posta, öneriler vs.)	Biraz yetkinim	Hiç önemli değil	Hiç katılmıyorum	Hiç katılmıyorum	Katılıyorum	Katılmıyorum	Kararsızım	Kesinlikle Katılıyorum	Hiç katılmıyorum	Katılıyorum	Hiç katılmıyorum	Kesinlikle Katılıyorum	Katılmıyorum	Katılıyorum	Kararsızım	Katılıyorum	Katılmıyorum	Kararsızım	Katılıyorum	Katılmıyorum
2025-05-16 14:30:03	Erkek	29	Yüksek Lisans	Radyo Televizyon ve Sinema - Doktora Ders Dönemi	Bursa	Evet, kullanıyorum.	Evet, kullanıyorum.	ChatGPT, Grok	Evet, kullanıyorum.	Midjourney, Leonardo.ai	Evet, kullanıyorum.	Elevenlabs	3	Ara sıra kullanırım			Ara sıra kullanırım			Ara sıra kullanırım						Son 1 ay içinde	1		İçerik Üretimi (metin, görsel, ses), İş / Mesleki Amaçlar	Orta düzeyde yetkinim	Önemli	Katılıyorum	Kararsızım	Katılıyorum	Kesinlikle Katılıyorum	Katılıyorum	Katılıyorum	Katılıyorum	Kesinlikle Katılıyorum	Hiç katılmıyorum	Kesinlikle Katılıyorum	Kesinlikle katılıyorum	Kesinlikle katılıyorum	Kesinlikle katılıyorum	Kesinlikle katılıyorum	Kesinlikle katılıyorum	Katılıyorum	Katılıyorum	Kararsızım
2025-05-16 15:04:46	Kadın	23	Yüksek Lisans	Rts 1. Dönem YL	Konya	Evet, kullanıyorum.	Evet, kullanıyorum.	ChatGPT, Gemini, Perplexity	Hayır, kullanmıyorum.		Hayır, kullanmıyorum.		5	Çok sık kullanırım	Ara sıra kullanırım	Hiç kullanmam	Hiç kullanmam	Hiç kullanmam	Ara sıra kullanırım	Nadiren kullanırım	Hiç kullanmam	Hiç kullanmam	Hiç kullanmam	Hiç kullanmam	Hiç kullanmam	Bugün	4	450	Eğitim / Öğrenme, İçerik Üretimi (metin, görsel, ses), İş / Mesleki Amaçlar, Günlük İşler (takvim, e-posta, öneriler vs.), Eğlence	Çok yetkinim	Önemli	Katılıyorum	Kararsızım	Kesinlikle Katılıyorum	Kesinlikle Katılıyorum	Katılıyorum	Kararsızım	Kesinlikle Katılıyorum	Katılmıyorum	Kararsızım	Katılmıyorum	Kesinlikle katılıyorum	Kesinlikle katılıyorum	Katılıyorum	Katılıyorum	Kesinlikle katılıyorum	Kararsızım	Katılıyorum	Katılıyorum
2025-05-16 15:17:49	Kadın	26	Yüksek Lisans	İletişim bilimi ders dönemi	Konya	Evet, kullanıyorum.	Evet, kullanıyorum.	ChatGPT, Gemini, Copilot	Hayır, kullanmıyorum.		Hayır, kullanmıyorum.		4	Sık kullanırım	Sık kullanırım	Hiç kullanmam	Nadiren kullanırım	Ara sıra kullanırım	Hiç kullanmam	Hiç kullanmam	Hiç kullanmam	Hiç kullanmam	Hiç kullanmam	Nadiren kullanırım	Hiç kullanmam	Son 1 hafta içinde	1		Eğitim / Öğrenme, Eğlence	Orta düzeyde yetkinim	Önemli	Katılıyorum	Kararsızım	Kararsızım	Katılıyorum	Katılıyorum	Katılıyorum	Kararsızım	Katılıyorum	Hiç katılmıyorum	Kesinlikle Katılıyorum	Katılıyorum	Katılıyorum	Katılıyorum	Kesinlikle katılıyorum	Katılıyorum	Kararsızım	Katılıyorum	Kararsızım
2025-05-16 17:24:48	Kadın	22	Lisans	İngiliz Dili ve Edebiyatı- 3. Sınıf	Konya	Evet, kullanıyorum.	Evet, kullanıyorum.	ChatGPT, Perplexity	Hayır, kullanmıyorum.		Hayır, kullanmıyorum.		3	Sık kullanırım	Hiç kullanmam	Hiç kullanmam	Hiç kullanmam	Hiç kullanmam	Ara sıra kullanırım							Son 1 hafta içinde	1		Eğitim / Öğrenme, Günlük İşler (takvim, e-posta, öneriler vs.), Eğlence	Biraz yetkinim	Pek önemli değil	Katılıyorum	Katılmıyorum	Kesinlikle Katılıyorum	Katılıyorum	Kararsızım	Katılıyorum	Katılıyorum	Katılıyorum	Katılmıyorum	Kesinlikle Katılıyorum	Kesinlikle katılıyorum	Kesinlikle katılıyorum	Katılıyorum	Katılıyorum	Kararsızım	Katılmıyorum	Kararsızım	Kararsızım
2025-05-16 17:40:56	Kadın	22	Lisans	RTS-3. Sınıf	Konya	Evet, kullanıyorum.	Evet, kullanıyorum.	ChatGPT, Gemini	Hayır, kullanmıyorum.		Hayır, kullanmıyorum.		3	Çok sık kullanırım	Ara sıra kullanırım	Hiç kullanmam	Hiç kullanmam	Hiç kullanmam	Hiç kullanmam	Hiç kullanmam	Hiç kullanmam	Hiç kullanmam	Hiç kullanmam	Hiç kullanmam	Hiç kullanmam	Bugün	3		Eğitim / Öğrenme, İçerik Üretimi (metin, görsel, ses)	Orta düzeyde yetkinim	Orta düzeyde önemli	Kararsızım	Kararsızım	Kesinlikle Katılıyorum	Kesinlikle Katılıyorum	Kesinlikle Katılıyorum	Katılıyorum	Kesinlikle Katılıyorum	Kararsızım	Kesinlikle Katılıyorum	Kesinlikle Katılıyorum	Kesinlikle katılıyorum	Katılıyorum	Kesinlikle katılıyorum	Katılıyorum	Katılıyorum	Katılıyorum	Katılıyorum	Katılıyorum
2025-05-16 23:41:15	Erkek	24	Lisans	bilişim teknik servis	angara	Evet, kullanıyorum.	Evet, kullanıyorum.	ChatGPT, DeepSeek	Evet, kullanıyorum.	Midjourney	Evet, kullanıyorum.	Suno	1	Nadiren kullanırım		Nadiren kullanırım										Son 1 ay içinde	1	0	Eğlence, teoriler	Biraz yetkinim	Pek önemli değil	Kesinlikle Katılıyorum	Katılmıyorum	Kararsızım	Katılıyorum	Kesinlikle Katılıyorum	Katılıyorum	Kararsızım	Katılıyorum	Kararsızım	Kesinlikle Katılıyorum	Katılıyorum	Katılıyorum	Kesinlikle katılıyorum	Hiç katılmıyorum	Katılıyorum	Kesinlikle katılıyorum	Kesinlikle katılıyorum	Hiç katılmıyorum
2025-05-17 06:53:31	Erkek	23	Lisans	Radyo televizyon ve sinema - 4. Sınıf	Konya	Evet, kullanıyorum.	Evet, kullanıyorum.	ChatGPT, Gemini	Hayır, kullanmıyorum.		Hayır, kullanmıyorum.		4	Çok sık kullanırım	Nadiren kullanırım	Nadiren kullanırım	Nadiren kullanırım	Nadiren kullanırım	Hiç kullanmam	Hiç kullanmam	Hiç kullanmam	Hiç kullanmam	Hiç kullanmam	Hiç kullanmam	Hiç kullanmam	Son 1 hafta içinde	1	0	Eğitim / Öğrenme, Günlük İşler (takvim, e-posta, öneriler vs.)	Orta düzeyde yetkinim	Orta düzeyde önemli	Katılıyorum	Kararsızım	Katılıyorum	Katılıyorum	Katılıyorum	Katılıyorum	Kararsızım	Katılıyorum	Katılmıyorum	Katılıyorum	Katılıyorum	Katılıyorum	Katılıyorum	Katılıyorum	Katılıyorum	Katılıyorum	Katılıyorum	Katılmıyorum
2025-05-19 23:50:13	Erkek	44	Doktora	Rtv	Konya	Evet, kullanıyorum.	Evet, kullanıyorum.	ChatGPT, Gemini, Grok	Evet, kullanıyorum.	Midjourney, Dall-E, Flux	Evet, kullanıyorum.	Elevenlabs	4	Sık kullanırım	Sık kullanırım	Sık kullanırım	Ara sıra kullanırım	Ara sıra kullanırım	Ara sıra kullanırım	Ara sıra kullanırım	Sık kullanırım	Ara sıra kullanırım	Ara sıra kullanırım	Sık kullanırım	Ara sıra kullanırım	Bugün	5	500	Eğitim / Öğrenme, İçerik Üretimi (metin, görsel, ses), İş / Mesleki Amaçlar	Çok yetkinim	Önemli	Katılıyorum	Katılıyorum	Katılıyorum	Katılıyorum	Katılıyorum	Katılıyorum	Katılıyorum	Katılıyorum	Kararsızım	Kesinlikle Katılıyorum	Kesinlikle katılıyorum	Katılıyorum	Kesinlikle katılıyorum	Kesinlikle katılıyorum	Kesinlikle katılıyorum	Kesinlikle katılıyorum	Kesinlikle katılıyorum	Kesinlikle katılıyorum
2025-05-20 00:26:29	Erkek	43	Doktora	rtv	konya	Evet, kullanıyorum.	Evet, kullanıyorum.	ChatGPT	Evet, kullanıyorum.	Midjourney, Dall-E, Flux	Evet, kullanıyorum.	Elevenlabs	5	Nadiren kullanırım	Ara sıra kullanırım	Ara sıra kullanırım	Nadiren kullanırım	Nadiren kullanırım	Sık kullanırım	Sık kullanırım	Ara sıra kullanırım	Sık kullanırım	Ara sıra kullanırım	Ara sıra kullanırım	Ara sıra kullanırım	Daha uzun süre önce	5	500	İş / Mesleki Amaçlar	Hiç yetkin hissetmiyorum	Orta düzeyde önemli	Katılıyorum	Katılıyorum	Katılıyorum	Katılıyorum	Katılıyorum	Katılıyorum	Katılıyorum	Katılıyorum	Katılıyorum	Katılıyorum	Katılıyorum	Katılıyorum	Katılıyorum	Katılıyorum	Katılıyorum	Katılıyorum	Katılıyorum	Katılıyorum
2025-05-20 21:37:01	Erkek	44	Yüksek Lisans		Kirklareli	Hayır, kullanmıyorum.
2025-05-20 21:45:31	Kadın	16	Lisans	İngiliz dili ve edebiyatı	Kırklareli	Evet, kullanıyorum.	Evet, kullanıyorum.	ChatGPT, DeepSeek	Hayır, kullanmıyorum.		Hayır, kullanmıyorum.		5	Çok sık kullanırım		Ara sıra kullanırım										Bugün	1	0	Günlük İşler (takvim, e-posta, öneriler vs.), Eğlence	Orta düzeyde yetkinim	Orta düzeyde önemli	Kesinlikle Katılıyorum	Kesinlikle Katılıyorum	Katılıyorum	Kesinlikle Katılıyorum	Kararsızım	Kesinlikle Katılıyorum	Kesinlikle Katılıyorum	Hiç katılmıyorum	Kesinlikle Katılıyorum	Katılmıyorum	Kesinlikle katılıyorum	Kesinlikle katılıyorum	Kesinlikle katılıyorum	Kararsızım	Katılmıyorum	Kesinlikle katılıyorum	Kesinlikle katılıyorum	Kesinlikle katılıyorum
2025-05-20 21:48:40	Erkek	32	Yüksek Lisans	Radyo Sinema ve Televizyon - mezun	Konya	Evet, kullanıyorum.	Evet, kullanıyorum.	ChatGPT, DeepSeek	Evet, kullanıyorum.	Midjourney, Kling	Hayır, kullanmıyorum.		4	Sık kullanırım	Ara sıra kullanırım	Ara sıra kullanırım				Ara sıra kullanırım			Ara sıra kullanırım			Son 1 hafta içinde	4	Ortalama 3500 tl	Eğitim / Öğrenme, İçerik Üretimi (metin, görsel, ses)	Orta düzeyde yetkinim	Orta düzeyde önemli	Kararsızım	Kararsızım	Katılıyorum	Katılıyorum	Kararsızım	Katılıyorum	Katılıyorum	Katılıyorum	Katılıyorum	Katılıyorum	Kararsızım	Katılıyorum	Katılıyorum	Katılıyorum	Katılıyorum	Katılıyorum	Katılıyorum	Katılıyorum
2025-05-20 21:53:43	Erkek	31	Lisans	İşletme	Konya	Hayır, kullanmıyorum.
2025-05-20 22:07:42	Erkek	45	Doktora	Çizgi film be animasyon	Eskişehir	Evet, kullanıyorum.	Evet, kullanıyorum.	ChatGPT, Gemini, DeepSeek, Claude ai	Evet, kullanıyorum.	Dall-E, Runway ML, Sora, Kling	Hayır, kullanmıyorum.		5	Ara sıra kullanırım	Ara sıra kullanırım	Hiç kullanmam	Hiç kullanmam	Hiç kullanmam	Hiç kullanmam	Hiç kullanmam	Ara sıra kullanırım	Hiç kullanmam	Hiç kullanmam	Nadiren kullanırım	Nadiren kullanırım	Bugün	3	1200	Eğitim / Öğrenme, İçerik Üretimi (metin, görsel, ses), İş / Mesleki Amaçlar, Günlük İşler (takvim, e-posta, öneriler vs.), Eğlence	Çok yetkinim	Önemli	Kesinlikle Katılıyorum	Kesinlikle Katılıyorum	Kesinlikle Katılıyorum	Kesinlikle Katılıyorum	Kesinlikle Katılıyorum	Kesinlikle Katılıyorum	Kesinlikle Katılıyorum	Katılıyorum	Kararsızım	Kararsızım	Kesinlikle katılıyorum	Kesinlikle katılıyorum	Kesinlikle katılıyorum	Kesinlikle katılıyorum	Kesinlikle katılıyorum	Kesinlikle katılıyorum	Kesinlikle katılıyorum	Katılıyorum
2025-05-20 22:21:41	Kadın	42	Lisans	Çalışma ekonomisi	Kırklareli	Evet, kullanıyorum.	Evet, kullanıyorum.	ChatGPT, Gemini	Hayır, kullanmıyorum.		Hayır, kullanmıyorum.		2	Ara sıra kullanırım	Nadiren kullanırım	Hiç kullanmam	Hiç kullanmam	Hiç kullanmam	Hiç kullanmam	Hiç kullanmam	Hiç kullanmam	Hiç kullanmam	Hiç kullanmam	Hiç kullanmam	Hiç kullanmam	Son 1 hafta içinde	1	0	Eğitim / Öğrenme, İçerik Üretimi (metin, görsel, ses), Günlük İşler (takvim, e-posta, öneriler vs.)	Orta düzeyde yetkinim	Önemli	Katılıyorum	Katılıyorum	Katılıyorum	Katılıyorum	Katılıyorum	Katılıyorum	Katılıyorum	Kararsızım	Katılıyorum	Katılıyorum	Kesinlikle katılıyorum	Kesinlikle katılıyorum	Kesinlikle katılıyorum	Kesinlikle katılıyorum	Kesinlikle katılıyorum	Katılıyorum	Kesinlikle katılıyorum	Katılıyorum
2025-05-20 23:51:20	Erkek	30	Lisans	Elektrik elektronik mühendisliği	Konya	Evet, kullanıyorum.	Evet, kullanıyorum.	ChatGPT	Evet, kullanıyorum.	Midjourney	Evet, kullanıyorum.	Elevenlabs	4	Sık kullanırım												Bugün	1		Eğitim / Öğrenme	Yetkinim	Orta düzeyde önemli	Kararsızım	Kararsızım	Kararsızım	Kararsızım	Kararsızım	Kararsızım	Kararsızım	Kararsızım	Kararsızım	Kararsızım	Kararsızım	Kararsızım	Kararsızım	Kararsızım	Kararsızım	Kararsızım	Kararsızım	Kararsızım
2025-05-21 00:34:52	Erkek	31	Lisans	Kamu yönetimi	Konya	Evet, kullanıyorum.	Evet, kullanıyorum.	ChatGPT	Evet, kullanıyorum.	Leonardo.ai, Kling	Evet, kullanıyorum.	Elevenlabs	5	Çok sık kullanırım	Hiç kullanmam	Hiç kullanmam	Hiç kullanmam	Nadiren kullanırım	Hiç kullanmam	Hiç kullanmam	Hiç kullanmam	Hiç kullanmam	Çok sık kullanırım	Hiç kullanmam	Nadiren kullanırım	Bugün	3	1500 tl	İçerik Üretimi (metin, görsel, ses)	Orta düzeyde yetkinim	Önemli	Katılıyorum	Katılıyorum	Katılıyorum	Katılıyorum	Katılıyorum	Katılıyorum	Katılıyorum	Katılıyorum	Hiç katılmıyorum	Katılıyorum	Katılıyorum	Katılıyorum	Katılıyorum	Katılıyorum	Katılıyorum	Katılıyorum	Katılıyorum	Katılıyorum
2025-05-22 11:01:55	Erkek	33	Lisans	Sosyal bilgiler öğretmenliği- Mezun	Konya	Hayır, kullanmıyorum.
2025-05-22 11:05:56	Erkek	32	Yüksek Lisans	Yönetim bilişim sistemleri yüksek lisans	Konya	Evet, kullanıyorum.	Evet, kullanıyorum.	ChatGPT, Gemini, Grok, Copilot,	Evet, kullanıyorum.	Midjourney, Dall-E, Flux, Leonardo.ai, Runway ML, Sora, Kling	Evet, kullanıyorum.	Elevenlabs, Suno	5	Çok sık kullanırım	Sık kullanırım		Çok sık kullanırım			Sık kullanırım	Sık kullanırım	Sık kullanırım	Sık kullanırım	Sık kullanırım	Sık kullanırım	Bugün	5	120 USD	Eğitim / Öğrenme, İçerik Üretimi (metin, görsel, ses), İş / Mesleki Amaçlar	Yetkinim	Önemli	Katılıyorum	Katılıyorum	Katılıyorum	Katılıyorum	Katılıyorum	Katılıyorum	Katılıyorum	Katılıyorum	Katılıyorum	Katılıyorum	Katılıyorum	Katılıyorum	Katılıyorum	Katılıyorum	Katılıyorum	Katılıyorum	Katılıyorum	Katılıyorum
2025-05-26 16:01:30	Kadın	45	Doktora	TIP FAKÜLTESİ- MEZUN	KONYA	Evet, kullanıyorum.	Evet, kullanıyorum.	ChatGPT, DeepSeek	Evet, kullanıyorum.	Sora	Hayır, kullanmıyorum.		4	Sık kullanırım	Hiç kullanmam	Ara sıra kullanırım	Hiç kullanmam	Hiç kullanmam	Hiç kullanmam	Hiç kullanmam	Hiç kullanmam	Hiç kullanmam	Hiç kullanmam	Ara sıra kullanırım	Hiç kullanmam	Bugün	4	20 USD	Eğitim / Öğrenme, İş / Mesleki Amaçlar	Yetkinim	Orta düzeyde önemli	Katılıyorum	Katılıyorum	Katılıyorum	Katılıyorum	Katılıyorum	Katılıyorum	Katılıyorum	Katılıyorum	Katılmıyorum	Katılıyorum	Katılıyorum	Katılıyorum	Katılıyorum	Katılıyorum	Katılıyorum	Katılıyorum	Katılıyorum	Katılıyorum
2025-05-26 16:07:07	Erkek	28	Lisans	Türkçe öğretmenliği eğitim fakültesi	Kırıkkale	Hayır, kullanmıyorum.
2025-05-26 16:09:59	Erkek	23	Lisans	Edebiyat 3. Sınıf	Kırıkkale	Evet, kullanıyorum.	Hayır, kullanmıyorum.		Hayır, kullanmıyorum.		Evet, kullanıyorum.	Suno	2	Sık kullanırım	Hiç kullanmam	Hiç kullanmam	Hiç kullanmam	Nadiren kullanırım	Ara sıra kullanırım	Ara sıra kullanırım	Ara sıra kullanırım	Hiç kullanmam	Hiç kullanmam	Hiç kullanmam	Hiç kullanmam	Son 1 hafta içinde	1	25	Eğitim / Öğrenme, İş / Mesleki Amaçlar	Biraz yetkinim	Orta düzeyde önemli	Hiç katılmıyorum	Katılmıyorum	Katılmıyorum	Hiç katılmıyorum	Hiç katılmıyorum	Katılmıyorum	Katılmıyorum	Hiç katılmıyorum	Katılmıyorum	Katılmıyorum	Hiç katılmıyorum	Katılmıyorum	Katılmıyorum	Hiç katılmıyorum	Hiç katılmıyorum	Hiç katılmıyorum	Katılmıyorum	Katılmıyorum
2025-05-26 16:11:10	Erkek	23	Yüksek Lisans	Sağlık yönetimi yüksek lisans	Hatay	Evet, kullanıyorum.	Evet, kullanıyorum.	ChatGPT, Grok	Hayır, kullanmıyorum.		Evet, kullanıyorum.	Suno	3	Sık kullanırım	Ara sıra kullanırım	Sık kullanırım	Çok sık kullanırım	Ara sıra kullanırım	Hiç kullanmam	Hiç kullanmam	Hiç kullanmam	Hiç kullanmam	Hiç kullanmam	Hiç kullanmam	Hiç kullanmam	Son 1 hafta içinde	1	0	Eğitim / Öğrenme, Günlük İşler (takvim, e-posta, öneriler vs.), Eğlence	Orta düzeyde yetkinim	Orta düzeyde önemli	Katılıyorum	Katılıyorum	Katılıyorum	Katılıyorum	Katılıyorum	Kesinlikle katılıyorum	Katılıyorum	Katılıyorum	Katılıyorum	Katılıyorum	Katılıyorum	Katılıyorum	Kesinlikle katılıyorum	Kesinlikle katılıyorum	Katılıyorum	Katılıyorum	Katılıyorum	Katılıyorum
2025-05-26 16:13:37	Erkek	24	Lisans	Siyaset Bilimi ve Kamu Yönetimi - 4. Sınıf	Kırıkkale	Evet, kullanıyorum.	Evet, kullanıyorum.	ChatGPT	Hayır, kullanmıyorum.		Hayır, kullanmıyorum.		4	Sık kullanırım	Hiç kullanmam	Hiç kullanmam	Hiç kullanmam	Hiç kullanmam	Hiç kullanmam	Hiç kullanmam	Hiç kullanmam	Hiç kullanmam	Hiç kullanmam	Hiç kullanmam	Hiç kullanmam	Son 1 hafta içinde	1	0 Tl	Eğitim / Öğrenme, Eğlence	Orta düzeyde yetkinim	Pek önemli değil	Katılıyorum	Katılıyorum	Katılıyorum	Katılıyorum	Katılıyorum	Katılıyorum	Katılıyorum	Kararsızım	Kararsızım	Kesinlikle katılıyorum	Katılıyorum	Kesinlikle katılıyorum	Kesinlikle katılıyorum	Kesinlikle katılıyorum	Kesinlikle katılıyorum	Kesinlikle katılıyorum	Kesinlikle katılıyorum	Kesinlikle katılıyorum
2025-05-26 16:13:59	Kadın	44	Doktora	Tıbbi genetik asistan 2. Yıl		Evet, kullanıyorum.	Evet, kullanıyorum.	ChatGPT	Hayır, kullanmıyorum.		Hayır, kullanmıyorum.		4	Çok sık kullanırım												Son 1 hafta içinde	1		Eğitim / Öğrenme, İş / Mesleki Amaçlar, Günlük İşler (takvim, e-posta, öneriler vs.)	Biraz yetkinim	Önemli	Katılmıyorum	Katılmıyorum	Kararsızım	Katılıyorum	Katılmıyorum	Kararsızım	Kararsızım	Kararsızım	Katılıyorum	Kararsızım	Katılıyorum	Katılıyorum	Katılıyorum	Kararsızım	Kesinlikle katılıyorum	Kesinlikle katılıyorum	Kesinlikle katılıyorum	Katılıyorum
2025-05-26 16:14:06	Erkek	23	Lisans	Hemşirelik-3.sınıf	Kırıkkale	Evet, kullanıyorum.	Evet, kullanıyorum.	ChatGPT	Hayır, kullanmıyorum.		Hayır, kullanmıyorum.		2	Nadiren kullanırım												Son 1 ay içinde	1	0 TL	Eğitim / Öğrenme	Orta düzeyde yetkinim	Pek önemli değil	Kararsızım	Kararsızım	Kararsızım	Kararsızım	Kararsızım	Kararsızım	Kararsızım	Kararsızım	Kararsızım	Kararsızım	Katılıyorum	Katılıyorum	Katılıyorum	Katılıyorum	Katılıyorum	Katılıyorum	Katılıyorum	Katılıyorum
2025-05-26 16:14:48	Erkek	25	Lisans	Tarih	Kırıkkale	Evet, kullanıyorum.	Evet, kullanıyorum.	ChatGPT	Evet, kullanıyorum.	Midjourney	Evet, kullanıyorum.	Elevenlabs	5	Çok sık kullanırım	Ara sıra kullanırım	Ara sıra kullanırım	Sık kullanırım	Sık kullanırım	Sık kullanırım	Sık kullanırım	Ara sıra kullanırım	Ara sıra kullanırım	Ara sıra kullanırım	Ara sıra kullanırım	Ara sıra kullanırım	Bugün	5	0	Eğitim / Öğrenme	Hiç yetkin hissetmiyorum	Hiç önemli değil	Kararsızım	Kararsızım	Kararsızım	Kararsızım	Kararsızım	Kararsızım	Kararsızım	Katılmıyorum	Katılmıyorum	Katılmıyorum	Katılmıyorum	Hiç katılmıyorum	Katılmıyorum	Katılmıyorum	Katılmıyorum	Katılmıyorum	Katılmıyorum	Katılmıyorum
2025-05-26 16:15:37	Erkek	28	Lisans	Bilgisayar mühendisliği	Kırıkkale	Evet, kullanıyorum.	Evet, kullanıyorum.	Grok	Evet, kullanıyorum.	Midjourney, Dall-E, Flux, Leonardo.ai, Runway ML	Evet, kullanıyorum.	Suno, MMAudio	5	Nadiren kullanırım	Ara sıra kullanırım	Nadiren kullanırım	Ara sıra kullanırım	Nadiren kullanırım	Nadiren kullanırım	Hiç kullanmam	Hiç kullanmam	Nadiren kullanırım	Hiç kullanmam	Ara sıra kullanırım	Hiç kullanmam	Bugün	1	20 USD	Eğitim / Öğrenme, İş / Mesleki Amaçlar, Günlük İşler (takvim, e-posta, öneriler vs.)	Orta düzeyde yetkinim	Orta düzeyde önemli	Katılmıyorum	Katılmıyorum	Hiç katılmıyorum	Hiç katılmıyorum	Hiç katılmıyorum	Katılmıyorum	Hiç katılmıyorum	Katılmıyorum	Katılmıyorum	Hiç katılmıyorum	Katılmıyorum	Hiç katılmıyorum	Hiç katılmıyorum	Hiç katılmıyorum	Hiç katılmıyorum	Hiç katılmıyorum	Katılmıyorum	Katılmıyorum
2025-05-26 16:16:34	Erkek	27	Lisans	Raylı sistemler	Ankara	Hayır, kullanmıyorum.
2025-05-26 16:16:48	Kadın	22	Lisans	radyo tv 4.sınıf	konya	Evet, kullanıyorum.	Evet, kullanıyorum.	ChatGPT, Gemini	Evet, kullanıyorum.	Sora	Evet, kullanıyorum.	Suno	4	Çok sık kullanırım	Ara sıra kullanırım	Hiç kullanmam	Hiç kullanmam	Nadiren kullanırım	Hiç kullanmam	Hiç kullanmam	Hiç kullanmam	Hiç kullanmam	Hiç kullanmam	Ara sıra kullanırım	Hiç kullanmam	Son 1 hafta içinde	1	0	Eğitim / Öğrenme, İçerik Üretimi (metin, görsel, ses), İş / Mesleki Amaçlar, Günlük İşler (takvim, e-posta, öneriler vs.), Eğlence	Orta düzeyde yetkinim	Orta düzeyde önemli	Kararsızım	Kararsızım	Katılıyorum	Kesinlikle katılıyorum	Kesinlikle katılıyorum	Kesinlikle katılıyorum	Katılıyorum	Kararsızım	Kararsızım	Kesinlikle katılıyorum	Katılıyorum	Kesinlikle katılıyorum	Kesinlikle katılıyorum	Kesinlikle katılıyorum	Katılıyorum	Katılmıyorum	Katılıyorum	Kararsızım
2025-05-26 16:17:28	Erkek	19	Lisans	Maliye	Konya	Evet, kullanıyorum.	Hayır, kullanmıyorum.		Evet, kullanıyorum.	Midjourney, Dall-E, Flux, Leonardo.ai, Runway ML, Sora, Kling	Hayır, kullanmıyorum.		3	Sık kullanırım	Sık kullanırım	Hiç kullanmam	Hiç kullanmam	Hiç kullanmam	Hiç kullanmam	Hiç kullanmam	Hiç kullanmam	Hiç kullanmam	Hiç kullanmam	Hiç kullanmam	Hiç kullanmam	Bugün	1		Eğitim / Öğrenme, İçerik Üretimi (metin, görsel, ses), İş / Mesleki Amaçlar, Günlük İşler (takvim, e-posta, öneriler vs.), Eğlence	Orta düzeyde yetkinim	Orta düzeyde önemli	Hiç katılmıyorum	Hiç katılmıyorum	Hiç katılmıyorum	Katılmıyorum	Hiç katılmıyorum	Hiç katılmıyorum	Hiç katılmıyorum	Hiç katılmıyorum	Hiç katılmıyorum	Hiç katılmıyorum	Kesinlikle katılıyorum	Kesinlikle katılıyorum	Kesinlikle katılıyorum	Kesinlikle katılıyorum	Kesinlikle katılıyorum	Kesinlikle katılıyorum	Kesinlikle katılıyorum	Kesinlikle katılıyorum
2025-05-26 16:23:39	Erkek	22	Lisans	Bilgisayar programcılığı	Ankara	Evet, kullanıyorum.	Evet, kullanıyorum.	ChatGPT, DeepSeek, Grok	Evet, kullanıyorum.	Midjourney	Evet, kullanıyorum.	MMAudio	5	Çok sık kullanırım		Sık kullanırım	Ara sıra kullanırım									Bugün	3	30USD	Eğitim / Öğrenme, İçerik Üretimi (metin, görsel, ses), İş / Mesleki Amaçlar	Orta düzeyde yetkinim	Önemli	Katılıyorum	Katılıyorum	Katılıyorum	Katılıyorum	Katılıyorum	Kesinlikle katılıyorum	Katılıyorum	Katılıyorum	Hiç katılmıyorum	Kesinlikle katılıyorum	Katılıyorum	Katılıyorum	Kararsızım	Katılıyorum	Katılıyorum	Katılmıyorum	Katılmıyorum	Kesinlikle katılıyorum
2025-05-26 16:24:53	Erkek	20	Lisans	Bilgisayar mühendisliği - 4. Sınıf	Ankara	Hayır, kullanmıyorum.
2025-05-26 16:26:58	Kadın	21	Lisans	Adalet	Ankara	Evet, kullanıyorum.	Evet, kullanıyorum.	ChatGPT	Hayır, kullanmıyorum.		Hayır, kullanmıyorum.		3	Sık kullanırım	Ara sıra kullanırım	Hiç kullanmam	Hiç kullanmam	Hiç kullanmam	Hiç kullanmam	Hiç kullanmam	Hiç kullanmam	Hiç kullanmam	Hiç kullanmam	Hiç kullanmam	Hiç kullanmam	Son 1 hafta içinde	1	Ödemiyorum	Eğitim / Öğrenme, İçerik Üretimi (metin, görsel, ses), İş / Mesleki Amaçlar	Orta düzeyde yetkinim	Orta düzeyde önemli	Kesinlikle katılıyorum	Kararsızım	Katılıyorum	Katılıyorum	Kararsızım	Kesinlikle katılıyorum	Kesinlikle katılıyorum	Kesinlikle katılıyorum	Hiç katılmıyorum	Kesinlikle katılıyorum	Kesinlikle katılıyorum	Kesinlikle katılıyorum	Kesinlikle katılıyorum	Kesinlikle katılıyorum	Kesinlikle katılıyorum	Kararsızım	Kesinlikle katılıyorum	Kesinlikle katılıyorum
2025-05-26 16:29:55	Erkek	25	Lisans	Bilgisayar mühendisliği-4. Sınıf	Kırıkkale	Evet, kullanıyorum.	Evet, kullanıyorum.	ChatGPT, Gemini, Copilot	Hayır, kullanmıyorum.		Hayır, kullanmıyorum.		3	Ara sıra kullanırım	Ara sıra kullanırım	Hiç kullanmam	Hiç kullanmam	Ara sıra kullanırım	Hiç kullanmam	Nadiren kullanırım	Hiç kullanmam	Hiç kullanmam		Hiç kullanmam	Hiç kullanmam	Son 1 ay içinde	1		Eğitim / Öğrenme, İçerik Üretimi (metin, görsel, ses)	Orta düzeyde yetkinim	Pek önemli değil	Katılıyorum	Katılıyorum	Katılıyorum	Katılıyorum	Katılıyorum	Katılıyorum	Katılıyorum	Katılıyorum	Katılıyorum	Katılıyorum	Katılıyorum	Katılıyorum	Katılıyorum	Katılıyorum	Katılıyorum	Katılıyorum	Katılıyorum	Katılıyorum
2025-05-26 16:31:06	Kadın	51	Lisans	AÖF Sosyal Bilimler 1. Sınıf	Ankara	Hayır, kullanmıyorum.
2025-05-26 16:32:21	Erkek	28	Lisans		Kırıkkale	Hayır, kullanmıyorum.
2025-05-26 16:37:38	Erkek	24	Lisans	İnşaat mühendisliği - 4. Sınıf	Kırıkkale	Hayır, kullanmıyorum.
2025-05-26 16:40:29	Kadın	26	Lisans	Radyo Televizyon ve Sinema - 4.sınıf	Ankara	Evet, kullanıyorum.	Evet, kullanıyorum.	ChatGPT, DeepSeek, Copilot	Evet, kullanıyorum.	Sora, Kling	Evet, kullanıyorum.	Suno	4	Sık kullanırım	Ara sıra kullanırım	Sık kullanırım	Nadiren kullanırım	Sık kullanırım	Hiç kullanmam	Hiç kullanmam	Nadiren kullanırım	Hiç kullanmam	Sık kullanırım	Ara sıra kullanırım	Hiç kullanmam	Bugün	2	400 +	Eğitim / Öğrenme, İçerik Üretimi (metin, görsel, ses), Günlük İşler (takvim, e-posta, öneriler vs.)	Biraz yetkinim	Önemli	Kararsızım	Kararsızım	Katılıyorum	Kesinlikle katılıyorum	Katılıyorum	Katılıyorum	Katılıyorum	Katılıyorum	Hiç katılmıyorum	Kesinlikle katılıyorum	Kesinlikle katılıyorum	Kesinlikle katılıyorum	Kesinlikle katılıyorum	Katılıyorum	Kesinlikle katılıyorum	Katılıyorum	Kesinlikle katılıyorum	Katılıyorum
2025-05-26 16:45:06	Erkek	25	Lisans	besyo 2	konya	Evet, kullanıyorum.	Evet, kullanıyorum.	ChatGPT, Gemini, DeepSeek, Perplexity	Evet, kullanıyorum.	Midjourney, Dall-E, Runway ML, Sora	Evet, kullanıyorum.	Elevenlabs, MMAudio	5	Çok sık kullanırım	Ara sıra kullanırım			Ara sıra kullanırım				Ara sıra kullanırım				Son 1 hafta içinde	1	300tl	Eğitim / Öğrenme, İş / Mesleki Amaçlar	Yetkinim	Vazgeçilmez	Kesinlikle katılıyorum	Kesinlikle katılıyorum	Kesinlikle katılıyorum	Kesinlikle katılıyorum	Kesinlikle katılıyorum	Kesinlikle katılıyorum	Kesinlikle katılıyorum	Kesinlikle katılıyorum	Kesinlikle katılıyorum	Kesinlikle katılıyorum	Kesinlikle katılıyorum	Kesinlikle katılıyorum	Kesinlikle katılıyorum	Kesinlikle katılıyorum	Kesinlikle katılıyorum	Kesinlikle katılıyorum	Kesinlikle katılıyorum	Kesinlikle katılıyorum
2025-05-26 16:45:29	Erkek	32	Lisans	Radyo ve televizyon	Konya	Evet, kullanıyorum.	Evet, kullanıyorum.	ChatGPT	Evet, kullanıyorum.	Midjourney	Evet, kullanıyorum.	Elevenlabs	3	Nadiren kullanırım	Ara sıra kullanırım	Nadiren kullanırım	Nadiren kullanırım	Ara sıra kullanırım		Nadiren kullanırım	Nadiren kullanırım	Hiç kullanmam	Nadiren kullanırım	Ara sıra kullanırım	Nadiren kullanırım	Son 1 hafta içinde	2	500 tl	İçerik Üretimi (metin, görsel, ses)	Orta düzeyde yetkinim	Önemli	Katılıyorum	Katılıyorum	Katılıyorum	Katılıyorum	Katılıyorum	Katılıyorum	Katılıyorum	Katılıyorum	Hiç katılmıyorum	Kesinlikle katılıyorum	Kesinlikle katılıyorum	Kesinlikle katılıyorum	Kesinlikle katılıyorum	Kesinlikle katılıyorum	Kesinlikle katılıyorum	Kesinlikle katılıyorum	Kesinlikle katılıyorum	Katılıyorum
2025-05-26 16:57:24	Kadın	21	Lisans	Siyaset bilimi ve uluslarası ilişkiler 1. sınıf	istanbul	Evet, kullanıyorum.	Evet, kullanıyorum.	ChatGPT, DeepSeek	Hayır, kullanmıyorum.		Hayır, kullanmıyorum.		5	Çok sık kullanırım	Hiç kullanmam	Nadiren kullanırım	Hiç kullanmam	Hiç kullanmam	Hiç kullanmam	Hiç kullanmam	Hiç kullanmam	Hiç kullanmam	Hiç kullanmam	Hiç kullanmam	Hiç kullanmam	Bugün	4	500TL	Eğitim / Öğrenme, İçerik Üretimi (metin, görsel, ses)	Orta düzeyde yetkinim	Önemli	Katılıyorum	Kararsızım	Kesinlikle katılıyorum	Katılıyorum	Kararsızım	Kararsızım	Katılıyorum	Katılmıyorum	Kararsızım	Kararsızım	Kesinlikle katılıyorum	Kesinlikle katılıyorum	Kesinlikle katılıyorum	Katılıyorum	Katılıyorum	Katılıyorum	Kararsızım	Katılmıyorum
2025-05-26 16:59:35	Kadın	21	Lisans	yönetim bilişim sistemleri- 4. sınıf	ankara	Evet, kullanıyorum.	Evet, kullanıyorum.	ChatGPT, Gemini, DeepSeek, Grok, Copilot	Evet, kullanıyorum.	Midjourney, Dall-E, Flux	Evet, kullanıyorum.	Elevenlabs, Suno	4	Sık kullanırım	Sık kullanırım	Sık kullanırım	Ara sıra kullanırım	Ara sıra kullanırım	Ara sıra kullanırım	Ara sıra kullanırım	Ara sıra kullanırım	Nadiren kullanırım	Nadiren kullanırım	Ara sıra kullanırım	Ara sıra kullanırım	Son 1 hafta içinde	1		Eğitim / Öğrenme, İçerik Üretimi (metin, görsel, ses), Günlük İşler (takvim, e-posta, öneriler vs.)	Yetkinim	Önemli	Kararsızım	Kararsızım	Kararsızım	Kararsızım	Kararsızım	Kararsızım	Kararsızım	Kararsızım	Kararsızım	Kararsızım	Kararsızım	Kararsızım	Kararsızım	Kararsızım	Kararsızım	Kararsızım	Kararsızım	Kararsızım
2025-05-26 17:23:19	Erkek	26	Lisans	Kimya mühendisliği	Kırıkkale	Evet, kullanıyorum.	Evet, kullanıyorum.	ChatGPT, Gemini	Hayır, kullanmıyorum.		Hayır, kullanmıyorum.		3	Sık kullanırım	Sık kullanırım	Ara sıra kullanırım	Ara sıra kullanırım	Ara sıra kullanırım	Ara sıra kullanırım							Bugün	1	15 usd	Eğitim / Öğrenme	Biraz yetkinim	Orta düzeyde önemli	Hiç katılmıyorum	Hiç katılmıyorum	Hiç katılmıyorum	Katılmıyorum	Katılmıyorum	Katılmıyorum	Hiç katılmıyorum	Hiç katılmıyorum	Hiç katılmıyorum	Hiç katılmıyorum	Katılıyorum	Katılıyorum	Katılıyorum	Katılıyorum	Katılıyorum	Katılıyorum	Katılıyorum	Katılıyorum
2025-05-26 17:41:55	Erkek	31	Doktora	Tıp Fakültesi/ tıbbi genetik	Konya	Evet, kullanıyorum.	Evet, kullanıyorum.	ChatGPT, DeepSeek	Hayır, kullanmıyorum.		Hayır, kullanmıyorum.		4	Sık kullanırım	Hiç kullanmam	Sık kullanırım	Hiç kullanmam	Hiç kullanmam	Hiç kullanmam	Hiç kullanmam	Hiç kullanmam	Hiç kullanmam	Hiç kullanmam	Hiç kullanmam	Hiç kullanmam	Bugün	1	0	Eğitim / Öğrenme, İçerik Üretimi (metin, görsel, ses), İş / Mesleki Amaçlar	Orta düzeyde yetkinim	Önemli	Katılıyorum	Kararsızım	Katılıyorum	Katılıyorum	Kararsızım	Katılıyorum	Katılıyorum	Katılıyorum	Katılıyorum	Katılıyorum	Katılıyorum	Katılıyorum	Katılıyorum	Katılıyorum	Katılıyorum	Katılıyorum	Katılıyorum	Katılıyorum
2025-05-26 17:48:34	Kadın	22	Lisans	Endüstri mühendisliği 2.sınıf	Aksaray	Evet, kullanıyorum.	Evet, kullanıyorum.	ChatGPT, DeepSeek	Hayır, kullanmıyorum.		Hayır, kullanmıyorum.		5	Çok sık kullanırım	Ara sıra kullanırım	Sık kullanırım	Ara sıra kullanırım	Hiç kullanmam	Hiç kullanmam	Hiç kullanmam	Hiç kullanmam	Hiç kullanmam	Hiç kullanmam	Hiç kullanmam	Hiç kullanmam	Bugün	4	500 TL	Eğitim / Öğrenme, İçerik Üretimi (metin, görsel, ses), Eğlence	Yetkinim	Vazgeçilmez	Katılıyorum	Katılıyorum	Katılıyorum	Katılıyorum	Katılıyorum	Katılıyorum	Katılıyorum	Kararsızım	Katılmıyorum	Katılıyorum	Katılıyorum	Kesinlikle katılıyorum	Kesinlikle katılıyorum	Kesinlikle katılıyorum	Katılıyorum	Kararsızım	Katılıyorum	Katılıyorum
2025-05-26 18:00:40	Kadın	23	Lisans	Dil ve konuşma terapisi 4. Sınıf	İstanbul	Evet, kullanıyorum.	Evet, kullanıyorum.	ChatGPT	Hayır, kullanmıyorum.		Hayır, kullanmıyorum.		4	Sık kullanırım	Hiç kullanmam	Hiç kullanmam	Hiç kullanmam	Hiç kullanmam	Hiç kullanmam	Hiç kullanmam	Hiç kullanmam	Hiç kullanmam	Hiç kullanmam	Hiç kullanmam	Hiç kullanmam	Bugün	2	200	Eğitim / Öğrenme, İş / Mesleki Amaçlar, Günlük İşler (takvim, e-posta, öneriler vs.), Eğlence	Yetkinim	Önemli	Kararsızım	Katılıyorum	Katılıyorum	Katılıyorum	Katılıyorum	Katılıyorum	Katılıyorum	Kararsızım	Katılıyorum	Kararsızım	Katılıyorum	Katılıyorum	Katılıyorum	Katılıyorum	Katılıyorum	Katılıyorum	Katılıyorum	Katılıyorum
2025-05-26 18:26:08	Erkek	27	Lisans		Ankara	Evet, kullanıyorum.	Evet, kullanıyorum.	ChatGPT	Hayır, kullanmıyorum.		Hayır, kullanmıyorum.		1	Nadiren kullanırım	Hiç kullanmam	Hiç kullanmam	Hiç kullanmam	Hiç kullanmam	Hiç kullanmam	Hiç kullanmam	Hiç kullanmam	Hiç kullanmam	Hiç kullanmam	Hiç kullanmam	Hiç kullanmam	Daha uzun süre önce	1	0	Eğitim / Öğrenme	Orta düzeyde yetkinim	Pek önemli değil	Kararsızım	Kararsızım	Kararsızım	Kararsızım	Kararsızım	Kararsızım	Kararsızım	Kararsızım	Kararsızım	Kararsızım	Kararsızım	Kararsızım	Kararsızım	Kararsızım	Kararsızım	Kararsızım	Kararsızım	Kararsızım
2025-05-26 18:26:16	Erkek	27	Lisans		Ankara	Evet, kullanıyorum.	Evet, kullanıyorum.	ChatGPT	Hayır, kullanmıyorum.		Hayır, kullanmıyorum.		1	Nadiren kullanırım	Hiç kullanmam	Hiç kullanmam	Hiç kullanmam	Hiç kullanmam	Hiç kullanmam	Hiç kullanmam	Hiç kullanmam	Hiç kullanmam	Hiç kullanmam	Hiç kullanmam	Hiç kullanmam	Daha uzun süre önce	1	0	Eğitim / Öğrenme	Orta düzeyde yetkinim	Pek önemli değil	Kararsızım	Kararsızım	Kararsızım	Kararsızım	Kararsızım	Kararsızım	Kararsızım	Kararsızım	Kararsızım	Kararsızım	Kararsızım	Kararsızım	Kararsızım	Kararsızım	Kararsızım	Kararsızım	Kararsızım	Kararsızım
2025-05-26 18:38:42	Erkek	26	Lisans		Kırıkkale	Hayır, kullanmıyorum.
2025-05-26 19:17:13	Kadın	25	Lisans	şehir ve bölge planlama -mezun	ankara	Evet, kullanıyorum.	Evet, kullanıyorum.	ChatGPT, Grok	Hayır, kullanmıyorum.		Evet, kullanıyorum.	Elevenlabs, Suno, MMAudio	4	Çok sık kullanırım	Nadiren kullanırım	Nadiren kullanırım	Çok sık kullanırım	Nadiren kullanırım	Nadiren kullanırım	Nadiren kullanırım	Nadiren kullanırım	Nadiren kullanırım	Nadiren kullanırım	Nadiren kullanırım	Nadiren kullanırım	Bugün	1		Eğitim / Öğrenme, İş / Mesleki Amaçlar, Günlük İşler (takvim, e-posta, öneriler vs.), Eğlence	Çok yetkinim	Önemli	Kesinlikle katılıyorum	Kesinlikle katılıyorum	Kesinlikle katılıyorum	Kesinlikle katılıyorum	Kesinlikle katılıyorum	Kesinlikle katılıyorum	Kesinlikle katılıyorum	Kesinlikle katılıyorum	Kesinlikle katılıyorum	Kesinlikle katılıyorum	Kesinlikle katılıyorum	Kesinlikle katılıyorum	Kesinlikle katılıyorum	Kesinlikle katılıyorum	Kesinlikle katılıyorum	Kesinlikle katılıyorum	Kesinlikle katılıyorum	Kesinlikle katılıyorum
2025-05-26 19:33:40	Erkek	27	Lisans	Gıda teknolojisi	Ankara	Evet, kullanıyorum.	Evet, kullanıyorum.	ChatGPT	Hayır, kullanmıyorum.		Hayır, kullanmıyorum.		2	Sık kullanırım	Hiç kullanmam	Hiç kullanmam	Hiç kullanmam	Hiç kullanmam	Hiç kullanmam	Hiç kullanmam	Hiç kullanmam	Hiç kullanmam	Hiç kullanmam	Hiç kullanmam	Hiç kullanmam	Son 1 hafta içinde	1	0	İş / Mesleki Amaçlar	Orta düzeyde yetkinim	Orta düzeyde önemli	Katılıyorum	Kesinlikle katılıyorum	Katılıyorum	Kesinlikle katılıyorum	Katılıyorum	Katılıyorum	Katılıyorum	Katılıyorum	Hiç katılmıyorum	Kesinlikle katılıyorum	Kesinlikle katılıyorum	Kesinlikle katılıyorum	Kesinlikle katılıyorum	Kesinlikle katılıyorum	Kesinlikle katılıyorum	Kesinlikle katılıyorum	Kesinlikle katılıyorum	Kesinlikle katılıyorum
2025-05-26 19:40:47	Kadın	21	Lisans	bilgisayar mühendisliği 3	Ankara	Evet, kullanıyorum.	Evet, kullanıyorum.	ChatGPT, Gemini	Hayır, kullanmıyorum.		Evet, kullanıyorum.	Elevenlabs, MMAudio	4	Sık kullanırım	Ara sıra kullanırım	Nadiren kullanırım	Hiç kullanmam	Hiç kullanmam	Hiç kullanmam	Hiç kullanmam	Hiç kullanmam	Hiç kullanmam	Hiç kullanmam	Hiç kullanmam	Hiç kullanmam	Son 1 hafta içinde	1		Eğitim / Öğrenme, Günlük İşler (takvim, e-posta, öneriler vs.), Eğlence	Orta düzeyde yetkinim	Orta düzeyde önemli	Katılıyorum	Katılıyorum	Katılıyorum	Katılıyorum	Kesinlikle katılıyorum	Kesinlikle katılıyorum	Kesinlikle katılıyorum	Kesinlikle katılıyorum	Kesinlikle katılıyorum	Kesinlikle katılıyorum	Katılıyorum	Katılıyorum	Katılıyorum	Katılıyorum	Katılıyorum	Katılıyorum	Katılıyorum	Katılıyorum
2025-05-26 21:09:46	Kadın	44	Doktora		Konya	Evet, kullanıyorum.	Evet, kullanıyorum.	ChatGPT	Hayır, kullanmıyorum.		Hayır, kullanmıyorum.		4	Ara sıra kullanırım												Bugün	1		Eğitim / Öğrenme	Çok yetkinim	Önemli	Katılıyorum	Katılıyorum	Katılıyorum	Katılıyorum	Katılıyorum	Katılıyorum	Katılıyorum	Kesinlikle katılıyorum	Hiç katılmıyorum	Kesinlikle katılıyorum	Kesinlikle katılıyorum	Kesinlikle katılıyorum	Katılıyorum	Katılıyorum	Katılıyorum	Hiç katılmıyorum	Kararsızım	Katılıyorum
2025-05-26 21:11:35	Kadın	29	Lisans	Biyoteknoloji - 3. Sınıf	Konya	Evet, kullanıyorum.	Evet, kullanıyorum.	ChatGPT	Evet, kullanıyorum.	Midjourney, Dall-E	Evet, kullanıyorum.	Elevenlabs	5	Çok sık kullanırım	Ara sıra kullanırım	Ara sıra kullanırım	Hiç kullanmam	Hiç kullanmam	Nadiren kullanırım	Sık kullanırım	Ara sıra kullanırım	Hiç kullanmam	Hiç kullanmam	Hiç kullanmam	Hiç kullanmam	Bugün	5	40 USD	Eğitim / Öğrenme, İçerik Üretimi (metin, görsel, ses), İş / Mesleki Amaçlar, Günlük İşler (takvim, e-posta, öneriler vs.)	Orta düzeyde yetkinim	Önemli	Kesinlikle katılıyorum	Kararsızım	Katılıyorum	Kesinlikle katılıyorum	Katılıyorum	Kesinlikle katılıyorum	Kararsızım	Kararsızım	Kararsızım	Kararsızım	Kesinlikle katılıyorum	Kesinlikle katılıyorum	Kesinlikle katılıyorum	Kesinlikle katılıyorum	Kesinlikle katılıyorum	Kesinlikle katılıyorum	Katılıyorum	Kararsızım
2025-05-26 21:14:21	Kadın	30	Doktora	İmmünoloji - 5. Sınıf Doktora Tez Dönemi	Konya	Evet, kullanıyorum.	Evet, kullanıyorum.	ChatGPT, Gemini, Copilot	Hayır, kullanmıyorum.		Hayır, kullanmıyorum.		4	Sık kullanırım	Ara sıra kullanırım	Hiç kullanmam	Hiç kullanmam	Ara sıra kullanırım	Hiç kullanmam	Hiç kullanmam	Hiç kullanmam	Hiç kullanmam	Hiç kullanmam	Hiç kullanmam	Hiç kullanmam	Son 1 hafta içinde	1	-	Eğitim / Öğrenme, İçerik Üretimi (metin, görsel, ses), İş / Mesleki Amaçlar, Günlük İşler (takvim, e-posta, öneriler vs.), Eğlence	Biraz yetkinim	Önemli	Kararsızım	Kararsızım	Katılıyorum	Katılıyorum	Katılıyorum	Katılıyorum	Katılıyorum	Katılıyorum	Katılmıyorum	Kesinlikle katılıyorum	Kesinlikle katılıyorum	Kesinlikle katılıyorum	Katılıyorum	Kesinlikle katılıyorum	Katılıyorum	Kararsızım	Katılıyorum	Katılıyorum
2025-05-26 21:35:30	Erkek	25	Lisans	Makine Mühendisliği - 4.sınıf	Konya	Evet, kullanıyorum.	Evet, kullanıyorum.	ChatGPT, Gemini	Evet, kullanıyorum.	Midjourney, Dall-E, Leonardo.ai, Runway ML, Sora, Kling	Hayır, kullanmıyorum.		4	Sık kullanırım	Ara sıra kullanırım	Hiç kullanmam	Hiç kullanmam	Hiç kullanmam	Hiç kullanmam	Ara sıra kullanırım	Ara sıra kullanırım	Hiç kullanmam	Nadiren kullanırım	Ara sıra kullanırım	Ara sıra kullanırım	Bugün	3	30 USD	Eğitim / Öğrenme, İçerik Üretimi (metin, görsel, ses), İş / Mesleki Amaçlar, Günlük İşler (takvim, e-posta, öneriler vs.), Eğlence	Orta düzeyde yetkinim	Önemli	Kesinlikle katılıyorum	Kesinlikle katılıyorum	Kesinlikle katılıyorum	Kesinlikle katılıyorum	Kesinlikle katılıyorum	Kesinlikle katılıyorum	Kesinlikle katılıyorum	Katılmıyorum	Katılıyorum	Kararsızım	Kesinlikle katılıyorum	Kesinlikle katılıyorum	Kesinlikle katılıyorum	Kesinlikle katılıyorum	Kesinlikle katılıyorum	Kesinlikle katılıyorum	Kesinlikle katılıyorum	Kesinlikle katılıyorum
2025-05-26 21:54:37	Erkek	26	Yüksek Lisans	Moleküler biyoloji ve genetik - 2. Sınıf	Konya	Evet, kullanıyorum.	Evet, kullanıyorum.	ChatGPT, Gemini, DeepSeek, Grok	Evet, kullanıyorum.	Midjourney, Dall-E, Leonardo.ai, Sora	Evet, kullanıyorum.	Elevenlabs	5	Çok sık kullanırım	Çok sık kullanırım	Sık kullanırım	Ara sıra kullanırım	Hiç kullanmam	Hiç kullanmam	Sık kullanırım	Nadiren kullanırım	Hiç kullanmam	Hiç kullanmam	Ara sıra kullanırım	Hiç kullanmam	Bugün	3	20 USD.	Eğitim / Öğrenme, İçerik Üretimi (metin, görsel, ses), Günlük İşler (takvim, e-posta, öneriler vs.)	Yetkinim	Orta düzeyde önemli	Kesinlikle katılıyorum	Kararsızım	Katılıyorum	Kesinlikle katılıyorum	Kesinlikle katılıyorum	Kesinlikle katılıyorum	Kesinlikle katılıyorum	Kesinlikle katılıyorum	Hiç katılmıyorum	Kesinlikle katılıyorum	Katılıyorum	Katılıyorum	Katılıyorum	Katılıyorum	Kesinlikle katılıyorum	Kararsızım	Kararsızım	Katılıyorum
2025-05-26 22:06:16	Kadın	23	Lisans	Grafik Tasarım 4. Sınıf	KONYA	Evet, kullanıyorum.	Evet, kullanıyorum.	ChatGPT, Grok, Copilot	Evet, kullanıyorum.	Ideogram	Evet, kullanıyorum.	Elevenlabs	5	Sık kullanırım	Nadiren kullanırım		Nadiren kullanırım	Çok sık kullanırım								Bugün	1		Eğitim / Öğrenme, İçerik Üretimi (metin, görsel, ses), İş / Mesleki Amaçlar, Eğlence	Orta düzeyde yetkinim	Önemli	Katılıyorum	Katılıyorum	Katılıyorum	Katılıyorum	Kararsızım	Katılıyorum	Katılıyorum	Katılıyorum	Katılmıyorum	Kesinlikle katılıyorum	Katılıyorum	Katılıyorum	Katılıyorum	Katılıyorum	Kesinlikle katılıyorum	Kararsızım	Kararsızım	Kararsızım
2025-05-26 22:12:58	Kadın	33	Yüksek Lisans	Grafik yüksek lisans	Konya	Evet, kullanıyorum.	Evet, kullanıyorum.	ChatGPT	Hayır, kullanmıyorum.		Hayır, kullanmıyorum.		5	Çok sık kullanırım	Ara sıra kullanırım	Hiç kullanmam	Hiç kullanmam	Hiç kullanmam	Hiç kullanmam	Nadiren kullanırım	Hiç kullanmam	Hiç kullanmam	Hiç kullanmam	Hiç kullanmam	Hiç kullanmam	Bugün	3	20 usd	Eğitim / Öğrenme, İçerik Üretimi (metin, görsel, ses), İş / Mesleki Amaçlar, Günlük İşler (takvim, e-posta, öneriler vs.), Eğlence	Yetkinim	Önemli	Katılıyorum	Katılıyorum	Katılıyorum	Katılıyorum	Katılıyorum	Katılıyorum	Katılıyorum	Katılıyorum	Hiç katılmıyorum	Katılıyorum	Katılıyorum	Katılıyorum	Katılıyorum	Katılmıyorum	Katılıyorum	Kararsızım	Katılıyorum	Katılıyorum
2025-05-26 22:15:47	Kadın	25	Yüksek Lisans	Radyo Televizyon	Ankara	Evet, kullanıyorum.	Evet, kullanıyorum.	ChatGPT, Gemini	Hayır, kullanmıyorum.		Hayır, kullanmıyorum.		2	Nadiren kullanırım	Nadiren kullanırım	Hiç kullanmam	Hiç kullanmam	Hiç kullanmam	Hiç kullanmam	Hiç kullanmam	Hiç kullanmam	Hiç kullanmam	Hiç kullanmam	Hiç kullanmam	Hiç kullanmam	Son 1 ay içinde	1	Ödeme yapmıyorum	İçerik Üretimi (metin, görsel, ses), İş / Mesleki Amaçlar	Orta düzeyde yetkinim	Hiç önemli değil	Katılıyorum	Katılıyorum	Katılıyorum	Katılıyorum	Katılıyorum	Katılıyorum	Katılıyorum	Katılıyorum	Hiç katılmıyorum	Kararsızım	Hiç katılmıyorum	Katılıyorum	Kararsızım	Kararsızım	Kararsızım	Kararsızım	Kararsızım	Kararsızım
2025-05-26 22:32:15	Kadın	26	Yüksek Lisans	Radyo tv sinema anabilim dalı 2. Sınıf	Ankara	Evet, kullanıyorum.	Evet, kullanıyorum.	ChatGPT, DeepSeek	Evet, kullanıyorum.	Runway ML, Sora, Kling, ltx studio	Hayır, kullanmıyorum.		3	Çok sık kullanırım	Ara sıra kullanırım	Sık kullanırım	Hiç kullanmam	Hiç kullanmam	Hiç kullanmam	Nadiren kullanırım	Hiç kullanmam	Hiç kullanmam	Sık kullanırım	Sık kullanırım	Sık kullanırım	Bugün	3	50 USD	Eğitim / Öğrenme, İş / Mesleki Amaçlar	Çok yetkinim	Orta düzeyde önemli	Kesinlikle katılıyorum	Kesinlikle katılıyorum	Kesinlikle katılıyorum	Katılıyorum	Kesinlikle katılıyorum	Kesinlikle katılıyorum	Kesinlikle katılıyorum	Katılıyorum	Kararsızım	Katılıyorum	Kararsızım	Kararsızım	Katılmıyorum	Katılmıyorum	Kararsızım	Katılmıyorum	Katılıyorum	Kararsızım
2025-05-26 23:04:23	Kadın	30	Lisans			Evet, kullanıyorum.	Evet, kullanıyorum.	ChatGPT	Hayır, kullanmıyorum.		Hayır, kullanmıyorum.		4	Çok sık kullanırım	Nadiren kullanırım	Hiç kullanmam	Hiç kullanmam	Hiç kullanmam	Hiç kullanmam	Hiç kullanmam	Hiç kullanmam	Hiç kullanmam	Hiç kullanmam	Hiç kullanmam	Hiç kullanmam	Bugün	1		Eğitim / Öğrenme, İçerik Üretimi (metin, görsel, ses), Günlük İşler (takvim, e-posta, öneriler vs.)	Orta düzeyde yetkinim	Önemli	Katılıyorum	Kararsızım	Kesinlikle katılıyorum	Kesinlikle katılıyorum	Kararsızım	Katılıyorum	Kesinlikle katılıyorum	Katılıyorum	Katılıyorum	Katılmıyorum	Kesinlikle katılıyorum	Kesinlikle katılıyorum	Katılıyorum	Kararsızım	Kesinlikle katılıyorum	Katılıyorum	Katılıyorum	Katılıyorum
2025-05-26 23:20:40	Kadın	35	Lisans		Konya	Evet, kullanıyorum.	Evet, kullanıyorum.	ChatGPT	Hayır, kullanmıyorum.		Hayır, kullanmıyorum.		2	Ara sıra kullanırım	Hiç kullanmam	Hiç kullanmam	Hiç kullanmam	Hiç kullanmam	Hiç kullanmam	Hiç kullanmam	Hiç kullanmam	Hiç kullanmam	Hiç kullanmam	Hiç kullanmam	Hiç kullanmam	Son 1 hafta içinde	1		Eğitim / Öğrenme, İş / Mesleki Amaçlar, Günlük İşler (takvim, e-posta, öneriler vs.)	Biraz yetkinim	Hiç önemli değil	Katılıyorum	Katılıyorum	Katılıyorum	Katılıyorum	Katılıyorum	Katılıyorum	Katılıyorum	Katılıyorum	Katılıyorum	Katılıyorum	Katılıyorum	Katılıyorum	Katılıyorum	Katılıyorum	Katılıyorum	Katılıyorum	Katılıyorum	Katılıyorum
2025-05-26 23:29:08	Erkek	27	Lisans			Evet, kullanıyorum.	Evet, kullanıyorum.	ChatGPT, Gemini, Copilot	Evet, kullanıyorum.	Runway ML, Sora, Kling	Evet, kullanıyorum.	Elevenlabs	4	Çok sık kullanırım	Nadiren kullanırım	Nadiren kullanırım	Nadiren kullanırım	Nadiren kullanırım	Hiç kullanmam	Hiç kullanmam	Hiç kullanmam	Hiç kullanmam	Nadiren kullanırım	Ara sıra kullanırım	Nadiren kullanırım	Bugün	1	0	Eğitim / Öğrenme, İçerik Üretimi (metin, görsel, ses), İş / Mesleki Amaçlar, Günlük İşler (takvim, e-posta, öneriler vs.), Eğlence	Yetkinim	Önemli	Katılıyorum	Kararsızım	Katılıyorum	Katılıyorum	Katılıyorum	Katılıyorum	Katılıyorum	Katılmıyorum	Katılıyorum	Katılmıyorum	Katılıyorum	Kesinlikle katılıyorum	Kesinlikle katılıyorum	Katılıyorum	Katılıyorum	Kesinlikle katılıyorum	Katılıyorum	Kararsızım
2025-05-26 23:36:59	Erkek	30	Yüksek Lisans	Radyo Televizyon ve Sinema 2.sınıf (yüksek lisans)	Kayseri	Evet, kullanıyorum.	Evet, kullanıyorum.	ChatGPT, Gemini, DeepSeek, Grok	Evet, kullanıyorum.	Midjourney, Runway ML, Sora	Evet, kullanıyorum.	Elevenlabs	4	Sık kullanırım	Ara sıra kullanırım	Ara sıra kullanırım	Ara sıra kullanırım	Nadiren kullanırım	Nadiren kullanırım	Ara sıra kullanırım	Ara sıra kullanırım	Ara sıra kullanırım	Ara sıra kullanırım	Ara sıra kullanırım	Ara sıra kullanırım	Bugün	1	0	Eğitim / Öğrenme, İçerik Üretimi (metin, görsel, ses), İş / Mesleki Amaçlar	Biraz yetkinim	Önemli	Katılıyorum	Katılıyorum	Katılıyorum	Katılıyorum	Katılıyorum	Katılıyorum	Katılıyorum	Katılıyorum	Katılmıyorum	Katılıyorum	Katılıyorum	Katılıyorum	Katılıyorum	Katılıyorum	Katılıyorum	Katılıyorum	Katılıyorum	Katılıyorum
2025-05-27 00:15:36	Kadın	21	Lisans	Spor yönetimi 2. Sınıf	Ankara	Evet, kullanıyorum.	Evet, kullanıyorum.	ChatGPT	Hayır, kullanmıyorum.		Hayır, kullanmıyorum.		3	Çok sık kullanırım	Hiç kullanmam	Hiç kullanmam	Hiç kullanmam	Hiç kullanmam	Hiç kullanmam	Hiç kullanmam	Hiç kullanmam	Hiç kullanmam	Hiç kullanmam	Hiç kullanmam	Hiç kullanmam	Bugün	3	0 tl	Eğitim / Öğrenme, Eğlence	Yetkinim	Vazgeçilmez	Katılıyorum	Katılıyorum	Katılıyorum	Katılıyorum	Katılıyorum	Katılıyorum	Katılıyorum	Katılıyorum	Katılıyorum	Katılıyorum	Kesinlikle katılıyorum	Kesinlikle katılıyorum	Kesinlikle katılıyorum	Kesinlikle katılıyorum	Kesinlikle katılıyorum	Kesinlikle katılıyorum	Kesinlikle katılıyorum	Kesinlikle katılıyorum
2025-05-27 00:33:35	Erkek	24	Lisans	Rekreasyon- 4. Sınıf	Ankara	Evet, kullanıyorum.	Evet, kullanıyorum.	Gemini	Hayır, kullanmıyorum.		Hayır, kullanmıyorum.		5	Çok sık kullanırım	Hiç kullanmam	Hiç kullanmam	Ara sıra kullanırım	Ara sıra kullanırım	Hiç kullanmam	Hiç kullanmam	Hiç kullanmam	Hiç kullanmam	Hiç kullanmam	Hiç kullanmam	Hiç kullanmam	Bugün	1	0	Eğitim / Öğrenme, İçerik Üretimi (metin, görsel, ses)	Biraz yetkinim	Orta düzeyde önemli	Kesinlikle katılıyorum	Kesinlikle katılıyorum	Kararsızım	Kesinlikle katılıyorum	Kararsızım	Katılıyorum	Kararsızım	Katılıyorum	Katılıyorum	Katılıyorum	Kesinlikle katılıyorum	Kesinlikle katılıyorum	Kesinlikle katılıyorum	Kesinlikle katılıyorum	Kesinlikle katılıyorum	Kesinlikle katılıyorum	Kesinlikle katılıyorum	Kesinlikle katılıyorum
2025-05-27 00:43:37	Kadın	26	Yüksek Lisans	Odyoloji	Ankara	Evet, kullanıyorum.	Evet, kullanıyorum.	ChatGPT	Evet, kullanıyorum.	Midjourney, Dall-E	Hayır, kullanmıyorum.		4	Sık kullanırım	Hiç kullanmam	Hiç kullanmam	Hiç kullanmam	Hiç kullanmam	Hiç kullanmam	Nadiren kullanırım	Nadiren kullanırım	Hiç kullanmam	Hiç kullanmam	Hiç kullanmam	Hiç kullanmam	Son 1 hafta içinde	1	ücretsiz sürüm olarak kullanıyorum	Eğitim / Öğrenme, İçerik Üretimi (metin, görsel, ses), İş / Mesleki Amaçlar	Biraz yetkinim	Orta düzeyde önemli	Katılıyorum	Katılıyorum	Katılıyorum	Kesinlikle katılıyorum	Kararsızım	Katılıyorum	Kararsızım	Kararsızım	Kararsızım	Katılıyorum	Katılıyorum	Katılıyorum	Katılıyorum	Kararsızım	Kesinlikle katılıyorum	Katılıyorum	Katılıyorum	Kesinlikle katılıyorum
2025-05-27 08:04:10	Kadın	26	Lisans		Ankara	Hayır, kullanmıyorum.
2025-05-27 09:19:56	Kadın	31	Lisans		Konya	Evet, kullanıyorum.	Evet, kullanıyorum.	ChatGPT, DeepSeek, Grok	Evet, kullanıyorum.	Midjourney, Leonardo.ai, Runway ML,	Evet, kullanıyorum.	Elevenlabs, MMAudio	3	Ara sıra kullanırım	Nadiren kullanırım	Ara sıra kullanırım	Ara sıra kullanırım	Nadiren kullanırım		Nadiren kullanırım	Hiç kullanmam	Hiç kullanmam	Nadiren kullanırım	Hiç kullanmam	Ara sıra kullanırım	Bugün	5	15 -70 USD	İçerik Üretimi (metin, görsel, ses), Eğlence	Orta düzeyde yetkinim	Orta düzeyde önemli	Katılmıyorum	Katılıyorum	Kesinlikle katılıyorum	Kesinlikle katılıyorum	Kesinlikle katılıyorum	Katılıyorum	Katılıyorum	Kararsızım	Katılıyorum	Kesinlikle katılıyorum	Katılıyorum	Kesinlikle katılıyorum	Kesinlikle katılıyorum	Kararsızım	Kesinlikle katılıyorum	Kararsızım	Kesinlikle katılıyorum	Kesinlikle katılıyorum
2025-05-27 09:44:42	Kadın	25	Yüksek Lisans	Gıda mühendisliği- Yl 3. sınıf	İstanbul	Evet, kullanıyorum.	Evet, kullanıyorum.	ChatGPT, Gemini, DeepSeek	Hayır, kullanmıyorum.		Hayır, kullanmıyorum.		5	Ara sıra kullanırım	Ara sıra kullanırım	Hiç kullanmam		Hiç kullanmam	Hiç kullanmam	Hiç kullanmam	Hiç kullanmam	Hiç kullanmam	Hiç kullanmam	Hiç kullanmam	Hiç kullanmam	Bugün	1	0	Eğitim / Öğrenme, İçerik Üretimi (metin, görsel, ses), İş / Mesleki Amaçlar, Günlük İşler (takvim, e-posta, öneriler vs.)	Orta düzeyde yetkinim	Önemli	Katılıyorum	Hiç katılmıyorum	Kesinlikle katılıyorum	Kesinlikle katılıyorum	Katılmıyorum	Kararsızım	Kesinlikle katılıyorum	Kararsızım	Katılıyorum	Katılmıyorum	Kesinlikle katılıyorum	Kesinlikle katılıyorum	Katılıyorum	Katılmıyorum	Kesinlikle katılıyorum	Kesinlikle katılıyorum	Kesinlikle katılıyorum	Kesinlikle katılıyorum
2025-05-27 09:49:35	Kadın	22	Lisans	rekreasyon 4	konya	Hayır, kullanmıyorum.
2025-05-27 09:56:21	Kadın	23	Lisans	Tarih-Mezun	Konya	Evet, kullanıyorum.	Evet, kullanıyorum.	ChatGPT	Hayır, kullanmıyorum.		Hayır, kullanmıyorum.		2	Ara sıra kullanırım	Hiç kullanmam	Hiç kullanmam	Hiç kullanmam	Hiç kullanmam	Hiç kullanmam	Hiç kullanmam	Hiç kullanmam	Hiç kullanmam	Hiç kullanmam	Hiç kullanmam	Hiç kullanmam	Son 1 hafta içinde	1	-	Eğlence	Orta düzeyde yetkinim	Pek önemli değil	Katılıyorum	Katılıyorum	Kararsızım	Katılıyorum	Katılıyorum	Katılıyorum	Katılıyorum	Katılıyorum	Katılıyorum	Katılıyorum	Katılıyorum	Katılıyorum	Katılıyorum	Katılıyorum	Kararsızım	Kararsızım	Katılıyorum	Katılıyorum
2025-05-27 10:25:44	Erkek	37	Lisans	İŞLETME	KONYA	Evet, kullanıyorum.	Evet, kullanıyorum.	ChatGPT	Hayır, kullanmıyorum.		Hayır, kullanmıyorum.		3	Sık kullanırım	Hiç kullanmam	Hiç kullanmam	Hiç kullanmam	Hiç kullanmam	Hiç kullanmam	Hiç kullanmam	Hiç kullanmam	Hiç kullanmam	Hiç kullanmam	Hiç kullanmam	Hiç kullanmam	Son 1 hafta içinde	1	ÜCRETSİZ KISMINI KULLANIYORUM	İş / Mesleki Amaçlar	Orta düzeyde yetkinim	Pek önemli değil	Kararsızım	Kararsızım	Hiç katılmıyorum	Katılıyorum	Katılıyorum	Katılıyorum	Katılıyorum	Katılıyorum	Katılıyorum	Katılıyorum	Katılıyorum	Katılıyorum	Katılıyorum	Katılıyorum	Kesinlikle katılıyorum	Kararsızım	Katılıyorum	Katılıyorum
2025-05-27 11:29:57	Erkek	27	Lisans	Radyo Televizyon ve Sinema	Ankara	Evet, kullanıyorum.	Evet, kullanıyorum.	ChatGPT	Hayır, kullanmıyorum.		Hayır, kullanmıyorum.		1	Ara sıra kullanırım	Hiç kullanmam	Hiç kullanmam	Hiç kullanmam	Hiç kullanmam	Hiç kullanmam	Hiç kullanmam	Hiç kullanmam	Hiç kullanmam	Hiç kullanmam	Hiç kullanmam	Hiç kullanmam	Son 1 hafta içinde	1	500 Tl	Eğitim / Öğrenme	Orta düzeyde yetkinim	Orta düzeyde önemli	Katılıyorum	Kararsızım	Kararsızım	Katılmıyorum	Katılmıyorum	Katılmıyorum	Kararsızım	Kararsızım	Kararsızım	Katılmıyorum	Katılıyorum	Katılıyorum	Katılıyorum	Kararsızım	Katılıyorum	Kararsızım	Katılıyorum	Katılıyorum
2025-05-27 11:49:46	Kadın	27	Lisans	Radyo, televizyon ve sinema-mezun	Eskişehir	Evet, kullanıyorum.	Evet, kullanıyorum.	ChatGPT, Gemini	Hayır, kullanmıyorum.		Hayır, kullanmıyorum.		3	Sık kullanırım	Sık kullanırım	Nadiren kullanırım	Hiç kullanmam	Hiç kullanmam	Hiç kullanmam	Hiç kullanmam	Hiç kullanmam	Hiç kullanmam	Hiç kullanmam	Hiç kullanmam	Hiç kullanmam	Son 1 hafta içinde	1		Eğitim / Öğrenme, İçerik Üretimi (metin, görsel, ses), İş / Mesleki Amaçlar, Günlük İşler (takvim, e-posta, öneriler vs.), Eğlence	Yetkinim	Orta düzeyde önemli	Katılıyorum	Katılıyorum	Katılıyorum	Katılıyorum	Katılıyorum	Katılıyorum	Katılıyorum	Katılıyorum	Katılmıyorum	Katılıyorum	Katılıyorum	Katılıyorum	Kararsızım	Katılıyorum	Katılıyorum	Kararsızım	Kararsızım	Kararsızım
2025-05-27 11:54:57	Erkek	32	Lisans	Çevre mühendisliği	Konya	Hayır, kullanmıyorum.
2025-05-27 13:35:16	Kadın	55	Lisans	Eğitim fak.	Antalya	Hayır, kullanmıyorum.
2025-05-27 13:48:58	Kadın	21	Lisans	Grafik 3.sınıf	Konya	Evet, kullanıyorum.	Evet, kullanıyorum.	ChatGPT, Copilot	Evet, kullanıyorum.	Dall-E, Leonardo.ai,	Hayır, kullanmıyorum.		4	Ara sıra kullanırım	Hiç kullanmam	Nadiren kullanırım	Hiç kullanmam	Ara sıra kullanırım	Hiç kullanmam	Nadiren kullanırım	Nadiren kullanırım	Hiç kullanmam	Hiç kullanmam	Hiç kullanmam	Hiç kullanmam	Son 1 hafta içinde	1		İş / Mesleki Amaçlar, Eğlence	Orta düzeyde yetkinim	Önemli	Katılıyorum	Katılıyorum	Katılıyorum	Katılıyorum	Katılıyorum	Katılıyorum	Katılıyorum	Katılıyorum	Hiç katılmıyorum	Kesinlikle katılıyorum	Katılıyorum	Katılıyorum	Katılıyorum	Kararsızım	Katılıyorum	Kararsızım	Katılıyorum	Katılıyorum
2025-05-27 14:09:00	Kadın	26	Lisans	Mezun	Konya	Evet, kullanıyorum.	Evet, kullanıyorum.	ChatGPT, Gemini	Hayır, kullanmıyorum.		Hayır, kullanmıyorum.		3	Sık kullanırım	Sık kullanırım											Bugün	1	Ödemiyorum	Eğitim / Öğrenme, İçerik Üretimi (metin, görsel, ses), İş / Mesleki Amaçlar, Günlük İşler (takvim, e-posta, öneriler vs.)	Biraz yetkinim	Orta düzeyde önemli	Katılıyorum	Katılıyorum	Katılıyorum	Katılıyorum	Katılıyorum	Katılıyorum	Kesinlikle katılıyorum	Katılıyorum	Kararsızım	Kararsızım	Katılıyorum	Katılıyorum	Kararsızım	Katılıyorum	Katılıyorum	Kararsızım	Katılıyorum	Kararsızım
2025-05-27 14:22:01	Kadın	45	Lisans	Grafik yüksek lisan 2. Sınıf	Konya	Evet, kullanıyorum.	Evet, kullanıyorum.	ChatGPT, Gemini, Copilot	Hayır, kullanmıyorum.		Hayır, kullanmıyorum.		3	Sık kullanırım	Sık kullanırım	Nadiren kullanırım	Hiç kullanmam	Sık kullanırım	Hiç kullanmam	Nadiren kullanırım	Hiç kullanmam	Hiç kullanmam	Hiç kullanmam	Hiç kullanmam	Hiç kullanmam	Son 1 hafta içinde	1	Ücretsiz kısımından yararlanıyorum	Eğitim / Öğrenme, İçerik Üretimi (metin, görsel, ses)	Orta düzeyde yetkinim	Orta düzeyde önemli	Katılıyorum	Katılıyorum	Kararsızım	Katılıyorum	Kararsızım	Kararsızım	Kararsızım	Katılıyorum	Katılıyorum	Katılıyorum	Katılıyorum	Katılıyorum	Katılıyorum	Katılıyorum	Katılıyorum	Kararsızım	Katılıyorum	Kararsızım
2025-05-27 14:31:04	Kadın	21	Lisans	Diyetisyenlik 2. Sınıf	Konya	Evet, kullanıyorum.	Evet, kullanıyorum.	ChatGPT, Gemini	Hayır, kullanmıyorum.		Hayır, kullanmıyorum.		5	Çok sık kullanırım	Sık kullanırım	Nadiren kullanırım	Nadiren kullanırım	Ara sıra kullanırım	Nadiren kullanırım	Nadiren kullanırım	Nadiren kullanırım	Hiç kullanmam	Hiç kullanmam	Hiç kullanmam	Hiç kullanmam	Bugün	1	Ücretli kullanmadım	Eğitim / Öğrenme, İş / Mesleki Amaçlar, Günlük İşler (takvim, e-posta, öneriler vs.), Eğlence	Biraz yetkinim	Orta düzeyde önemli	Katılıyorum	Kararsızım	Katılıyorum	Katılıyorum	Kararsızım	Katılıyorum	Katılıyorum	Kararsızım	Katılmıyorum	Katılıyorum	Katılıyorum	Katılıyorum	Katılıyorum	Katılıyorum	Katılıyorum	Kararsızım	Katılıyorum	Kararsızım
2025-05-27 14:33:20	Kadın	31	Lisans	Tarih öğretmeni- mezun	Konya	Evet, kullanıyorum.	Evet, kullanıyorum.	ChatGPT	Hayır, kullanmıyorum.		Hayır, kullanmıyorum.		5	Çok sık kullanırım	Hiç kullanmam	Hiç kullanmam	Hiç kullanmam	Hiç kullanmam	Hiç kullanmam	Hiç kullanmam	Hiç kullanmam	Hiç kullanmam	Hiç kullanmam	Hiç kullanmam	Hiç kullanmam	Son 1 hafta içinde	1	Hiç	İçerik Üretimi (metin, görsel, ses), Günlük İşler (takvim, e-posta, öneriler vs.), Eğlence	Biraz yetkinim	Orta düzeyde önemli	Hiç katılmıyorum	Hiç katılmıyorum	Katılmıyorum	Katılmıyorum	Katılmıyorum	Katılmıyorum	Katılmıyorum	Katılmıyorum	Hiç katılmıyorum	Katılmıyorum	Katılmıyorum	Katılmıyorum	Katılmıyorum	Katılmıyorum	Katılmıyorum	Hiç katılmıyorum	Katılmıyorum	Katılmıyorum
2025-05-27 14:33:27	Kadın	60	Doktora	İngilizce	İstanbul	Hayır, kullanmıyorum.
2025-05-27 14:38:05	Kadın	24	Yüksek Lisans	Grafik Tasarım- yüksek 2	Konya	Evet, kullanıyorum.	Evet, kullanıyorum.	ChatGPT	Hayır, kullanmıyorum.		Hayır, kullanmıyorum.		2	Ara sıra kullanırım	Hiç kullanmam	Hiç kullanmam	Hiç kullanmam	Hiç kullanmam	Hiç kullanmam	Hiç kullanmam	Hiç kullanmam	Hiç kullanmam	Hiç kullanmam	Hiç kullanmam	Hiç kullanmam	Son 1 hafta içinde	1	0	Eğitim / Öğrenme, İçerik Üretimi (metin, görsel, ses), İş / Mesleki Amaçlar, Günlük İşler (takvim, e-posta, öneriler vs.), Eğlence	Biraz yetkinim	Orta düzeyde önemli	Kararsızım	Kesinlikle katılıyorum	Katılıyorum	Katılıyorum	Katılıyorum	Katılıyorum	Katılıyorum	Katılıyorum	Kararsızım	Kararsızım	Katılıyorum	Katılıyorum	Katılıyorum	Katılıyorum	Katılıyorum	Kararsızım	Katılıyorum	Katılıyorum
2025-05-27 15:21:52	Kadın	25	Lisans	Bankacılık ve sigortacılık	Konya	Evet, kullanıyorum.	Evet, kullanıyorum.	ChatGPT, Gemini, DeepSeek	Hayır, kullanmıyorum.		Evet, kullanıyorum.	Elevenlabs	2	Ara sıra kullanırım		Ara sıra kullanırım	Nadiren kullanırım	Ara sıra kullanırım	Ara sıra kullanırım			Sık kullanırım	Çok sık kullanırım		Sık kullanırım	Son 1 hafta içinde	1	300 tl	İçerik Üretimi (metin, görsel, ses)	Orta düzeyde yetkinim	Orta düzeyde önemli	Kararsızım	Kararsızım	Kararsızım	Kararsızım	Kararsızım	Kararsızım	Kararsızım	Katılmıyorum	Kararsızım	Kararsızım	Kararsızım	Kararsızım	Kararsızım	Kararsızım	Kararsızım	Kararsızım	Kesinlikle katılıyorum	Katılmıyorum
2025-05-27 15:50:50	Kadın	43	Lisans			Evet, kullanıyorum.	Evet, kullanıyorum.	ChatGPT, Gemini, Grok	Hayır, kullanmıyorum.		Hayır, kullanmıyorum.		2	Ara sıra kullanırım	Nadiren kullanırım		Nadiren kullanırım									Son 1 hafta içinde	1		İş / Mesleki Amaçlar	Hiç yetkin hissetmiyorum	Pek önemli değil	Hiç katılmıyorum	Hiç katılmıyorum	Hiç katılmıyorum	Katılmıyorum	Katılmıyorum	Katılmıyorum	Katılmıyorum	Kesinlikle katılıyorum	Kesinlikle katılıyorum	Katılmıyorum	Kararsızım	Kararsızım	Kararsızım	Katılıyorum	Katılıyorum	Kararsızım	Katılıyorum	Katılıyorum
2025-05-27 17:23:54	Kadın	26	Yüksek Lisans	Grafik	Konya	Evet, kullanıyorum.	Hayır, kullanmıyorum.		Hayır, kullanmıyorum.		Hayır, kullanmıyorum.		1	Ara sıra kullanırım												Son 1 hafta içinde	1	0	Eğitim / Öğrenme	Hiç yetkin hissetmiyorum	Hiç önemli değil	Hiç katılmıyorum	Hiç katılmıyorum	Hiç katılmıyorum	Hiç katılmıyorum	Hiç katılmıyorum	Hiç katılmıyorum	Hiç katılmıyorum	Hiç katılmıyorum	Hiç katılmıyorum	Hiç katılmıyorum	Hiç katılmıyorum	Hiç katılmıyorum	Hiç katılmıyorum	Hiç katılmıyorum	Hiç katılmıyorum	Hiç katılmıyorum	Hiç katılmıyorum	Hiç katılmıyorum
2025-05-27 17:39:23	Kadın	24	Lisans		Konya	Hayır, kullanmıyorum.
2025-05-27 23:13:10	Erkek	28	Lisans			Evet, kullanıyorum.	Evet, kullanıyorum.	ChatGPT, DeepSeek	Hayır, kullanmıyorum.		Hayır, kullanmıyorum.		4	Sık kullanırım	Hiç kullanmam	Nadiren kullanırım	Hiç kullanmam	Hiç kullanmam	Hiç kullanmam	Hiç kullanmam	Hiç kullanmam	Hiç kullanmam	Hiç kullanmam	Hiç kullanmam	Hiç kullanmam	Bugün	5	700 TL	Eğitim / Öğrenme, İçerik Üretimi (metin, görsel, ses), İş / Mesleki Amaçlar, Günlük İşler (takvim, e-posta, öneriler vs.)	Orta düzeyde yetkinim	Önemli	Kararsızım	Kararsızım	Katılıyorum	Katılıyorum	Katılıyorum	Katılıyorum	Kararsızım	Katılıyorum	Katılmıyorum	Kararsızım	Katılıyorum	Katılıyorum	Katılıyorum	Katılıyorum	Katılıyorum	Kararsızım	Katılıyorum	Katılıyorum
2025-05-28 08:41:20	Kadın	40	Lisans	grafik tasarım	denizli	Evet, kullanıyorum.	Evet, kullanıyorum.	ChatGPT	Hayır, kullanmıyorum.		Hayır, kullanmıyorum.		2	Ara sıra kullanırım												Son 1 hafta içinde	1	0	Eğitim / Öğrenme, İçerik Üretimi (metin, görsel, ses), gezi planı	Biraz yetkinim	Orta düzeyde önemli	Hiç katılmıyorum	Katılmıyorum	Katılmıyorum	Hiç katılmıyorum	Hiç katılmıyorum	Hiç katılmıyorum	Hiç katılmıyorum	Hiç katılmıyorum	Katılmıyorum	Hiç katılmıyorum	Katılmıyorum	Hiç katılmıyorum	Katılmıyorum	Hiç katılmıyorum	Hiç katılmıyorum	Katılmıyorum	Hiç katılmıyorum	Hiç katılmıyorum
2025-05-28 08:54:44	Kadın	29	Yüksek Lisans	Uluslararası Ticaret ve Finans- Mezun	Denizli	Evet, kullanıyorum.	Evet, kullanıyorum.	ChatGPT, Gemini, Grok, Copilot	Hayır, kullanmıyorum.		Hayır, kullanmıyorum.		3	Çok sık kullanırım	Çok sık kullanırım	Hiç kullanmam	Sık kullanırım	Nadiren kullanırım	Hiç kullanmam	Nadiren kullanırım	Hiç kullanmam	Hiç kullanmam	Hiç kullanmam	Hiç kullanmam	Hiç kullanmam	Son 1 hafta içinde	2	400	Eğitim / Öğrenme, İçerik Üretimi (metin, görsel, ses), İş / Mesleki Amaçlar, Eğlence	Biraz yetkinim	Pek önemli değil	Katılıyorum	Kararsızım	Katılıyorum	Katılıyorum	Katılıyorum	Katılmıyorum	Kararsızım	Kararsızım	Katılmıyorum	Kararsızım	Katılıyorum	Katılıyorum	Katılıyorum	Kesinlikle katılıyorum	Katılıyorum	Katılıyorum	Kesinlikle katılıyorum	Kesinlikle katılıyorum
2025-05-28 09:16:04	Erkek	18	Lisans	Grafik Tasarım 2.Sınıf	DENİZLİ	Evet, kullanıyorum.	Evet, kullanıyorum.	ChatGPT, DeepSeek, Copilot, MIDJOURNEY , Ideogram , Adobe Fire Fly Vb.	Evet, kullanıyorum.	Midjourney, Dall-E, Leonardo.ai, Sora, Kling, Ideogram . Şıklara koymamışsınız ayıp etmişsiniz .	Hayır, kullanmıyorum.		5	Ara sıra kullanırım	Hiç kullanmam	Ara sıra kullanırım	Nadiren kullanırım	Ara sıra kullanırım	Nadiren kullanırım	Ara sıra kullanırım	Ara sıra kullanırım	Hiç kullanmam	Ara sıra kullanırım	Ara sıra kullanırım	Hiç kullanmam	Bugün	3	15 usd	Eğitim / Öğrenme, İçerik Üretimi (metin, görsel, ses), İş / Mesleki Amaçlar, Günlük İşler (takvim, e-posta, öneriler vs.), Eğlence	Çok yetkinim	Vazgeçilmez	Kesinlikle katılıyorum	Kesinlikle katılıyorum	Kesinlikle katılıyorum	Kesinlikle katılıyorum	Kesinlikle katılıyorum	Kesinlikle katılıyorum	Kesinlikle katılıyorum	Katılmıyorum	Kararsızım	Hiç katılmıyorum	Kesinlikle katılıyorum	Kesinlikle katılıyorum	Kesinlikle katılıyorum	Kesinlikle katılıyorum	Kesinlikle katılıyorum	Katılıyorum	Kesinlikle katılıyorum	Kesinlikle katılıyorum
2025-05-28 09:20:20	Kadın	18	Lisans	Grafik tasarım 1. Sınıf	Mardin	Evet, kullanıyorum.	Evet, kullanıyorum.	ChatGPT	Hayır, kullanmıyorum.		Evet, kullanıyorum.	Suno	5	Çok sık kullanırım	Ara sıra kullanırım	Sık kullanırım	Hiç kullanmam	Ara sıra kullanırım	Hiç kullanmam	Hiç kullanmam	Hiç kullanmam	Hiç kullanmam	Hiç kullanmam	Ara sıra kullanırım	Hiç kullanmam	Bugün	1	150 TL	Eğitim / Öğrenme, İçerik Üretimi (metin, görsel, ses), İş / Mesleki Amaçlar	Yetkinim	Önemli	Kararsızım	Katılıyorum	Katılıyorum	Kesinlikle katılıyorum	Kesinlikle katılıyorum	Kesinlikle katılıyorum	Kesinlikle katılıyorum	Kesinlikle katılıyorum	Hiç katılmıyorum	Kesinlikle katılıyorum	Kesinlikle katılıyorum	Kesinlikle katılıyorum	Katılıyorum	Kararsızım	Kesinlikle katılıyorum	Kararsızım	Katılıyorum	Katılıyorum
2025-05-28 10:05:14	Kadın	19	Lisans	Grafik Tasarımı 1. Sınıf	Denizli	Evet, kullanıyorum.	Evet, kullanıyorum.	ChatGPT	Hayır, kullanmıyorum.		Hayır, kullanmıyorum.		4	Sık kullanırım	Hiç kullanmam	Hiç kullanmam	Hiç kullanmam	Hiç kullanmam	Hiç kullanmam	Hiç kullanmam	Hiç kullanmam	Hiç kullanmam	Hiç kullanmam	Hiç kullanmam	Hiç kullanmam	Son 1 hafta içinde	1	Ödemiyorum	İçerik Üretimi (metin, görsel, ses)	Yetkinim	Orta düzeyde önemli	Katılıyorum	Katılmıyorum	Kararsızım	Katılıyorum	Katılmıyorum	Katılıyorum	Katılmıyorum	Katılıyorum	Hiç katılmıyorum	Katılıyorum	Katılıyorum	Katılıyorum	Katılıyorum	Katılıyorum	Katılıyorum	Katılmıyorum	Katılıyorum	Katılıyorum
2025-05-28 11:13:44	Kadın	18	Lisans	Grafik tasarım 1. Sınıf	İzmir	Evet, kullanıyorum.	Evet, kullanıyorum.	ChatGPT, Gemini, DeepSeek	Evet, kullanıyorum.	Midjourney	Hayır, kullanmıyorum.		3	Çok sık kullanırım	Sık kullanırım	Sık kullanırım	Hiç kullanmam	Hiç kullanmam	Hiç kullanmam	Ara sıra kullanırım	Hiç kullanmam	Hiç kullanmam	Hiç kullanmam	Hiç kullanmam	Hiç kullanmam	Son 1 hafta içinde	1	0tl	Eğitim / Öğrenme, İçerik Üretimi (metin, görsel, ses)	Orta düzeyde yetkinim	Önemli	Katılıyorum	Kararsızım	Katılıyorum	Kesinlikle katılıyorum	Katılıyorum	Katılıyorum	Katılıyorum	Katılıyorum	Kararsızım	Katılıyorum	Kararsızım	Katılıyorum	Katılıyorum	Katılıyorum	Kesinlikle katılıyorum	Kararsızım	Katılıyorum	Kararsızım
2025-05-28 11:16:14	Kadın	29	Doktora	Felsefe ve Din Bilimleri- 1.sınıf	Denizli	Evet, kullanıyorum.	Evet, kullanıyorum.	ChatGPT, DeepSeek	Evet, kullanıyorum.	Sora	Hayır, kullanmıyorum.		5	Çok sık kullanırım	Nadiren kullanırım	Sık kullanırım	Hiç kullanmam	Ara sıra kullanırım	Hiç kullanmam	Hiç kullanmam	Hiç kullanmam	Hiç kullanmam	Hiç kullanmam	Sık kullanırım	Hiç kullanmam	Son 1 hafta içinde	1	0	Eğitim / Öğrenme	Orta düzeyde yetkinim	Önemli	Katılmıyorum	Hiç katılmıyorum	Kesinlikle katılıyorum	Katılıyorum	Kararsızım	Kesinlikle katılıyorum	Katılıyorum	Katılıyorum	Hiç katılmıyorum	Katılmıyorum	Kesinlikle katılıyorum	Kesinlikle katılıyorum	Kesinlikle katılıyorum	Kesinlikle katılıyorum	Kesinlikle katılıyorum	Kesinlikle katılıyorum	Kesinlikle katılıyorum	Kesinlikle katılıyorum
2025-05-28 11:40:27	Erkek	19	Lisans	Grafik Tasarım	Denizli	Evet, kullanıyorum.	Evet, kullanıyorum.	ChatGPT, Grok, Copilot	Hayır, kullanmıyorum.		Evet, kullanıyorum.	Elevenlabs	3	Sık kullanırım	Hiç kullanmam	Hiç kullanmam	Ara sıra kullanırım	Ara sıra kullanırım	Hiç kullanmam	Hiç kullanmam	Sık kullanırım	Hiç kullanmam	Hiç kullanmam	Hiç kullanmam	Hiç kullanmam	Son 1 hafta içinde	1	0 TL	Eğitim / Öğrenme, İçerik Üretimi (metin, görsel, ses), İş / Mesleki Amaçlar, Günlük İşler (takvim, e-posta, öneriler vs.), Eğlence	Orta düzeyde yetkinim	Orta düzeyde önemli	Katılıyorum	Kararsızım	Kararsızım	Kararsızım	Kararsızım	Kararsızım	Kararsızım	Kararsızım	Kararsızım	Kararsızım	Katılıyorum	Katılıyorum	Katılıyorum	Katılıyorum	Katılıyorum	Katılıyorum	Katılıyorum	Katılıyorum
2025-05-28 11:43:07	Kadın	20	Lisans	Grafik tasarım	Mardin	Evet, kullanıyorum.	Hayır, kullanmıyorum.		Hayır, kullanmıyorum.		Hayır, kullanmıyorum.		5	Çok sık kullanırım	Hiç kullanmam	Sık kullanırım	Hiç kullanmam	Ara sıra kullanırım	Hiç kullanmam	Hiç kullanmam	Hiç kullanmam	Hiç kullanmam	Hiç kullanmam	Hiç kullanmam	Hiç kullanmam	Bugün	1		Eğitim / Öğrenme, İçerik Üretimi (metin, görsel, ses), İş / Mesleki Amaçlar	Orta düzeyde yetkinim	Vazgeçilmez	Kararsızım	Katılmıyorum	Katılmıyorum	Kararsızım	Katılıyorum	Katılıyorum	Katılıyorum	Kararsızım	Katılmıyorum	Katılıyorum	Kesinlikle katılıyorum	Kesinlikle katılıyorum	Kesinlikle katılıyorum	Katılıyorum	Katılıyorum	Kararsızım	Katılıyorum	Kararsızım
2025-05-28 12:07:56	Kadın	19	Lisans	Grafik tasarım 1. Sınıf	Denizli	Evet, kullanıyorum.	Evet, kullanıyorum.	ChatGPT	Hayır, kullanmıyorum.		Hayır, kullanmıyorum.		4	Sık kullanırım	Hiç kullanmam	Hiç kullanmam	Hiç kullanmam	Hiç kullanmam	Hiç kullanmam	Hiç kullanmam	Hiç kullanmam	Hiç kullanmam	Hiç kullanmam	Hiç kullanmam	Hiç kullanmam	Bugün	1	0 Tl	Eğitim / Öğrenme	Yetkinim	Pek önemli değil	Katılıyorum	Katılıyorum	Hiç katılmıyorum	Katılıyorum	Hiç katılmıyorum	Hiç katılmıyorum	Hiç katılmıyorum	Hiç katılmıyorum	Hiç katılmıyorum	Hiç katılmıyorum	Kararsızım	Kesinlikle katılıyorum	Kararsızım	Kararsızım	Katılıyorum	Kararsızım	Kararsızım	Katılıyorum
2025-05-28 12:27:30	Kadın	33	Yüksek Lisans			Evet, kullanıyorum.	Evet, kullanıyorum.	ChatGPT	Hayır, kullanmıyorum.		Hayır, kullanmıyorum.		2	Nadiren kullanırım												Son 1 hafta içinde	1		Eğitim / Öğrenme	Orta düzeyde yetkinim	Pek önemli değil	Katılmıyorum	Katılmıyorum	Kararsızım	Katılıyorum	Katılıyorum	Katılıyorum	Katılıyorum	Katılıyorum	Kararsızım	Katılıyorum	Kararsızım	Katılıyorum	Katılıyorum	Katılıyorum	Katılıyorum	Kararsızım	Katılıyorum	Katılıyorum
2025-05-28 12:46:34	Erkek	21	Lisans	Grafik tasarım - 2. Sınıf	Denizli	Evet, kullanıyorum.	Evet, kullanıyorum.	ChatGPT	Hayır, kullanmıyorum.		Hayır, kullanmıyorum.		2	Ara sıra kullanırım	Hiç kullanmam	Hiç kullanmam	Hiç kullanmam	Hiç kullanmam	Hiç kullanmam	Hiç kullanmam	Hiç kullanmam	Hiç kullanmam	Hiç kullanmam	Hiç kullanmam	Hiç kullanmam	Son 1 ay içinde	1		İş / Mesleki Amaçlar	Biraz yetkinim	Pek önemli değil	Katılıyorum	Kararsızım	Kararsızım	Katılıyorum	Kararsızım	Katılıyorum	Kararsızım	Hiç katılmıyorum	Hiç katılmıyorum	Katılmıyorum	Hiç katılmıyorum	Katılmıyorum	Katılmıyorum	Katılmıyorum	Hiç katılmıyorum	Katılmıyorum	Hiç katılmıyorum	Katılmıyorum
2025-05-29 09:38:31	Kadın	24	Yüksek Lisans	Çalışma ekonomisi ve endüstri ilişkileri- yüksek lisans	Kırklareli	Evet, kullanıyorum.	Hayır, kullanmıyorum.		Hayır, kullanmıyorum.		Hayır, kullanmıyorum.		2	Ara sıra kullanırım	Hiç kullanmam	Hiç kullanmam	Hiç kullanmam	Hiç kullanmam	Hiç kullanmam	Hiç kullanmam	Hiç kullanmam	Hiç kullanmam	Hiç kullanmam	Hiç kullanmam	Hiç kullanmam	Daha uzun süre önce	1	0	Eğitim / Öğrenme	Hiç yetkin hissetmiyorum	Orta düzeyde önemli	Katılıyorum	Katılmıyorum	Katılıyorum	Katılıyorum	Katılıyorum	Katılıyorum	Kararsızım	Katılıyorum	Katılmıyorum	Katılıyorum	Katılmıyorum	Katılıyorum	Katılıyorum	Katılıyorum	Katılıyorum	Kararsızım	Katılıyorum	Kararsızım
2025-05-29 10:12:23	Kadın	30	Lisans	Hemşirelik- mezun	Ankara	Evet, kullanıyorum.	Evet, kullanıyorum.	ChatGPT	Hayır, kullanmıyorum.		Hayır, kullanmıyorum.		2	Ara sıra kullanırım	Hiç kullanmam	Hiç kullanmam	Hiç kullanmam	Hiç kullanmam	Hiç kullanmam	Hiç kullanmam	Hiç kullanmam	Hiç kullanmam	Hiç kullanmam	Hiç kullanmam	Hiç kullanmam	Son 1 ay içinde	1	0	Eğitim / Öğrenme, İş / Mesleki Amaçlar, Günlük İşler (takvim, e-posta, öneriler vs.), Eğlence	Hiç yetkin hissetmiyorum	Pek önemli değil	Katılmıyorum	Hiç katılmıyorum	Katılmıyorum	Katılmıyorum	Kararsızım	Kararsızım	Katılmıyorum	Katılıyorum	Katılmıyorum	Katılıyorum	Katılmıyorum	Katılıyorum	Katılıyorum	Kararsızım	Katılıyorum	Kararsızım	Katılıyorum	Kararsızım
2025-06-03 18:32:21	Erkek	30	Doktora	Tıp	Konya	Evet, kullanıyorum.	Evet, kullanıyorum.	ChatGPT	Hayır, kullanmıyorum.		Hayır, kullanmıyorum.		3	Sık kullanırım	Nadiren kullanırım	Hiç kullanmam	Hiç kullanmam	Hiç kullanmam	Hiç kullanmam	Hiç kullanmam	Hiç kullanmam	Hiç kullanmam	Hiç kullanmam	Hiç kullanmam	Hiç kullanmam	Bugün	4	20 usd	Eğitim / Öğrenme	Biraz yetkinim	Orta düzeyde önemli	Kararsızım	Katılıyorum	Katılıyorum	Katılıyorum	Katılıyorum	Katılıyorum	Katılıyorum	Katılıyorum	Katılıyorum	Katılıyorum	Katılıyorum	Katılıyorum	Katılıyorum	Katılıyorum	Katılıyorum	Katılıyorum	Katılıyorum	Katılıyorum
[truncated: 34 more columns]
